# Supplementary material for: Identification of a Gene Signature That Predicts Dependence upon YAP/TAZ-TEAD
Source: Preprints.org preprint supplement (doi:10.20944/preprints202312.2314.v1), 2023-12-29
Supplement: Supplementary file 1 [file supplementary]

## Sheet: Tab 1-YAP High vs. Low
Gene	eb5f1a1d-7abc-4a8d-ae7f-eade4dd13f40.rna_seq.augmented_star_gene_counts.csv	40b92a76-f324-4cdd-8209-517d021acd47.rna_seq.augmented_star_gene_counts.csv	39632b4c-bc6d-449f-82c7-56dfe6766791.rna_seq.augmented_star_gene_counts.csv	da7cbc0a-95dc-4303-a5dd-75857c066f3b.rna_seq.augmented_star_gene_counts.csv	5ed0377f-26aa-4b4c-bb59-03001895aecd.rna_seq.augmented_star_gene_counts.csv	41b25e1d-b18b-427f-906c-b16f29056775.rna_seq.augmented_star_gene_counts.csv	1c25bdab-9259-4b1f-b4d5-20b496d36a1a.rna_seq.augmented_star_gene_counts.csv	981c9bee-bedd-4a1a-929a-26013d1077e0.rna_seq.augmented_star_gene_counts.csv	3e1c728a-cf38-4ca8-9d87-0bbf098567a6.rna_seq.augmented_star_gene_counts.csv	6d7694d5-8582-466f-8072-df47dc10d780.rna_seq.augmented_star_gene_counts.csv	aeac6db7-09bd-45f9-a5fd-c8358f86bff8.rna_seq.augmented_star_gene_counts.csv	399cd50c-1439-48a4-ba3b-a0782b2b7b62.rna_seq.augmented_star_gene_counts.csv	a92a00e1-51c4-465d-8547-ead45bf2527e.rna_seq.augmented_star_gene_counts.csv	689c3b5e-8bff-45d0-8165-b4b0e6dbf910.rna_seq.augmented_star_gene_counts.csv	f5760366-59eb-417d-a935-3f78e999dd42.rna_seq.augmented_star_gene_counts.csv	3c5fe4dc-8606-4615-994f-c41861f08f5a.rna_seq.augmented_star_gene_counts.csv	e7c14078-b85e-40b8-9f56-9474543905eb.rna_seq.augmented_star_gene_counts.csv	dc3154b7-6ae4-446a-8a80-91a86c57cefe.rna_seq.augmented_star_gene_counts.csv	4f521ce8-4aac-4ea5-abbe-732ff9ac5409.rna_seq.augmented_star_gene_counts.csv	44f9e45d-d779-4865-8f10-d085d5d25447.rna_seq.augmented_star_gene_counts.csv	52425995-0bd7-4149-bc2a-26522ebd143d.rna_seq.augmented_star_gene_counts.csv	fcfc55a0-35e6-4fae-a599-66af11ba856d.rna_seq.augmented_star_gene_counts.csv	d3be84d5-9dd7-4366-9aea-532dc76f19ba.rna_seq.augmented_star_gene_counts.csv	7f51ff28-397d-466f-82b0-25e9c9182ea7.rna_seq.augmented_star_gene_counts.csv	20a06f04-b457-408f-8c3c-f0032badf064.rna_seq.augmented_star_gene_counts.csv	ad2bbb19-6d02-480f-b011-d4327c3c5607.rna_seq.augmented_star_gene_counts.csv	85d43afd-9aac-48ca-a9c4-00357b7207e1.rna_seq.augmented_star_gene_counts.csv	22e9b9d1-ac71-43f5-8606-f9f53c6ecc08.rna_seq.augmented_star_gene_counts.csv	08e3d239-3d8a-4eee-9e08-ac2bcb3f2619.rna_seq.augmented_star_gene_counts.csv	cc1c7e4b-89a0-4d94-b9e5-293c2eacadd9.rna_seq.augmented_star_gene_counts.csv	4e64826b-fffb-4430-bc34-ea6086e89a0a.rna_seq.augmented_star_gene_counts.csv	edef6762-dd96-4284-81e6-2e128af287fa.rna_seq.augmented_star_gene_counts.csv	c0054cf0-8f4b-47b6-a8fc-63a1fd36bcc7.rna_seq.augmented_star_gene_counts.csv	8ad884fa-e426-4bc0-960d-08db42d341da.rna_seq.augmented_star_gene_counts.csv	b1f01324-d0ca-4779-9ae0-5348e2613084.rna_seq.augmented_star_gene_counts.csv	c7d31245-5d71-4a23-8a33-4f83c4718e20.rna_seq.augmented_star_gene_counts.csv	d93b1580-c20d-4611-ac99-c0cb33f37a45.rna_seq.augmented_star_gene_counts.csv	966a66a2-8aac-41e8-8007-88fd92d2e8e8.rna_seq.augmented_star_gene_counts.csv	853ba3ed-7943-46df-9405-c19f0b01e8f6.rna_seq.augmented_star_gene_counts.csv	f5e6497a-ed39-408d-9034-a965baaafbf7.rna_seq.augmented_star_gene_counts.csv	69d9a82b-5c37-45bd-a1cf-ffe1392e84fc.rna_seq.augmented_star_gene_counts.csv	718de66e-06d2-4c2c-8b2d-e40087c4340c.rna_seq.augmented_star_gene_counts.csv	d4cdfd13-829c-4f29-984b-5a8897437e3e.rna_seq.augmented_star_gene_counts.csv	959c268c-637f-4f39-a254-a505c57e8448.rna_seq.augmented_star_gene_counts.csv	b428d434-2904-4f67-a66f-b7928e2951e3.rna_seq.augmented_star_gene_counts.csv	0918cbd5-edd0-41c8-8b67-677f35ad4611.rna_seq.augmented_star_gene_counts.csv	87dc0bab-b318-47ec-a9a3-819a7388e731.rna_seq.augmented_star_gene_counts.csv	bb6e957d-5069-447e-95f0-5fcac2c5e744.rna_seq.augmented_star_gene_counts.csv	040cf8cf-7b9d-4873-a51d-ba13bba4201a.rna_seq.augmented_star_gene_counts.csv
YAP1	20.1406	19.6419	19.0289	18.2846	16.1921	16.1836	16.1611	15.5722	15.3203	14.8597	13.6839	13.2728	13.2344	12.8758	12.6357	12.5098	11.7944	11.7786	11.6591	10.7826	10.5017	10.462	10.0018	9.9051	9.3324	8.1416	8.1261	7.9196	6.9025	6.5317	5.9671	5.1857	5.1026	4.7709	4.6154	4.3912	4.3075	4.1907	816.222	316.563	284.009	150.596	150.127	130.587	126.367	125.743	121.299	120.677	119.415
WWTR1	37.1664	21.1737	34.6123	6.9531	19.0491	12.1895	231.679	142.437	12.6667	33.5327	11.9986	14.3227	25.3705	15.4649	37.1469	87.3049	13.542	3.7584	12.4971	10.0999	27.5252	35.4487	2.6998	12.5698	16.2233	6.2567	12.7314	5.9447	7.704	7.0309	3.4183	9.5064	9.2084	3.248	2.3785	5.5826	3.5764	6.0216	67.3864	646.001	8.2577	15.9657	244.631	66.4132	19.8376	526.011	122.296	25.6955	73.9557
ABL2	20.8964	8.9691	7.0664	15.7459	18.3488	13.0473	15.5382	4.3625	30.3963	12.5628	22.2782	22.0865	25.0146	28.837	15.6949	22.2901	8.346	5.0504	10.0473	10.7779	26.5604	19.3927	7.54	5.7047	19.9768	4.3836	29.6935	4.1271	9.7457	18.2231	14.774	6.6273	1.5721	8.9843	5.2653	5.6271	1.3975	15.4131	59.9947	26.2075	12.5459	25.6369	27.6674	48.4759	53.4579	19.6696	116.754	31.039	46.2536
ADRB2	3.1549	2.2158	0.8048	1.7716	2.4739	8.4214	1.1316	6.5173	6.4907	2.0523	4.9635	2.815	0.8265	1.2175	1.1795	2.6604	0.236	1.3383	1.5505	1.5815	0.6152	1.1079	2.3676	1.7164	0.4367	4.2298	1.3555	50.8009	0.1806	4.8285	1.7731	6.8469	1.0249	0.0694	11.8758	0.3048	5.9751	1.7698	0.6338	1.791	9.9682	9.8997	7.7698	3.2714	3.6253	4.2623	3.0918	12.966	5.723
ANKRD1	0.2571	0.2318	0.0232	0.0569	0	1.9118	249.92	0.8584	0.2795	0.577	0.0246	0.1532	0	0.0472	0.2265	0.4318	0	0.1229	0	0	0.0477	0.2028	0.0649	0.7149	0	0.0273	0.2345	0	0	0	0.9766	0	0	0.13	0.1367	0	0.0819	0.0337	0.2376	0.0839	0.0667	0.2319	0.3324	0.0341	0.2098	0.1844	0.0675	0.0379	0.1839
AOX1	12.4365	0.882	1.5203	0.6215	6.4798	9.8384	1.0323	3.4081	0.0411	4.0931	1.5703	4.0208	1.4323	0.9998	0.9206	1.194	0.1976	1.0163	0.0962	0.1471	0.3868	1.3614	3.2016	1.4074	0.3335	3.9347	0.5302	0.2277	0.2322	0.0108	0.4982	0.9855	0.0663	0.0086	0.2865	0.1449	0.8676	2.3439	1.1104	6.7476	6.3142	8.6803	6.0021	0.6537	2.5094	0.3812	0.5585	0.9524	64.8447
CYR61	63.6913	150.101	16.8945	75.9515	9.5324	201.803	72.7465	72.0241	34.5351	135.891	10.1767	60.4777	13.5875	17.9516	63.8934	19.1844	9.229	15.2841	12.3792	49.6089	18.3149	14.6987	19.8038	35.3478	22.8202	76.0092	9.1381	68.1036	1.9573	8.5977	7.3274	11.6568	17.6707	1.0948	9.6527	6.3695	31.5997	49.8833	24.7552	88.802	54.5039	65.6022	138.056	11.641	24.5375	94.0336	23.5946	115.843	98.3539
CTGF	130.974	253.519	146.242	117.779	31.345	248.102	513.68	138.716	78.9514	130.634	18.4686	113.933	69.0078	52.3779	78.6929	214.862	24.8597	27.6552	33.1527	73.3598	11.16	31.5456	77.0907	152.622	19.3138	76.1651	20.648	27.9903	3.8169	14.6007	19.9703	124.768	28.3909	9.4147	21.8807	5.9339	83.5249	109.195	55.0947	306.327	182.456	154.055	611.279	62.8787	91.4614	306.11	73.9411	336.3	102.913
CRIM1	14.0022	2.7966	4.2511	4.5971	9.9394	16.3951	18.9213	22.7848	5.3305	20.3039	4.9707	4.2241	3.8579	2.4296	4.413	5.7715	1.2036	2.8285	0.5406	0.6021	3.031	2.3472	3.5097	7.7096	1.1264	3.8165	1.2511	1.3197	1.0047	2.2632	2.2744	6.7642	2.517	0.4353	1.4534	0.4689	2.4413	2.3754	4.6142	61.97	31.2401	16.707	43.601	9.7711	11.4111	55.4234	15.3347	8.7842	87.7346
DDAH1	6.4611	3.3696	1.4852	4.165	2.0117	9.1016	19.8002	6.8668	5.8181	10.6276	6.266	3.7061	2.8499	2.0359	3.4466	4.8746	5.5673	2.589	1.7137	0.9543	1.3685	3.6522	1.7613	3.7801	2.4711	5.8568	0.4423	0.8691	3.9054	1.3659	0.6669	2.6214	1.5742	0.1623	1.2985	0.3418	0.7461	1.4743	1.5414	6.4845	4.6089	5.2295	30.8178	2.4193	3.1937	15.4676	6.0991	26.8543	26.1197
DKK1	2.2378	4.1568	2.4875	0.1376	0.1539	0.7585	116.823	14.6609	0.1001	97.1521	0.0396	6.4813	2.4828	12.1005	1.408	58.1921	0	0.3961	0.8588	0	33.4555	1.0976	0.3664	0.1728	0.9791	0.0661	0.756	0.2919	1.5923	0.0791	1.7054	5.8226	0.5654	0.1676	0.551	0.0767	0.7705	0.5437	2.609	30.4033	32.8582	1.4539	4.7076	8.7852	0.1933	2.9716	117.72	2.9913	515.113
DLC1	8.9925	5.862	14.1464	9.6286	8.8802	13.4024	13.5143	22.2961	22.9018	13.4361	11.2362	5.0006	3.7862	4.0361	9.2068	30.9489	6.0933	3.3778	4.8115	6.4697	2.2196	5.5458	11.2665	7.8665	7.0878	7.8715	3.9701	1.2921	1.2555	6.2288	6.0406	7.6518	1.9561	3.1245	8.0481	2.3819	1.5974	5.7673	70.1776	15.2349	19.1521	44.017	91.5216	95.4133	23.7936	164.735	18.4286	40.7111	26.4423
ELL2	6.0859	4.9911	10.8758	21.0725	10.5643	31.6932	30.3624	10.0599	3.9423	24.8874	4.7991	2.4495	4.9423	3.0319	9.679	20.0937	0.596	1.4697	1.7483	1.1197	2.7156	9.6902	5.1843	5.0948	1.5622	22.822	2.4411	7.7065	1.381	1.491	4.4987	5.474	1.161	1.4207	1.0101	1.6737	3.8245	2.4211	20.119	55.8902	8.1162	7.1778	53.9705	9.9938	20.3982	5.989	12.6238	15.2316	102.163
EPHA2	15.9142	6.4128	43.9774	54.2315	7.4043	20.1637	279.305	5.8796	21.8314	28.6723	51.1268	72.36	12.2831	37.9707	14.4603	9.5593	22.1436	18.0571	200.174	77.6482	9.4668	36.4603	16.2255	221.273	10.5023	8.9929	15.1721	137.463	0.878	14.253	1.9877	11.3274	11.069	64.4718	9.6939	11.4585	46.1662	17.2063	18.5508	160.835	25.9734	102.575	54.2949	41.4647	188.621	133.581	37.6467	87.7665	109.103
FOSL1	59.7992	148.095	17.765	13.1214	6.8307	11.9132	40.1482	7.3596	0.9429	19.7258	20.0136	30.078	27.9125	108.049	5.3093	2.2528	23.7304	63.0229	13.3858	128.01	48.2031	30.3171	30.1239	84.0893	13.9999	5.7311	5.4874	268.44	5.6224	28.5163	20.6902	4.148	12.0265	22.0966	13.447	2.6013	24.6412	121.405	10.1704	332.929	14.0202	266.096	37.2539	9.7909	162.517	49.5348	156.809	7.2572	1048.89
GADD45A	23.4284	13.3101	16.6159	30.912	30.8414	26.3918	78.5204	98.4215	14.6146	17.2761	28.353	19.6799	35.6342	16.6173	14.2898	35.2765	14.0065	13.9952	18.6764	21.2928	12.7113	49.5759	25.8155	24.0973	50.8325	28.1661	29.0395	6.752	4.2409	15.3607	55.018	15.1154	5.7781	34.1345	5.0861	15.0161	7.442	8.281	44.7389	52.2077	21.158	67.5053	62.66	39.6891	22.7186	78.1711	42.3442	83.2187	146.297
NAV3	2.1281	1.0703	1.2639	0.0537	1.0811	1.1736	2.4018	3.1422	1.9513	3.2482	1.7669	1.7552	1.8796	1.8426	1.1471	9.135	0.2535	0.4265	1.1971	0.8991	0.4792	1.4726	1.5583	0.9252	1.1115	0.6781	0.959	0.2099	0.2813	0.7408	2.304	2.9645	0.277	0.7886	0.341	0.6469	0.2946	0.5139	4.1719	11.1667	2.3523	3.1893	7.8935	12.2565	6.4661	2.4791	9.1924	10.0072	40.1338
PAWR	1.4848	1.9523	1.1889	0.3579	1.8801	7.3696	5.9907	1.0968	1.3213	5.1488	2.2561	0.2973	2.2222	0.2089	3.109	9.1361	0.8447	1.2923	0.7018	0.069	3.6259	3.1129	0.1361	1.8534	1.9181	3.4165	2.0995	1.3494	1.6167	3.0521	2.0405	0.6493	0.4357	0.3713	0.375	0.4109	0.9202	0.7018	5.5606	6.521	1.4347	1.3443	8.0654	4.7331	0.5119	9.3733	9.3126	1.3465	10.3456
SH2D5	0.7179	5.8027	0.0833	0.5677	0.4026	0.1291	1.8669	0.1317	0.2726	0.4696	0.206	1.4666	1.9811	0.5085	0.2194	1.1074	0.6441	0.1715	1.4943	0.6208	0.3807	0.6704	0.8031	1.7397	0.1856	0.4799	2.9938	8.3723	0.6777	1.4224	1.2175	0.67	1.2095	0.7156	0.0182	0.2279	5.1215	1.3861	0.2133	0.6026	2.7684	1.0898	1.3072	0.0815	0.1913	0.0919	2.1142	1.1634	5.135
SMURF2	8.2176	1.51	3.369	5.9048	9.1786	14.0357	41.6868	5.8744	2.2199	11.1228	10.6424	5.4295	9.0157	5.0675	6.8726	9.6748	1.5644	2.5688	2.8528	2.9792	5.0915	9.4125	4.5931	13.7492	4.15	5.8277	4.0157	0.5437	1.3517	4.0345	4.0091	3.8059	1.2498	1.8194	3.6706	1.6588	0.3186	1.825	25.258	117.974	6.4829	15.9437	19.5039	16.628	18.3381	57.1424	17.1648	15.2448	88.1541
TEAD4	113.684	96.2546	10.8642	14.1083	29.5947	18.3512	27.6808	39.8475	41.522	18.7223	42.1584	40.8973	47.3906	57.2089	13.1859	12.2067	82.927	23.1525	42.9632	39.7073	15.8802	40.4213	32.5997	42.13	22.0246	11.6798	34.1055	22.0407	9.545	63.9065	15.4645	111.32	53.4256	9.3481	30.4664	8.3757	23.5549	67.7346	32.6449	41.0392	59.9302	75.2677	41.9601	30.3132	39.2724	30.2801	49.3754	70.7734	120.81
WWC1	3.889	4.239	0.3749	2.7035	2.3051	3.8381	1.8002	0.3869	9.1544	2.6512	1.2137	2.1258	3.6259	0.5868	1.2005	5.7827	7.2926	2.7812	4.0647	0.5921	9.1194	2.8346	0.6514	0.514	2.2073	3.0918	0.7217	3.0252	1.0785	7.3177	0.8308	0.0338	2.9583	0.7385	0.0971	0.896	4.7866	0.8085	5.1464	0.5662	7.973	14.4493	4.6625	2.776	0.7079	21.7091	3.7158	6.1527	19.706
ACAT2	22.8792	7.8615	7.0676	2.6834	32.802	22.3036	17.7927	6.3149	4.3822	17.3922	11.8254	12.5718	20.1928	26.2603	14.7686	11.0879	3.5407	14.2922	12.7911	36.6431	14.2724	24.5475	19.0512	3.2731	4.6809	8.6225	17.2325	7.8483	3.1686	47.5258	2.5117	5.5451	4.2318	2.6275	3.2463	1.0721	4.6318	6.4295	41.5183	19.9521	4.277	22.0598	16.7817	36.5526	15.4739	24.1966	10.9675	6.5507	67.7262
ADAMTS6	0.3439	0.2664	0.3152	0.6424	0.2166	2.4956	0.4633	2.0285	0.1428	0.5258	0.0617	0.08	0.3885	0.0789	1.1562	8.9405	0.0231	0.1797	0.0135	0.1394	0.1496	0.5329	0.1154	0.1643	0.2323	0.5028	0.0735	0.0303	0.2431	0.041	0.1446	0.0397	0.0314	0	0.0667	0.0637	0.0343	0.148	0.5214	7.1034	0.2231	0.2693	0.9329	0.2919	0.2381	3.4291	0.3034	0.4828	21.4362
ANLN	75.4338	10.7936	5.3613	6.3035	11.9108	22.3158	29.4686	16.7128	16.3635	27.9756	11.4058	18.2427	34.101	26.8886	14.6975	14.7942	7.6386	4.5474	6.7564	6.7021	15.9365	45.1115	6.8134	2.742	11.9194	10.6079	20.463	1.4215	4.7342	26.8112	4.0447	2.8847	4.3003	3.8489	1.6666	6.332	2.5764	9.2734	57.8425	38.6645	9.9185	45.1914	69.8372	55.6776	41.9477	117.758	79.7598	55.1663	136.381
ANXA2	228.35	105.301	102.145	118.594	177.207	186.879	127.599	144.6	149.345	240.368	406.783	96.2646	198.514	293.602	185.587	44.2093	105.45	168.088	99.5709	102.667	209.601	158.363	224.079	159.061	58.6339	203.164	129.833	151.971	63.5213	299.696	87.1452	235.556	162.276	67.8943	350.396	78.5033	162.235	159.58	234.511	549.686	339.142	414.224	187.957	631.755	247.453	267.479	266.689	161.734	829.967
AXL	27.2319	8.4861	2.4516	6.6586	32.8091	10.4391	62.9618	14.1351	4.191	22.338	7.0902	12.3725	7.9259	12.7576	13.5811	23.0773	2.7377	9.4562	5.4603	3.8756	6.097	5.031	35.7068	20.613	4.632	17.2521	1.8261	5.259	1.6931	1.6195	3.2206	6.0321	6.7878	0.3354	6.3569	0.7171	4.5903	22.2053	5.5295	40.087	29.3366	32.6341	25.0508	6.746	27.0602	78.627	79.1967	20.9164	276.029
C12orf75	15.6875	4.1601	4.1493	3.4053	4.75	21.915	7.4218	6.1663	1.7342	14.8805	6.4561	2.9696	8.1199	6.6217	11.2468	6.3963	1.6319	2.8583	6.0527	1.4777	5.0902	9.7646	14.59	3.3738	1.8383	6.5598	1.7666	3.1895	1.4605	12.8064	7.9792	1.0742	6.2953	0.7085	0.5908	1.6075	2.8505	2.6682	13.3053	78.6821	9.0922	9.1472	11.6158	19.7212	4.6228	16.4816	9.7155	2.165	165.077
CEP55	71.1765	10.6538	2.8779	6.5018	14.6575	41.7847	18.577	14.0063	7.5855	27.0772	18.2697	6.5402	46.7136	29.2111	18.4415	16.3564	4.319	12.1456	3.7937	4.1113	15.9345	41.4172	8.5833	1.9442	16.4201	15.2708	15.8168	1.822	8.2152	14.0022	9.141	1.396	7.4273	3.1109	1.6859	5.5621	2.3771	7.5042	32.0652	33.8928	4.4277	37.131	31.7441	22.5668	37.0291	54.9246	44.0101	21.8768	118.979
CLDN1	2.3086	1.0865	2.3587	93.0745	0.3095	1.0158	0.0203	318.886	1.6244	74.1187	43.5669	9.976	2.935	1.4676	104.457	108.349	0.4583	0.1515	1.1471	4.3875	21.0812	0.2716	0.817	0.4762	0.204	0.3237	7.0195	25.6497	1.0021	0.1775	0.0201	41.0543	3.0782	0	10.2663	0.0658	17.9376	1.1318	3.253	0.4141	20.9218	46.4477	46.0164	2.0168	6.9812	47.3668	1.4323	4.7276	6.6592
CNN3	84.1026	85.1329	49.5253	140.959	107.419	88.8166	199.137	92.7527	75.2773	159.743	82.5435	56.6999	40.5165	115.716	271.182	41.8383	60.8756	53.855	138.697	84.0794	122.956	82.9894	81.8477	83.5244	67.6118	107.224	31.2235	20.8942	5.4393	101.2	6.6742	32.4664	72.4721	43.0246	51.6279	57.2491	11.648	44.0881	216.869	272.379	143.152	217.405	781.528	1006.95	234.656	1185.26	288.378	460.012	339.56
COL12A1	67.1775	44.1172	4.5323	9.8849	3.4536	15.8872	22.204	88.0307	1.2382	13.0163	3.6953	14.9435	21.615	20.0332	4.6392	233.614	8.5795	7.4832	0.6019	4.3674	1.5634	6.1285	6.7095	30.82	3.3616	7.0954	12.7059	4.3622	1.1306	2.5189	2.2349	2.1083	21.1441	0.3467	1.5458	0.598	11.3588	8.586	44.423	98.3562	133.96	27.3091	73.019	236.402	41.6628	185.143	36.3912	50.4528	20.6989
CPA4	0.186	0.2097	0.1889	3.411	0.1604	0.2394	1.3924	0.1344	0.0421	0.0626	0.1112	0.0462	0.1201	0.1601	0.0732	0.5301	0.14	0.5834	0.0292	1.0054	0.1834	0.1966	0.0734	1.5842	0.0234	1.1251	3.005	14.4948	0.0585	0.0888	2.2084	0.0573	1.2238	0.0235	0.2371	0.0258	60.1968	1.4188	0.188	3.1692	7.8007	11.4567	6.0778	0.2927	0.244	0.0625	1.1144	0.5995	0.5322
CYTH3	120.707	118.574	17.3869	15.8857	46.3692	16.4068	43.4463	22.5476	126.036	75.455	54.9213	220.143	142.676	129.222	40.4023	73.7643	113.57	51.3839	116.358	125.523	79.1139	181.576	74.0542	203.239	38.7621	26.1272	170.103	32.6304	27.9469	82.8594	29.422	54.483	76.6186	27.4585	19.8638	74.4897	18.9244	44.476	127.413	27.8308	78.4238	347.046	141.688	200.394	228.519	94.9002	185.445	257.938	45.5871
DIAPH3	5.1237	3.5968	0.5008	2.5325	2.3675	5.5977	7.1859	3.5139	1.3555	8.7571	3.2313	0.9161	9.3812	3.6173	2.4473	3.4024	1.7	0.9383	0.4228	0.7546	1.0874	7.3201	0.8581	0.5373	3.4967	2.2734	1.2888	0.259	0.5148	2.9344	0.5624	0.2458	1.3972	0.4601	0.5747	1.0619	0.2848	1.7584	6.1853	10.428	1.2214	8.0413	17.558	9.9932	8.3729	25.712	8.1024	6.9235	25.626
EPAS1	100.397	72.7023	14.8531	44.7067	117.255	106.774	36.8265	59.4282	31.9974	56.8889	26.5568	56.1026	147.096	71.3047	26.402	39.0879	72.9404	21.0694	31.2748	40.4988	9.2893	21.2415	74.114	67.2908	20.7565	21.9338	10.8146	25.5532	9.0074	31.1517	26.8343	118.947	32.4794	9.7081	35.1439	5.3204	38.1841	38.9492	29.071	42.2795	141.859	152.087	99.3557	43.5965	135.215	81.8547	72.1513	119.575	114.208
EPB41L4B	1.3083	0.1053	0.058	0.097	1.0348	0.4076	0.6808	1.4701	0.9244	0.215	0.0056	0.3306	0.0724	0.1448	0.0882	0.1331	0.1206	0.1256	0.1761	0.202	0.7642	0.0329	0.0148	0	0.2525	0.0435	0.3641	1.0367	0.1258	0.2304	0.037	0.5471	0.222	0.0059	0.0155	0.0519	0.9991	0.0153	0.1552	0.6864	2.3118	1.7857	0.7984	0.2709	0.0204	1.0052	0.4065	1.1874	0.9274
EPG5	31.0375	5.0544	2.4234	6.7199	20.5181	15.9474	6.0316	3.2625	4.5718	8.4942	8.6236	13.8392	37.5102	9.0515	8.2333	8.6292	14.3289	11.9573	11.316	10.3182	6.9701	27.7992	16.353	13.612	6.3013	5.4958	18.0795	1.6289	2.6696	10.5549	10.8385	6.9237	9.1202	4.8197	3.5744	5.1416	5.2882	8.8133	19.5921	16.8168	12.5443	20.1957	21.4212	33.3386	61.2776	13.7479	24.381	19.2715	33.107
ESM1	4.3422	3.7763	6.2186	5.4694	3.8812	0.8018	2.2656	11.8104	3.2219	0.8441	1.586	0.8148	0.9712	0.4866	6.4322	1.292	0.7648	1.2663	0.3221	1.6261	4.9176	2.2735	0.842	3.5414	10.9306	1.7633	0.2339	0.5177	1.4733	15.095	9.0374	0.611	0.6331	1.8324	0.2425	0.3672	1.2351	0.7626	9.3804	410.549	0.2662	2.4333	3.4734	2.9219	3.1096	26.0493	9.0682	7.9327	1716.41
ETS1	60.4459	73.3193	18.9831	47.7255	97.19	368.527	27.6494	35.0988	72.032	120.915	41.4238	85.5026	53.8273	75.6528	69.8029	91.7758	44.2724	18.6424	33.7717	26.7191	21.8447	47.5131	74.8707	23.2517	29.9768	53.9112	18.4574	9.6708	6.8794	44.3018	11.707	44.5488	17.0893	14.8416	24.6802	11.1479	8.0703	41.353	138.924	76.8351	55.9443	79.1996	190.911	451.849	73.3036	286.539	119.852	271.335	141.21
F3	3.9546	14.1976	1.4969	3.6012	0.9474	3.7032	5.2196	6.1225	6.0878	6.685	1.5557	4.1011	0.9059	1.7131	3.632	5.4138	1.7697	1.6765	0.7811	1.3789	2.3823	1.258	1.6514	0.8646	1.2184	2.6451	7.2485	14.3869	1.2139	0.3855	1.0348	0.3931	2.2068	0.0161	0.7492	0.2717	11.4187	2.9919	1.0131	8.4065	16.7614	7.7522	10.3383	1.4367	2.9378	24.6413	2.1775	10.0304	20.552
FJX1	9.4871	15.6073	6.1809	4.0867	4.0991	13.4571	25.3796	8.13	1.5714	7.7783	1.8294	3.001	10.2345	9.1328	5.9452	7.4346	11.7494	4.319	7.3032	9.7585	4.1	4.5054	2.8989	10.1319	8.9994	1.1796	1.9192	8.5275	3.8876	4.5996	2.5128	1.2966	7.0649	0.8317	1.2378	7.0413	6.828	2.9363	12.1526	37.8682	13.5028	39.0934	16.8524	15.0283	6.6239	15.4644	11.5776	4.621	132.564
FSTL3	25.7336	15.6984	40.2524	16.0248	62.6838	45.8945	51.1198	9.3914	38.0008	43.2058	9.6652	16.4983	21.7858	62.5141	44.2592	3.9318	78.8459	6.1815	20.2579	21.1241	131.969	9.9012	13.8935	24.8504	26.5576	9.9548	19.9765	24.8145	11.9543	21.2166	26.9698	5.0305	29.5155	8.1473	66.5662	12.8909	68.335	38.8017	46.9045	105.226	57.5936	15.042	12.8641	8.524	28.1306	26.7383	38.6294	34.735	229.918
GADD45B	38.4433	77.2414	21.003	37.0542	27.5861	56.9068	10.7232	41.1018	11.5983	36.4624	52.7037	34.2202	15.5862	13.6771	30.3641	28.1727	6.5741	33.8939	7.8402	40.5765	13.0828	42.7931	57.3885	57.1593	15.8187	60.8825	12.4678	45.3293	14.4697	8.0517	41.9053	22.1519	23.7465	3.9179	12.3454	5.8035	27.1682	53.5478	25.8599	69.7017	35.8377	115.713	33.2382	17.5396	28.7377	23.8084	29.9013	56.9808	50.4659
GFRA1	4.7692	0.2622	0.9625	0.0161	0.216	7.8568	0.6036	0.4232	0.1991	7.079	0.0232	2.2139	0.4055	0.267	0.2074	0.25	0.0751	0.7933	0.0974	0.3772	0.0855	0.2185	0.1469	0.6402	0.6676	0.0052	0.0295	0.0717	0.0766	0.0863	0.0844	0.1374	0.0803	0.0098	0.2449	0.639	0.1442	0.903	1.8812	0.5696	1.3271	2.2688	21.6113	1.1367	0.13	49.2565	0.1018	0.8568	0.1109
GNGT2	2.0708	0.6756	1.5003	2.0511	8.1228	10.3486	1.4792	4.0237	0.823	8.7077	3.6745	2.2998	2.1672	0.7506	5.7603	5.4588	0.5392	2.7019	0.8213	0.9424	2.2502	1.5354	10.9087	5.8338	1.4244	7.6488	0.29	2.2069	1.0958	0.104	1.2507	1.5448	2.6554	0.1653	2.3912	0.3027	0.579	2.86	1.1331	1.4676	1.7679	2.6493	2.2648	0.5415	4.702	2.1003	3.2913	1.7661	3.5858
HBEGF	10.0967	16.6527	6.3907	8.8092	7.0215	10.0363	36.6917	17.9264	28.2457	9.3264	4.7107	9.4912	12.5917	9.4123	9.4905	39.2003	8.8587	2.7399	14.8658	7.187	4.6417	6.6264	5.2485	10.785	13.5548	5.2535	5.6158	131.418	1.4702	7.8724	6.4557	12.1596	6.9	1.7743	1.7464	0.855	9.4026	11.1273	27.5055	201.672	12.2436	17.1714	54.755	21.5146	18.8619	20.9422	11.7615	37.4565	86.0639
IL11	1.4779	0.6198	10.6409	19.728	0.0912	0.2359	35.8628	0.2648	0.0415	0.2314	0.0164	1.331	0.213	3.787	0.7785	0.1237	0.2366	0.2053	0.1079	1.3374	0.2551	0.5423	0.0651	5.0173	0.0518	0.1645	0.209	6.8263	0.037	0.0656	0.272	0.0212	0.1842	0.0348	0	0.0764	0.2373	0.5411	0.9727	97.3539	1.5164	0.3617	0.3809	0.9108	0.8015	2.711	0.722	0.9113	66.2237
IL12A	0.1883	0.0531	0.4675	0.5733	0.1498	1.2926	7.9683	10.0962	0.0853	1.3313	1.2383	0.1403	0.389	0.1945	0.1777	1.4402	0	0.0844	0.0296	0	0.4369	0.9816	0.446	0.2618	0.0947	0.9011	0	0	0	0	0.149	0.029	0.1376	0.0238	0	0.0174	0.025	0.0309	0.3263	2.4205	0.0611	0.0236	0.2174	0.1248	0.0549	0.0844	0.3091	0.0694	1.0102
IL7R	3.5165	0.672	2.7877	5.6786	6.5288	152.151	6.1397	3.1413	0.6465	56.4924	3.9263	14.5445	0.6159	0.4422	6.6473	4.182	0.1052	1.1051	0.5953	0.1983	0.2625	7.1768	2.5296	3.3054	0.4995	7.0964	0.2208	1.1899	1.2243	0.0292	0.2178	1.3662	1.3857	0.0232	0.3456	0.0963	0.065	2.5377	4.0004	7.9229	2.5495	7.203	10.2937	1.3572	9.5644	3.4124	10.5893	2.455	2.8213
ITGB2	31.073	24.54	16.963	37.4553	126.797	213.752	11.3394	33.527	29.7461	118.753	48.7769	52.7568	30.7824	6.1272	153.635	74.3543	5.568	39.7651	12.5211	35.8031	13.3725	40.7363	257.579	426.761	11.814	180.081	3.1677	19.8799	5.0908	2.7363	4.9628	39.3048	45.6138	1.3075	28.0025	1.4143	6.214	101.804	16.7868	48.2012	31.5685	127.9	94.9286	7.0127	205.767	46.9848	114.524	48.1828	48.7235
KRT80	0.4218	1.3074	0.0952	0.1167	0.179	0.9892	2.0206	0.2979	1.9875	1.0319	0.1412	0.3351	0.3704	1.9463	0.1194	0.253	0.4173	0.063	3.0993	0.4559	6.7324	0.3684	0.4662	7.4333	0.0212	0.1458	6.3327	142.27	0.1742	0.0403	0.2337	0.156	4.1417	0.064	0.4768	0.125	502.829	1.0239	5.226	6.1446	61.855	32.5361	2.1037	5.1977	0.4673	1.985	2.7969	1.6156	2.3382
KRT81	0.1431	1.1831	0.2369	0.0264	0.1772	0.0819	1.1047	0.7659	0	0.4283	0.2282	0.0474	0.1232	0.241	0.06	0.2003	0	0.1995	0.4495	0.2063	1.3504	0.0807	0.0301	0.0995	0.048	0.2283	0.0363	0.3193	0.1713	0	0.151	0.1764	0.2325	0	1.29	0.053	0.6337	0.0939	0.1378	0	2.4767	0.3826	4.4066	0.158	0.1947	0.7698	0.2819	0.1054	0.0341
LAMC2	0.8157	0.0919	0.9511	0.0527	0.2596	12.9712	0.2822	0.646	6.2415	4.7476	0.0975	3.6451	0.8215	1.3669	0.1967	0.1386	3.7721	0.2355	0.2134	2.3512	0.3091	0.8351	0.2146	0.6521	0.1162	0.0795	6.4073	5.9511	0.3076	0.0259	0.0108	0.3184	1.8549	0	0.0844	0.0352	13.2309	1.3022	0.2356	1.8639	30.5658	7.2295	0.4395	1.36	0.5628	0.0731	0.4284	2.5435	187.213
LETM2	0.4817	0.7296	0.5843	0.575	0.7666	1.1022	1.1778	1.2952	0.4547	0.5879	0.3096	0.5456	0.2566	0.2834	0.4168	0.3973	0.4533	0.2338	1.0399	0.6509	0.6007	1.0349	0.9697	0.3453	0.8475	0.4402	2.117	0.1962	0.2108	0.8523	0.6195	0.2319	0.4255	0.2588	0.1668	0.1673	0.2079	0.3457	1.626	4.8895	0.6349	0.7696	1.2791	1.5159	0.6056	3.7377	0.6819	0.4435	8.0861
MB21D2	2.5842	5.0799	1.1256	1.2308	1.8331	3.661	16.889	3.3571	7.6237	4.9769	4.3398	0.9548	3.1815	2.7868	2.231	1.1716	0.9048	1.2745	7.1897	0.5197	3.1369	2.3706	1.2144	1.3578	1.9485	3.0195	0.3426	1.5026	1.3057	1.644	0.9037	2.148	1.435	0.1519	1.1188	0.8903	1.2291	2.2671	6.1267	8.3376	7.6039	4.247	7.8815	10.4909	3.8892	21.3589	3.1169	5.5554	42.8338
MFAP5	25.6311	8.6688	0.3632	0.3668	1.3182	3.5468	0.2267	6.6405	0.0429	1.0835	0.6791	14.3475	2.628	4.5853	1.2211	10.1645	1.9547	26.3666	0.2973	9.3117	1.4934	1.9738	2.5706	7.897	5.5319	8.5186	1.3313	0.9001	2.3201	0.1656	0.5432	0.6709	2.2719	0.1915	3.0211	0.9992	3.5077	3.1829	0.9979	372.702	17.1375	35.1578	42.338	6.3499	7.5613	2.7578	0	24.8408	1.625
MPP4	0.0374	0.0843	0.0253	0.0517	1.3188	0.0214	2.5369	0.144	0.0903	0.0084	0.0447	0.0371	0.2896	0.5149	0.047	0.0673	0.0241	0.0447	0.0235	0	0	0.1264	0.0236	0.039	0.0094	0.0199	0.0853	0.0132	0	0.2022	0.0296	1.509	0	0.0284	3.7697	0.1592	0.1192	0.0245	0.6262	1.1593	1.6616	0.0656	0.3625	0.1981	0.0545	0.0335	1.7794	1.0326	3.3557
MPP7	0.5074	0.1514	0.0943	0.1239	0.3088	4.2257	0.1906	0.1917	0.1713	1.1254	0.1356	0.1334	0.1773	0.1713	0.216	0.2954	0.0321	0.4903	0.1031	0	0.0346	0.2859	0.0471	0.0726	0.03	0.2777	0.2723	2.0603	0.075	0.5792	0.5788	0.0276	0.1236	0	0	0.0166	0.7294	0.049	0.1638	0.1827	0.5617	2.1318	0.4686	0.1384	0.3655	0.107	0.3037	0.2858	9.9274
NLRP3	1.6654	1.9642	0.5331	1.908	2.4037	4.2866	4.7308	1.119	0.6083	1.7731	1.1113	2.5767	0.5001	0.6935	2.4003	2.4509	0.125	0.5784	0.4378	1.2559	0.4043	0.8621	4.3412	4.1731	0.7787	2.1621	0.2797	0.341	0.1947	0.1355	0.2759	0.7041	0.9247	0.1175	0.4806	0.3658	0.2263	1.8294	0.5369	9.6241	1.9601	7.3373	6.1522	0.6158	7.6206	5.4502	5.6191	2.7671	7.8947
NPPB	0	0	0.0587	0	0	0	0.1038	0	0	0	0.1243	0.1936	0.0671	0.0597	0	0.078	0	0	0	0	0	0	0.3284	0.3615	0	0	0	0	0	0.0827	0	0	0	0	0	0.0481	0	0	0	0	0	0	0.4802	0	0	0	0	0.1915	0
NUAK2	3.2028	1.5907	2.7073	4.8227	13.275	42.4776	1.3652	2.2481	6.8863	18.7496	6.3473	13.1259	1.7243	2.567	7.2923	3.3376	1.0625	1.3782	6.0511	1.7603	1.4482	3.5638	19.7627	14.2267	2.2376	8.2689	1.4443	110.821	0.6043	2.1584	1.0525	4.7001	4.7085	0.3019	2.2737	0.5026	29.8034	16.6493	3.7469	1.5727	11.9229	9.4409	2.9329	0.9171	12.438	2.8708	6.8247	5.038	3.4944
OXTR	0.2039	0.1838	0.5061	0.3047	0.1514	0.8281	0.5535	3.862	0.2587	0.3935	0.3023	0.0304	0.3581	0.0655	0.5132	0.7094	0.0439	0.1583	0.0128	0.7053	1.5893	0.3447	0.3348	1.2473	2.2549	0.7697	0.0775	0.0144	0.1904	0.6097	0.9198	0.0754	0.0397	0.0928	0.0181	0.0755	0.065	0.1605	0.3533	0.9651	0.172	0.1226	4.5006	1.0131	0.1427	3.0704	0.7228	0.5557	0.8021
PCLO	4.6877	0.0453	0.1489	0.1225	1.2188	0.8424	1.966	0.0181	0.7632	0.8236	1.8473	0.0819	25.643	0.1792	0.8583	4.861	0.0052	0.1178	1.5313	0.0696	2.8657	1.1745	1.4331	0.0056	0.2144	0.0021	1.0491	0.0496	0.0477	2.7697	2.0667	1.158	0.1843	0	0.6617	0.3085	0.451	0.6679	3.9859	0.8242	0.1462	0.1634	0.078	1.4688	0.7507	0.0252	1.5136	0.0445	1.5714
PKD1L2	0.2025	0.1225	0.1204	1.9409	0.2122	0.5734	0.1262	0.019	1.4111	0.0244	0.1417	0.1349	0.2576	0.6598	1.0503	0.0533	0.1041	0.239	0.3505	0.6192	0.7653	0.4258	0.106	0.7862	0.0496	0.4122	0.03	0.0783	0.2199	0.1037	18.4709	0.2648	0.2406	0.9488	0.1204	0.1317	0.2938	0.013	0.1312	0.0202	0.3877	0.5272	0.4652	0.1309	0.118	0.0133	3.333	0.3674	0.0071
PKP2	0.449	0.0893	0.1907	0.0219	0.028	2.8627	1.6868	0.195	0.3669	1.1795	0.0379	0.3344	0.0136	0.0546	0.1579	0.0396	0.0284	0.0868	0.0166	0.2284	0.1777	0.2381	0.0834	0.5232	0.0199	0.2879	0.4517	0.4046	0.0474	0.5292	0.0105	0.0407	0.0579	0.0067	0.0585	0.0245	0.2666	0.2252	0.2364	0.1293	0.634	0.4236	0.1951	0.9623	0.0462	0.0947	0.0954	0.1167	0.17
PRKAG2	4.6561	0.8904	0.8168	2.8874	2.993	6.4611	2.9031	0.6547	1.1745	2.4621	3.5128	2.2478	5.1221	2.1608	1.6287	1.583	0.9087	1.0208	1.418	0.4845	1.357	3.1984	2.6077	1.5502	0.8478	1.7933	6.9977	0.4795	0.9537	2.7981	2.2171	0.5973	1.1249	0.3824	0.7599	1.5439	0.5238	1.9408	3.945	1.4083	2.5921	2.752	4.031	1.6666	3.2339	2.1194	2.2033	3.6028	7.3136
RAB3B	0.1945	0.0974	0.0293	2.3042	0.0497	0.2719	1.3857	0.1341	1.0572	0.1649	0.0034	0.0465	0.119	0.0595	0.2538	0.2074	0.0186	0.0129	0.0136	0.4048	0.1036	0.0568	0.0182	0.2303	0.1882	0.1034	0.3504	0.1395	0.0103	0.0092	0.0171	2.33	0.0597	0.0036	0.1628	0.064	0.0115	1.3371	1.6514	0.2821	0.2477	0.2779	3.1527	2.4476	1.3394	0.5616	0.1702	7.2833	31.6429
RAPH1	0.689	0.8658	0.1608	0.206	1.025	0.9286	1.3783	0.4576	1.0094	0.8425	0.3106	0.9987	0.814	0.9453	0.1495	1.1116	0.4122	0.0804	0.5023	0.1027	0.1617	0.5311	0.4101	0.3138	0.0796	0.16	0.1746	0.1143	0.1081	0.2015	0.1379	0.2538	0.247	0.1081	0.0597	0.0821	0.1388	0.426	2.5341	3.9812	1.2795	2.06	2.8232	2.7806	2.8303	1.9237	4.7052	2.4324	1.1499
RFTN1	28.9881	26.1234	12.752	14.6996	19.3186	133.83	28.0121	13.5565	5.7476	71.6059	68.308	28.3637	19.5072	31.7921	17.4863	12.5954	2.7978	6.5023	8.4356	5.0067	10.8439	13.2139	22.3398	14.1945	7.5477	27.7971	2.8314	10.6434	3.6939	2.0381	5.4069	9.3244	8.3135	0.7709	5.1069	1.208	12.4054	15.295	23.822	48.0377	21.3635	18.0399	39.9798	8.6431	19.6571	21.6585	15.1029	20.9252	60.088
RGS7	0	0	0	0	0.0948	0.4292	0.9984	0.1147	0	0.1123	0.0342	0.1419	0.0923	0.1804	0	0.0214	0	0	0	0	0.0497	0	0	0	0	0	0.0543	0	0.0128	1.5002	0	0.022	0	0	0	0	0.1518	0.0234	0.0413	0.0583	0	0.0179	0	0	0.0417	0	0.0235	0	0.4344
RNF144B	13.3316	5.0352	1.2933	2.2168	28.9581	20.9019	2.5294	1.3828	12.8057	48.5507	9.8655	10.1983	13.3206	16.2048	16.1381	9.278	0.8193	7.1345	7.1427	3.8479	4.9715	22.7284	8.5987	18.0403	15.8008	11.7724	11.9606	6.9013	3.1639	14.1768	3.0708	20.6871	4.1112	0.198	10.5637	1.6678	4.3211	7.4383	35.407	6.5075	30.8013	18.0559	14.729	23.5127	25.642	2.6165	8.3783	20.3603	9.3571
SFTA1P	0.2314	0.3912	0.3264	0.032	0.1074	0.0662	0.0693	0.6129	2.5161	0.0389	0.249	0.0718	0.1195	0.093	0.546	0.1388	0.1244	0.1901	0.1453	0.8754	0.3489	0.0815	0.2009	0.1408	0.5234	0.0615	0.044	0.1528	0.1039	0.2392	0.206	0.0178	0.1128	0.1316	0.141	0.1286	0.0154	0.0569	0.0501	0.2124	0.1126	0.116	0.1069	0.0766	0.6408	0.0519	0.1519	0.6392	0.3517
SGMS2	1.5551	1.3858	0.3047	1.2812	1.5603	1.1309	0.8469	0.805	0.8884	2.1373	1.0608	0.7182	1.8243	0.1937	1.2288	2.5815	0.7416	0.6481	1.0447	0.6776	0.9005	1.1888	0.6318	0.8464	0.7029	2.0317	0.2657	0.7896	0.4112	0.6979	0.7537	0.4977	0.376	0.0183	0.1389	0.1116	0.3458	0.1661	8.5435	20.935	1.2671	3.0209	7.1254	3.4421	3.6055	2.4528	3.9096	3.8803	9.7862
SLC8A1	0.7473	0.1609	0.1592	0.3672	2.3274	1.9092	0.8615	0.6443	0.1623	1.1496	0.3373	0.2981	0.4467	0.4684	1.2522	2.3648	0.0181	0.2132	0.3876	0.1089	0.3195	0.3241	1.62	1.004	0.3292	1.5559	0.0638	0.0517	0.0694	0.219	0.0631	0.238	0.0798	0.0127	0.147	0.0466	0.0089	0.4104	0.228	1.6104	0.4304	1.4225	1.8535	0.1057	2.2715	1.9607	2.1527	0.869	5.4383
TGM2	67.2929	33.1766	38.4509	56.9271	95.0983	47.0827	31.3139	49.2292	53.5073	33.0843	11.5024	56.1855	14.773	35.3184	52.3518	29.2856	6.3763	18.1864	25.4242	27.9885	24.8497	25.6524	66.5835	188.904	6.4614	69.8251	23.9081	7.2957	6.2335	12.0598	19.3373	17.12	44.816	1.8736	16.8252	1.6941	5.4627	67.3263	7.4178	131.626	16.3351	20.8304	62.6406	2.5317	164.532	75.4932	47.7055	69.1071	52.7521
TK1	316.528	210.22	27.1078	69.1162	55.4924	144.244	105.662	102.913	178.459	186.656	238.306	166.272	180.151	494.299	82.7079	35.3997	167.319	123.67	172.557	197.787	72.4924	178.537	156.852	42.3082	28.211	44.5851	164.387	54.7767	31.7974	145.415	55.1927	78.0545	324.596	32.6131	81.2144	19.5471	56.1283	262.05	310.817	51.581	106.655	248.826	125.087	77.9289	223.396	163.568	206.884	77.4206	165.45
TNFAIP3	81.4714	47.7479	6.8778	14.6098	83.5494	106.697	13.9798	8.832	2.5891	49.7147	12.5084	27.619	107.561	14.4724	39.564	35.4767	33.3366	9.8474	5.9814	4.1973	153.25	49.6882	26.5339	21.8368	3.7381	27.4912	28.4868	8.0564	36.2941	62.142	11.2051	8.0705	9.8357	8.696	4.0836	4.6603	25.0939	13.7348	30.7122	24.7982	7.1783	50.0956	16.9838	14.0879	25.789	23.6417	57.7429	14.1118	28.782
TUBB6	144.284	60.8286	13.5339	29.707	55.7862	34.9464	36.8061	92.4901	38.5002	68.0539	59.5515	62.6972	174.406	88.9308	42.2762	40.5978	36.1568	38.3654	36.4317	49.8822	53.8539	100.982	37.5783	35.2301	35.9233	28.9189	94.6935	131.247	21.6038	50.5152	20.6267	69.7299	75.4288	5.7506	50.6704	10.2409	104.536	75.1985	293.665	214.034	124.183	190.337	80.4312	139.093	44.2382	123.551	149.904	56.2853	1235.78
VGLL3	1.5171	0.6921	0.2217	0.4719	0.2338	2.6241	0.5999	1.54	0.096	1.4268	0.2349	0.391	0.3545	0.2852	0.5727	1.8027	0.115	0.4531	0.0318	0	0.1877	0.2768	0.1688	0.7885	0.3051	1.3597	0.1428	0.1705	0.0934	0.2574	0.0915	0.1336	0.1936	0.0183	0.0608	0.2274	0.1765	0.1043	0.4256	9.7398	1.2657	1.9625	9.8282	0.8184	1.1878	1.2951	0.3937	6.4441	13.1506
WWC2	3.5336	2.4269	3.7378	1.9611	3.6074	8.1639	14.2526	3.0665	2.5181	6.1667	3.5382	0.9138	5.2803	3.8784	4.1282	5.4757	1.1757	0.5497	0.5721	0.5968	2.0451	8.0065	0.9414	1.6376	2.2435	2.9502	1.1332	0.2657	1.0112	1.446	0.6409	0.8903	0.4215	1.2097	0.3956	1.0395	0.2591	0.7003	32.6615	15.1696	2.1793	5.6313	29.6094	18.2583	11.4059	22.221	20.8664	16.4027	19.4029
ZNF367	15.6021	5.3174	1.2168	5.5272	7.2699	13.765	5.9591	5.0168	3.0612	15.3059	6.7092	2.7887	12.1195	8.9166	5.9686	6.918	1.7289	7.0833	2.6651	2.9142	4.3665	12.7731	2.7903	1.18	4.9566	7.9368	4.6681	0.3868	2.2232	10.4497	2.1929	2.2922	1.8003	6.9419	0.8077	2.4685	0.7559	1.5558	4.3256	6.6006	1.8465	13.6375	16.3691	14.636	15.2234	46.8774	15.6182	5.0932	13.5517
C10orf90	24.6426	8.3569	8.443	3.1724	11.1775	0.1265	2.1181	2.9046	22.7245	16.8471	9.662	16.5077	35.2925	22.2839	6.0672	27.0639	0.0293	5.4351	48.5732	1.25	17.233	12.0657	15.1535	8.0392	5.078	3.3726	34.3485	2.731	4.0307	20.2101	17.6717	7.8183	16.5577	6.32	8.2163	4.0625	3.1439	19.9825	23.2412	0.0416	14.0362	6.9041	8.9527	0.0113	18.5115	16.1127	33.7627	18.6144	0.4257
PELI2	5.6345	5.0869	1.9572	2.7025	6.7211	4.7753	8.7495	6.724	7.7429	4.8661	5.2904	3.2662	3.2453	12.5686	4.2598	0.407	2.4428	3.1808	5.2336	2.6147	2.4979	4.5715	5.2348	3.4247	3.1289	4.125	6.3909	0.4623	1.9439	4.9076	3.3385	1.4362	1.5237	2.297	0.7126	4.4903	0.7052	1.1806	12.8475	7.9084	3.6464	11.0815	19.0169	27.1065	21.8081	9.2944	9.6737	27.9431	0.4009
NFE2	0.779	0.0878	0.5801	0.4096	0.1446	0.6461	0.2799	0.8753	0.6823	0.5944	0.5961	1.7018	0.1006	0.769	2.0586	0.3738	0.4859	0.1629	1.2475	0	1.1927	1.7559	0.7871	1.7871	0.0196	0.2278	1.2139	7.5031	0.1399	0.1735	0.524	0.6001	0.8351	0.0197	0.0863	0.101	2.9382	0.3833	0.6749	0.1271	1.1373	1.4641	0.8633	0.5161	1.8394	0.0349	0.3324	0.2008	4.6803
MGP	71.5087	32.5174	1280.7	473.184	9.2168	17.6705	7.9158	1180.96	33.4518	15.5262	3.6896	51.0958	1.5972	3.4982	1116.3	2173.71	5.7051	35.8034	140.588	139.357	5.9759	79.5687	838.177	34.3958	17.3878	118.566	1.963	5.4564	13.5892	9.5121	534.128	1517.87	4.1013	0.6125	26.5939	6.4349	8.976	12.11	1002.95	55.9372	268.544	55.2216	142.213	40.2134	10.0183	187.232	2.8046	1410.91	4.9709
BMF	6.6407	2.7804	9.5708	9.3625	16.5465	32.514	28.0598	5.2944	9.4009	12.3854	11.4181	12.92	3.9185	2.7152	16.947	18.153	8.7152	5.2488	23.9289	5.3332	3.4731	5.9512	11.7056	24.2915	12.8002	5.8844	17.096	3.1657	1.8021	1.2147	8.5718	7.591	4.1252	1.4695	17.1134	8.3294	1.4631	11.8947	7.0564	18.2988	26.7189	12.6779	36.1738	62.7324	25.2097	74.745	38.349	14.7859	1.6436
NCALD	36.6764	8.2284	3.8271	0.7411	60.2057	6.2904	11.813	19.1549	3.3319	5.5576	5.3467	6.2669	55.0135	23.4741	1.692	2.025	0.9353	6.4873	5.0952	4.7993	25.4429	10.3564	3.9312	2.9354	2.974	3.3341	9.5164	1.072	1.0684	14.8221	3.3327	1.2271	7.2826	2.2565	2.4194	2.2928	4.0122	11.081	17.9123	7.1815	8.9473	4.6629	9.1525	4.109	43.0458	5.7031	2.96	1.9808	2.1117
GAS7	69.0526	82.9921	96.1696	60.6514	66.6461	22.4259	38.6868	120.711	114.175	68.3579	65.4084	79.1957	49.376	90.4078	160.587	105.962	111.111	20.4001	247.927	136.606	129.659	83.7322	114.282	27.9034	35.2164	38.3848	117.185	27.869	4.2071	28.0372	32.4977	36.7911	36.8318	3.8391	41.6827	25.4933	47.2234	67.4682	275.434	36.5947	158.26	68.6044	217.054	618.777	94.9491	2097.76	140.663	189.232	3.6875
TRIB2	159.285	140.428	48.113	134.196	334.754	66.1297	231.72	201.026	144.984	100.445	116.563	107.433	119.195	361.603	311.772	142.03	116.897	105.037	249.509	161.243	276.104	182.357	197.867	90.3397	227.851	111.981	130.793	26.1393	64.2154	449.881	60.6155	80.4308	45.6124	116.939	224.862	49.9719	42.9684	154.536	606.067	102.616	111.084	175.541	453.625	527.351	107.099	678.536	290.401	527.01	17.9929
HTR7	0.2386	0.1195	0.0479	0.1174	0.3234	0.4701	5.3122	0.6638	0	0.4046	0.0761	0.0658	0.1506	0.1826	0.1835	0.5406	0	0.0317	0.1498	0	0.0861	0.0299	0.2009	0.5528	0.1466	0.0705	0.0605	1.5123	0	0.0337	0.0839	0	0.0775	0	0.0117	0.0491	0.1972	0.1913	0.1378	19.2756	0.5676	0.558	1.0283	0.1405	0.7264	7.7225	7.0658	0.5858	36.7262
GLT8D2	8.8917	4.0275	1.0668	3.8471	0.5821	3.042	10.1765	88.0928	0.323	2.968	1.7224	2.7243	2.3979	2.4804	2.0537	3.9664	1.0531	1.7985	0.2651	1.9465	0.705	1.1099	1.0839	3.4231	1.5842	3.1267	0.5133	1.0008	1.263	0.179	0.4899	0.3641	3.7432	0.0711	1.085	0.6461	1.5994	1.8829	1.5927	58.0964	8.6358	7.9539	9.1475	2.5725	5.6597	12.5603	0.6465	4.8912	15.557
MAN1C1	6.8627	4.9648	1.3531	7.874	5.1821	12.6455	1.2456	5.3099	3.2401	5.8861	6.6906	6.4603	8.1317	3.9139	9.3931	3.7679	0.7238	2.3513	9.6249	5.7757	1.0409	4.2752	15.1971	6.5854	2.5424	6.6793	0.8992	0.7182	0.3039	3.3603	0.9523	3.1483	2.7478	0.5929	1.9525	0.4343	3.1743	3.365	3.3454	4.0777	11.5457	4.9472	9.3141	6.3029	10.8439	25.7663	1.8276	6.9326	0.6564
DDIT4	41.4494	44.9474	18.4239	25.9446	54.2196	47.1873	24.4343	122.392	32.2116	29.0032	55.5662	58.8247	62.8348	72.725	37.865	36.0714	13.3004	12.6344	30.026	36.0361	44.6998	110.777	66.64	32.77	8.8297	26.9213	107.603	91.8256	4.0067	18.3014	91.529	32.5018	35.7882	2.6508	3.9127	9.4097	12.8066	53.7681	244.483	23.3308	34.7156	103.242	44.9022	46.0132	112.494	59.1636	297.533	85.5835	23.7169
FBXO32	79.071	86.5629	37.7256	37.9258	129.391	21.7564	33.8046	38.1426	25.465	41.3124	45.6348	59.664	141.576	69.1762	137.593	34.223	22.7705	33.5537	44.3101	28.4133	60.282	17.0993	34.7556	16.5083	31.3007	18.1248	34.7407	9.0466	31.5631	113.994	90.4125	43.8108	34.6366	13.4417	14.4921	17.9033	18.493	23.0915	86.6047	14.8904	42.8984	51.2138	79.8772	103.95	51.5053	50.2361	70.5564	311.364	1.3709
MSC	15.1585	154.543	21.0156	5.5455	88.0815	25.9123	8.2419	26.7372	369.695	20.5682	7.1034	13.4088	5.5793	11.6591	68.5452	7.3682	13.9595	12.9842	29.3244	105.09	6.2651	10.2112	175.303	27.1009	39.1279	84.7386	6.0262	39.9139	41.3886	24.441	4.8261	35.3792	23.0936	0.6827	66.7048	1.8552	276.007	20.4323	18.7186	8.958	45.3907	35.0613	43.6484	92.1693	14.5769	8.7849	2.0018	130.582	13.9263
HTRA1	305.409	127.522	20.456	39.3761	40.6214	50.7983	32.4952	124.022	9.5383	36.0795	15.6109	213.502	162.132	182.455	22.8299	22.2063	63.9113	112.235	299.922	129.819	218.739	23.6509	67.1122	113.206	33.2909	29.2087	17.0401	79.2888	29.4231	37.0836	36.0316	16.1083	336.753	1.9235	57.8747	10.8019	107.979	46.6421	22.8242	577.561	220.221	231.162	136.044	68.319	56.2361	133.026	641.224	65.6543	73.8471
COLEC12	7.6961	1.9354	1.2502	4.4265	8.4576	5.8218	1.0607	9.5126	1.06	1.8847	2.3617	3.0992	8.2476	1.0474	1.9874	1.6015	0.426	1.7371	0.37	2.9807	1.8145	0.7628	4.2426	4.0953	1.4114	7.5172	0.3621	0.7592	0.3916	0.1754	0.982	2.3945	4.5076	0.0887	1.4	0.2832	1.1253	1.6446	1.6	30.8099	9.7595	22.2702	23.2797	3.2966	19.3362	18.729	3.6454	18.3171	3.2185
EYA1	0.1876	0.3227	9.7901	2.8474	1.0737	0.0621	5.8647	11.2207	0.2028	1.0149	0.0236	0.0539	1.3513	0.0363	32.6333	0.0415	0	0.0531	1.0355	0	0.2657	1.6469	1.3904	0.0069	4.1988	2.8819	0.03	0.0035	0.0071	0.2889	0.0703	0.7484	0.0144	0.005	0.0438	0.0146	0.0315	0.0518	0.0114	0.3787	0.032	0.0297	7.2128	0.0196	2.1816	0.0796	10.3711	0.1309	0.1695
KCNS3	24.746	16.8797	0.7702	1.4333	8.0384	4.4602	5.7085	19.9127	25.8798	28.5674	52.8809	23.6234	7.9026	8.1865	1.2219	53.5853	0.5569	8.0855	9.5719	1.0178	3.0035	4.7256	9.0491	2.8432	4.7775	10.7632	11.6308	0.7461	0.9087	12.7289	11.6433	18.4229	5.5059	0.1636	12.7941	0.0763	4.7674	13.0108	9.8574	18.802	18.3666	5.5598	3.9404	2.9825	2.2816	28.1153	2.4919	4.0962	2.2519
CA11	4.9662	12.5268	7.7914	58.0153	25.5911	9.9829	30.8502	5.9217	9.057	10.5935	6.9439	27.123	34.7366	25.9707	70.0232	36.4846	12.8991	12.8553	13.6631	64.2114	35.1769	17.0044	16.1883	73.5502	22.0156	15.1633	3.4515	15.3569	5.7237	1.9558	8.6091	7.3158	41.992	2.6783	5.1151	2.645	3.8442	18.5243	3.2509	3.358	7.0891	21.0263	10.8766	38.1015	18.7784	18.3568	21.4249	10.1725	2.0297
HLA-DMB	10.7543	6.6112	12.4448	30.8684	79.7184	104.209	8.0443	14.9757	5.484	52.4085	19.446	15.6917	9.2951	3.0137	44.4283	35.3659	1.8367	13.9926	2.7942	5.7799	4.6379	15.2012	68.3283	96.3274	7.6625	86.5722	1.4712	12.0151	2.3214	0.6981	2.7159	12.1234	17.9283	0.5952	7.4197	0.6577	1.8972	30.9963	14.0943	10.0138	13.5416	26.6299	33.3713	3.2781	64.4088	17.0973	35.157	13.5646	8.5766
SH3PXD2A	37.5175	14.3828	4.1554	8.65	51.7268	19.0596	26.6462	18.2073	19.6743	18.7656	15.5418	19.3583	76.7683	63.7767	10.8473	36.565	14.0103	11.7155	34.6726	12.0508	32.1187	19.7785	16.8988	18.5046	30.1894	17.6866	42.4985	9.6058	14.8782	31.0546	21.6984	5.0949	25.8585	3.2618	6.8397	7.9709	33.6924	39.9451	68.7315	209.599	33.5685	40.5147	36.8258	38.6046	39.2548	998.698	51.9693	19.1167	38.0221
CFI	0.7174	0.7873	19.6153	8.883	0.3505	0.8747	9.6619	6.4975	0.6159	0.6102	0.7494	0.5249	0.078	0.182	23.8535	0.3737	0.0731	0.6541	0.0593	0.4082	0.2891	0.3192	0.3458	0.7875	0.6074	1.1945	0.0431	0.0997	0.3322	0.2763	2.4803	0.2909	0.184	0.2673	1.5398	0.3496	0.0301	0.1362	1.5376	5.5621	0.6983	0.4731	10.7236	0.4002	0.7925	1.9461	0.1487	9.053	0.4186
GRIK2	2.4142	0.4578	0.2986	0	0.9358	1.7527	2.0942	0.0075	0.8904	3.9437	0.6439	0.0173	0.5695	0.048	0.9713	0.0627	0.1148	0.208	0.0073	0	1.1955	1.3343	0.0293	0.0161	0.0292	0.5739	2.3027	0.045	0	0.0369	4.3263	0.0429	0.0905	0.1761	0.1235	0.2794	0.0185	0.5559	27.1508	10.4475	1.2577	0.128	0.0429	11.7798	0.203	46.7741	0.8534	0.0085	0.083
ARHGEF3	10.6792	2.0349	5.6473	8.6538	21.7094	35.8824	7.3191	29.2514	2.7563	14.6943	10.8165	5.344	15.2312	6.715	12.4171	14.3816	0.855	2.2491	5.6078	2.5416	2.1949	8.0134	11.6846	5.3903	2.9127	16.3488	2.4045	1.7301	1.0706	4.4075	5.051	7.9352	1.4459	1.0332	0.9181	0.933	1.3086	2.5068	7.4132	57.659	9.8081	12.0095	14.9687	8.1504	12.3625	7.4897	10.1902	14.8144	23.2148
KLF9	15.4556	21.1474	16.3029	18.5869	11.4913	21.7708	6.6737	25.7395	3.2339	22.5362	3.7934	6.8702	11.216	10.1987	10.8325	28.282	5.3326	1.923	2.6583	5.6136	8.1694	16.6372	5.2563	4.9331	5.838	8.482	1.1897	1.4781	1.7564	3.417	4.1241	3.0798	1.2653	0.4047	1.7028	14.4385	2.2392	2.427	68.9307	39.784	9.9245	27.2857	32.5561	42.1817	13.5525	115.181	53.01	47.8026	15.0615
PCSK1	40.8227	0.5422	10.3132	0.6372	56.2699	0.2948	14.3205	98.5556	0.2802	0.0463	0.2136	0.1706	1.0915	0.5443	0.173	0.6184	0.0517	0.2258	0.5071	0.2229	38.1282	0.1259	0.4557	0.3941	0.0345	1.1875	0.0784	0.0424	0.2283	0.7979	0.1904	0.1588	0.6698	0.0261	0.0762	0.0064	0.2099	0.0789	0.3672	50.9814	3.8795	2.6608	25.8804	0.3187	1.2521	0.4004	0.1579	1.8476	0.5407
SULF2	68.6463	32.7699	12.5487	18.1455	34.7641	32.8993	75.4024	256.029	6.1136	19.7347	7.1409	33.9527	104.079	18.4654	34.7276	10.657	6.5185	16.0145	7.8144	27.9167	99.2895	10.7207	94.496	37.6667	19.1611	17.0982	5.9801	15.0889	7.9339	26.5718	4.6941	5.1122	23.7825	2.6844	18.6419	3.2106	48.9083	15.8644	8.7445	228.247	80.3804	42.6512	45.126	9.2328	28.8172	53.9959	8.1419	34.8999	5.6466
DEPTOR	7.4627	2.0533	9.3294	2.7927	13.939	22.1649	8.4754	68.3641	1.6297	7.6743	4.5071	5.9145	6.5687	21.0398	3.1744	17.6325	4.8831	2.1557	2.6843	2.4237	6.5836	2.5272	2.9426	12.6893	3.8394	3.9118	1.6779	2.3319	0.8052	1.1367	6.0446	14.7034	0.8195	1.9132	1.9411	4.7881	0.7259	5.5165	5.3223	5.2324	8.4113	13.3455	55.8171	20.2399	4.6164	63.4999	17.964	43.9742	0.9021
FRAT2	25.143	13.3324	3.2555	9.1946	19.875	23.2466	12.9325	4.6049	12.6486	11.9886	7.5298	10.3348	25.0777	35.0277	10.1662	12.5352	6.915	12.7789	11.2858	8.9106	8.6632	10.4986	10.0472	20.8881	22.5839	14.7922	11.9374	11.4671	2.2498	12.9011	7.9919	7.3662	15.586	2.0215	15.4375	4.3201	10.8823	9.3562	6.5232	8.4093	14.0943	19.6666	17.4728	17.2303	14.0579	18.6945	7.1979	16.789	10.9668
FOXO4	14.911	11.5228	9.0642	14.7328	28.3925	20.5864	10.7605	4.974	18.7775	16.743	21.0788	29.2878	12.7685	16.6573	15.7231	28.0853	10.4362	7.3695	32.9572	9.4499	15.7294	17.6536	25.166	47.5057	7.7273	9.0252	17.5556	7.1411	2.4505	17.226	30.5391	22.8374	17.6796	5.0465	16.4688	6.7275	14.939	21.0781	23.9579	8.3832	29.0722	14.9587	37.8592	91.8485	21.9314	43.666	39.0447	40.9623	4.5682
CHI3L2	2.4023	0.4093	11.3588	1.809	9.0239	48.7162	1.2266	3.1924	0.5231	24.5743	1.5629	11.2754	2.2795	0.6027	3.3042	15.6663	0.5047	0.7676	0.5613	0.8454	0.5314	3.2584	11.4305	1.7088	0.5757	6.3118	0.5945	6.8564	0.341	0.0711	1.658	5.9904	0.3675	0.1695	2.4514	0.5173	4.4516	3.0237	7.0667	0.4331	19.8101	4.06	3.5343	2.1281	17.3114	0.1502	1.7971	0.8436	1.2387
GNG7	11.7226	20.7876	63.2691	39.4371	34.5182	35.4144	12.2523	31.9399	19.8987	18.8478	39.0875	25.332	10.1118	21.9928	61.2998	112.604	14.8755	44.9912	73.0839	98.3926	34.4374	19.7036	30.7745	69.9782	22.7971	22.2284	41.2611	9.8108	5.0384	25.6959	21.9995	16.4569	27.4269	35.9001	25.2614	18.1009	35.9227	44.2442	18.8511	3.635	19.3243	18.3971	282.611	86.8617	21.7782	49.3256	68.5324	139.942	0.8833
TRIM2	4.3512	1.735	15.7591	11.5269	9.0789	5.6796	4.6847	2.1993	5.4079	11.0835	12.1972	3.4577	7.8421	5.8731	23.6177	17.2854	0.347	2.9997	3.5316	2.1858	5.2237	22.4327	4.4839	1.5361	6.5617	10.5341	3.191	0.6601	0.8159	3.1475	26.3075	3.084	1.2788	1.5337	1.629	1.7945	0.5401	0.7528	58.5592	6.6754	3.6894	5.6228	26.7555	101.399	5.4909	29.5111	69.1023	4.9497	3.2503
UST	3.7679	3.9052	3.008	2.2638	13.6699	10.7113	9.0397	2.0059	1.7271	7.6829	4.9259	3.0741	8.5666	6.172	4.6105	12.0504	3.201	1.8889	1.1891	4.4207	5.8157	6.4339	8.4535	1.2504	3.1409	2.2248	3.224	1.567	0.3604	3.0836	1.6034	3.1038	1.3747	0.919	3.2814	1.0238	2.072	0.9937	37.3479	9.9047	3.7471	5.6654	10.1424	37.3426	0.6403	10.0642	7.7566	7.1406	17.646
DDR1	44.3652	39.6303	27.1907	32.9181	65.1698	7.6644	132.157	7.489	50.54	31.4033	15.9764	52.9922	7.7178	14.6476	22.4103	28.7242	51.9236	14.3872	115.766	33.8094	22.3725	28.4689	75.7976	157.193	16.1185	32.3479	101.824	32.5229	5.9603	51.9095	36.3482	15.7188	70.1412	12.713	24.1721	33.0933	37.7931	39.432	97.8909	129.359	93.8619	39.2473	67.9322	93.608	41.2071	21.1359	69.7047	48.9017	16.0643
BFSP1	6.3071	1.077	25.2615	2.4332	2.3318	0.5778	2.8992	4.6982	4.7995	2.9045	0.8748	12.5395	3.3703	5.9794	2.4395	37.4885	0.7752	0.3914	5.0411	3.6596	9.9697	4.0311	5.8623	0.7212	1.8803	2.3517	16.666	1.2596	0.5196	0.66	5.6397	3.382	0.785	0.4832	1.3191	4.0043	1.3924	1.021	18.1517	6.3058	9.3894	1.3821	8.1448	15.5196	1.2894	3.6955	9.6794	13.9167	0.664
BCHE	26.9648	11.8185	26.9495	0.6634	7.5334	1.5767	0.4306	4.4437	56.5762	12.8295	10.3449	15.3963	28.8595	32.2564	1.2442	110.778	18.1466	3.8122	8.862	15.0267	27.3711	34.9151	2.2893	7.4771	44.8202	2.4213	26.3048	2.0469	3.0125	8.5199	8.6545	4.3758	3.1973	11.937	0.3054	23.2242	1.5598	13.9163	138.408	8.8755	7.3289	17.6441	138.436	199.478	25.9918	733.178	7.258	67.1315	2.3786
COL6A1	711.971	1432.29	196.545	182.711	138.841	254.729	169.613	310.111	64.2879	99.349	112.547	298.737	340.465	475.333	167.573	129.099	297.254	356.44	172.826	470.553	130.974	97.7848	132.836	603.418	106.749	140.3	165.616	179.714	73.5583	92.8404	93.3441	45.2068	1804.08	31.6316	170.608	121.985	917.858	119.651	142.859	8007.92	969.038	871.377	935.826	389.833	387	1525.93	271.188	680.003	498.345
PCDH7	0.7514	0.542	37.6941	42.8735	1.4788	0.9928	30.8648	5.6447	8.016	8.2598	16.925	2.384	1.6261	6.4994	23.6628	17.8036	3.701	1.782	5.4266	9.1617	0.6519	1.0078	9.4237	4.5392	14.693	4.6102	12.8401	3.8793	0.0405	0.4207	12.369	9.0897	0.6847	2.3441	4.3896	6.9238	1.1775	6.9014	65.7569	8.3642	5.6702	16.5403	197.149	93.4909	58.8867	73.1512	100.989	121.562	61.9393
TGFB3	21.9747	14.1408	3.8653	7.1304	3.5335	13.9	2.5605	30.0401	3.7577	5.608	8.6211	8.4869	3.5041	3.0501	7.074	3.2663	3.3657	7.1055	2.9105	10.2096	2.5019	3.565	5.1746	5.3533	3.2066	8.8444	1.219	2.4389	4.436	2.4663	1.8409	4.9954	4.3021	0.2762	4.0459	0.9137	4.6619	4.4047	10.8706	87.8536	12.1201	20.6317	29.5715	6.1407	8.7533	158.823	4.2805	28.3738	15.5281
AKR1C2	2.9631	0.578	0.3729	0.0158	0.0378	1.1082	0.1137	1.6921	1.0154	0.1854	0.0681	0.6366	0.0883	0.7063	0.1076	0.1453	0.098	2.4763	0.1342	0.308	0	0.0482	0.009	0.0495	0.2721	0.0379	0.9313	4.9816	0.087	0.0725	0.7666	0.0615	0.3887	0.0576	0.1642	0.0897	4.76	0.1869	0.0411	1.4764	2.9024	1.5065	1.4735	0.0661	0.0664	0.4469	0.851	0.6191	20.5612
LAMA4	59.2349	21.7801	22.5916	21.4152	12.8629	23.0481	18.0347	72.0168	29.2772	28.8115	12.4448	42.9981	7.2993	13.3227	44.9497	84.6267	8.313	7.6119	22.3235	23.2465	9.1979	19.5986	28.1712	15.7193	11.9381	15.1709	19.4484	2.6724	7.9464	6.665	21.3907	6.2764	13.2308	3.4253	9.2907	4.5969	8.6828	12.4161	34.5688	73.3318	30.5254	27.5824	88.5932	72.0474	25.6637	373.159	27.1892	73.6943	117.152
SLC6A10P	0.0616	0.0695	0.0185	0.0114	0	0.0235	0.607	0	0	4.7963	0	0.102	0	8.2928	0.1034	2.7118	0.0088	0	0.0774	0	0.0191	0.0579	0.026	0.0143	0.0103	0.579	0.0312	0	0	0.0261	0.0813	0	0	0	0.0546	0	0	0.0135	0.0119	0	0	0	0	0.0136	0.024	0.0184	0.0135	0	0
HBP1	18.0917	4.6438	7.4908	15.6598	30.6303	24.6636	16.5982	8.8588	21.6997	16.7881	10.5738	14.8245	17.684	14.4208	12.004	22.2177	4.2626	1.8807	9.6487	2.1955	4.9745	17.1606	11.2324	10.8621	5.1123	8.5621	13.5869	1.7933	1.4067	7.2638	7.7043	9.334	2.5239	1.5404	3.0545	6.609	3.0828	5.4824	33.6201	40.0305	16.568	10.18	32.064	47.2209	23.6498	57.6743	31.3647	56.2951	8.1665
CTSF	58.8545	78.2693	67.4374	46.6901	207.705	43.8	57.3811	10.7928	159.6	139.027	17.3929	136.664	43.2744	151.066	59.2606	22.1278	78.9803	113.999	257.036	127.935	67.4176	37.1815	40.1755	145.387	31.0327	23.4943	84.7997	17.0569	7.1486	89.0354	38.623	94.9906	136.217	36.2848	275.254	56.9432	40.2863	49.0706	48.0572	26.9583	197.559	108.61	148.862	210.52	127.919	103.76	97.6404	251.613	6.2282
PCDH18	7.9017	1.2567	1.342	1.7831	1.0735	2.4882	1.7914	5.0734	0.948	5.3139	0.9282	1.3601	1.1874	0.6763	2.1134	2.3038	0.5626	1.398	0.1643	0.5952	0.8942	1.3032	1.0171	0.8517	1.0449	1.4711	0.1988	0.2327	0.3559	0.4291	0.3813	0.2969	0.9391	0.2506	0.2624	0.2345	1.1042	0.4245	5.224	19.5925	5.1806	5.6162	15.943	2.7724	9.029	39.5347	0.253	5.7289	5.8879
IGFBP5	251.864	66.5133	83.9211	148.089	61.5696	79.7762	1520.35	256.847	25.8819	127.375	17.2292	76.5688	36.1048	68.2798	225.877	15.9241	11.2238	110.847	8.09	351.173	17.0393	20.3422	43.5514	55.0966	19.7986	15.8323	2.9864	48.0627	14.982	8.2405	6.0606	20.7895	6.4923	9.6368	28.6689	7.312	10.8283	52.0246	1449.23	171.378	154.611	138.575	274.692	35.5703	86.2832	4988.6	7.4292	89.5805	208.537
ZCCHC24	34.5879	13.0077	32.1588	13.4936	21.6747	15.9672	62.8845	50.5148	17.6775	37.7115	39.5427	46.1236	12.6847	39.243	24.9404	14.6225	8.5256	7.2321	41.656	17.3432	12.0972	23.3233	24.9623	28.6704	4.9309	9.1414	48.3981	3.7241	2.1279	8.7922	13.0299	9.5731	8.5115	2.0281	13.4071	5.1928	6.4798	15.6219	59.0384	62.018	53.9706	31.9838	120.585	156.967	51.9171	284.761	102.403	72.9103	5.6076
YPEL2	4.5274	1.0491	2.2534	2.8925	4.1075	10.746	8.7154	4.0276	1.3611	9.3203	3.7283	3.9548	2.8136	3.3704	3.6606	7.6205	1.3242	0.9099	2.7103	1.5093	2.8957	4.727	3.0661	1.2501	1.7015	2.8345	2.3238	0.5625	0.5926	1.642	3.6248	2.7118	0.7474	0.2086	1.1112	2.6522	0.399	0.9438	13.7105	3.4099	5.0928	3.4991	6.7604	18.6898	4.6685	46.4979	11.7293	10.8145	1.1878
MEF2C	6.5614	5.9301	5.7566	8.6377	8.1366	43.4565	18.8971	6.6813	3.6987	24.9491	4.3847	4.875	4.1612	4.7199	6.8282	23.0981	0.5221	3.2881	1.1654	1.151	1.5512	5.8639	3.4068	2.7596	7.7025	4.3044	2.2736	0.9237	1.2287	2.2266	4.666	1.3076	1.2057	3.1908	0.8815	3.3986	0.3702	2.6865	21.812	10.7157	3.8459	11.4157	34.9199	25.1888	11.0927	147.25	20.186	24.874	4.6314
MAF	28.3261	12.0791	10.2084	3.9962	72.3951	37.881	11.8112	11.1876	6.4107	27.4826	6.9618	16.4733	22.9229	28.4246	37.656	13.4335	2.1609	10.2594	11.0085	5.6289	16.4067	24.9141	29.082	27.0502	11.9185	13.2912	14.8045	16.7366	2.092	5.8059	17.8068	14.8869	12.4444	2.8989	3.1708	2.0407	17.9046	10.9739	100.756	93.8712	25.6748	29.033	33.0105	41.3469	23.0543	21.0051	53.2933	18.9752	7.882
CHST1	8.9555	5.091	2.0387	2.1619	2.0823	5.7769	1.7953	5.8513	1.0724	2.3463	2.8017	5.4356	3.4231	1.5215	1.1294	0.9229	0.7297	1.2608	3.1465	7.1641	1.3637	6.6028	1.6567	6.3215	1.765	1.657	1.1546	1.0837	1.2467	0.5647	1.5767	0.7537	4.5753	0.4388	2.5617	0.2338	2.4101	1.8117	1.1621	3.0747	3.4813	4.1622	4.4998	0.771	4.2666	17.0622	0.4662	3.6759	1.5519
[truncated: 30 more columns]

## Sheet: Tab 2-WWTR1 High vs. Low
Gene	689c3b5e-8bff-45d0-8165-b4b0e6dbf910.rna_seq.augmented_star_gene_counts.csv	85094fa3-e9f3-4cab-8a1d-37cb0462404d.rna_seq.augmented_star_gene_counts.csv	399cd50c-1439-48a4-ba3b-a0782b2b7b62.rna_seq.augmented_star_gene_counts.csv	7688db2f-f816-443c-98d8-f8077ba0e74f.rna_seq.augmented_star_gene_counts.csv	fea785bb-de96-4411-8bf4-a7d254af9ff9.rna_seq.augmented_star_gene_counts.csv	2d8d97e6-b599-4444-8e11-73adb55be0be.rna_seq.augmented_star_gene_counts.csv	1e41697d-1d03-461d-8e10-73af2d8bd770.rna_seq.augmented_star_gene_counts.csv	e7c14078-b85e-40b8-9f56-9474543905eb.rna_seq.augmented_star_gene_counts.csv	85d43afd-9aac-48ca-a9c4-00357b7207e1.rna_seq.augmented_star_gene_counts.csv	3e1c728a-cf38-4ca8-9d87-0bbf098567a6.rna_seq.augmented_star_gene_counts.csv	7f51ff28-397d-466f-82b0-25e9c9182ea7.rna_seq.augmented_star_gene_counts.csv	4f521ce8-4aac-4ea5-abbe-732ff9ac5409.rna_seq.augmented_star_gene_counts.csv	5467227e-26db-4241-9b21-0dd8ee39fcee.rna_seq.augmented_star_gene_counts.csv	41b25e1d-b18b-427f-906c-b16f29056775.rna_seq.augmented_star_gene_counts.csv	aeac6db7-09bd-45f9-a5fd-c8358f86bff8.rna_seq.augmented_star_gene_counts.csv	a8736e1b-c036-42fd-b8d1-558724484f68.rna_seq.augmented_star_gene_counts.csv	9414ab7b-d8a9-4ccc-8fd8-1cb353257b84.rna_seq.augmented_star_gene_counts.csv	530f723a-ac5b-4e14-93b9-1d501b92fddd.rna_seq.augmented_star_gene_counts.csv	b98a06c6-3b43-4749-98cf-b28f4ba06845.rna_seq.augmented_star_gene_counts.csv	44f9e45d-d779-4865-8f10-d085d5d25447.rna_seq.augmented_star_gene_counts.csv	264656b8-d45c-4f5c-a431-366c566296fe.rna_seq.augmented_star_gene_counts.csv	3531a950-9532-4b22-93bc-f7f9551bc08c.rna_seq.augmented_star_gene_counts.csv	2d12ea90-c4f4-4aca-b353-360057b446e2.rna_seq.augmented_star_gene_counts.csv	edef6762-dd96-4284-81e6-2e128af287fa.rna_seq.augmented_star_gene_counts.csv	0b5850f2-648a-4dad-a48d-82150c12acb4.rna_seq.augmented_star_gene_counts.csv	c0054cf0-8f4b-47b6-a8fc-63a1fd36bcc7.rna_seq.augmented_star_gene_counts.csv	3711c9b4-a52b-4786-8bf8-5b6a59605c16.rna_seq.augmented_star_gene_counts.csv	b03d2223-38c1-4bb3-be8b-27db05f87b66.rna_seq.augmented_star_gene_counts.csv	b652254e-228b-40d4-be79-536ad87dad69.rna_seq.augmented_star_gene_counts.csv	69d9a82b-5c37-45bd-a1cf-ffe1392e84fc.rna_seq.augmented_star_gene_counts.csv	08e3d239-3d8a-4eee-9e08-ac2bcb3f2619.rna_seq.augmented_star_gene_counts.csv	f2903ac6-88e3-4653-a966-ab593fba51bf.rna_seq.augmented_star_gene_counts.csv	cc1c7e4b-89a0-4d94-b9e5-293c2eacadd9.rna_seq.augmented_star_gene_counts.csv	da7cbc0a-95dc-4303-a5dd-75857c066f3b.rna_seq.augmented_star_gene_counts.csv	8683d8f5-bba5-40a1-a460-ad6183d2302b.rna_seq.augmented_star_gene_counts.csv	ad2bbb19-6d02-480f-b011-d4327c3c5607.rna_seq.augmented_star_gene_counts.csv	966a66a2-8aac-41e8-8007-88fd92d2e8e8.rna_seq.augmented_star_gene_counts.csv	22e9b9d1-ac71-43f5-8606-f9f53c6ecc08.rna_seq.augmented_star_gene_counts.csv	c7d31245-5d71-4a23-8a33-4f83c4718e20.rna_seq.augmented_star_gene_counts.csv	6ca5eb09-d104-4305-b3ec-4d6e8a0c2850.rna_seq.augmented_star_gene_counts.csv	dc3154b7-6ae4-446a-8a80-91a86c57cefe.rna_seq.augmented_star_gene_counts.csv	d93b1580-c20d-4611-ac99-c0cb33f37a45.rna_seq.augmented_star_gene_counts.csv	4e64826b-fffb-4430-bc34-ea6086e89a0a.rna_seq.augmented_star_gene_counts.csv	3ca8899d-3ed3-478b-a70c-919f68969d81.rna_seq.augmented_star_gene_counts.csv	8ad884fa-e426-4bc0-960d-08db42d341da.rna_seq.augmented_star_gene_counts.csv	c2e34dda-0852-492e-9cde-3ff606259c12.rna_seq.augmented_star_gene_counts.csv	d3be84d5-9dd7-4366-9aea-532dc76f19ba.rna_seq.augmented_star_gene_counts.csv	b1f01324-d0ca-4779-9ae0-5348e2613084.rna_seq.augmented_star_gene_counts.csv	8ef24f8e-03c4-4db0-a136-7381346e9836.rna_seq.augmented_star_gene_counts.csv
WWTR	15.4649	14.8953	14.3227	14.1472	13.7952	13.7354	13.6002	13.542	12.7314	12.6667	12.5698	12.4971	12.4893	12.1895	11.9986	11.905	11.6749	11.1165	11.0062	10.0999	9.7223	9.7076	9.6186	9.5064	9.3313	9.2084	9.1179	9.1099	9.0027	8.2577	7.704	7.6188	7.0309	6.9531	6.5613	6.2567	6.0216	5.9447	5.5826	4.4823	3.7584	3.5764	3.4183	3.3793	3.248	2.7693	2.6998	2.3785	2.2714
YAP1	12.8758	23.7839	13.2728	36.9283	44.59	38.4368	38.3538	11.7944	8.1261	15.3203	9.9051	11.6591	30.2238	16.1836	13.6839	21.8218	41.3804	27.733	31.4954	10.7826	22.651	49.8767	36.9446	5.1857	58.4363	5.1026	86.1945	29.1588	51.7707	284.009	6.9025	22.2809	6.5317	18.2846	48.177	8.1416	4.1907	7.9196	4.3912	91.3351	11.7786	4.3075	5.9671	71.5548	4.7709	34.0689	10.0018	4.6154	56.5715
ABL2	28.837	29.6435	22.0865	12.7821	50.9638	8.0617	25.0815	8.346	29.6935	30.3963	5.7047	10.0473	30.1053	13.0473	22.2782	18.6589	22.9334	21.4456	26.3025	10.7779	4.5043	17.9571	16.8832	6.6273	23.2155	1.5721	12.3654	30.0053	27.1219	12.5459	9.7457	15.0025	18.2231	15.7459	16.7761	4.3836	15.4131	4.1271	5.6271	7.8294	5.0504	1.3975	14.774	14.1095	8.9843	9.1889	7.54	5.2653	11.2523
ADRB2	1.2175	29.5319	2.815	1.2039	4.8271	2.6174	3.1881	0.236	1.3555	6.4907	1.7164	1.5505	0.9006	8.4214	4.9635	2.5471	3.8588	3.5403	11.5116	1.5815	0.3061	0.6656	6.949	6.8469	11.9358	1.0249	10.513	4.0927	4.1143	9.9682	0.1806	2.4679	4.8285	1.7716	8.4932	4.2298	1.7698	50.8009	0.3048	5.3877	1.3383	5.9751	1.7731	8.1252	0.0694	3.3879	2.3676	11.8758	31.8186
ANKRD1	0.0472	0.0741	0.1532	0.0322	0	0.2282	0.214	0	0.2345	0.2795	0.7149	0	0	1.9118	0.0246	0.2824	0.1887	0.1171	0.1057	0	0	0.1663	0.8537	0	0.091	0	0	0.1674	0.2347	0.0667	0	0.0584	0	0.0569	0	0.0273	0.0337	0	0	0	0.1229	0.0819	0.9766	0.2948	0.13	0.2574	0.0649	0.1367	2.1276
AOX1	0.9998	1.6503	4.0208	0.9066	2.3035	3.3823	2.5938	0.1976	0.5302	0.0411	1.4074	0.0962	0.754	9.8384	1.5703	1.0279	1.8416	1.0848	0.4371	0.1471	0.4252	0.6054	3.8784	0.9855	0.271	0.0663	1.7312	2.8519	0.71	6.3142	0.2322	1.3049	0.0108	0.6215	0.2017	3.9347	2.3439	0.2277	0.1449	6.6156	1.0163	0.8676	0.4982	2.0675	0.0086	0.1704	3.2016	0.2865	0.832
CYR61	17.9516	406.194	60.4777	11.3124	20.6499	111.786	36.5608	9.229	9.1381	34.5351	35.3478	12.3792	30.0491	201.803	10.1767	18.3373	47.742	7.5103	15.7554	49.6089	5.6207	17.9821	12.4287	11.6568	49.1148	17.6707	35.134	76.5372	26.3887	54.5039	1.9573	79.4995	8.5977	75.9515	32.1497	76.0092	49.8833	68.1036	6.3695	5.9039	15.2841	31.5997	7.3274	128.379	1.0948	14.604	19.8038	9.6527	313.995
CTGF	52.3779	115.054	113.933	17.2758	14.8164	194.509	104.799	24.8597	20.648	78.9514	152.622	33.1527	78.9665	248.102	18.4686	104.402	32.4299	16.0479	96.9096	73.3598	6.5535	63.2518	71.1927	124.768	97.6806	28.3909	75.1575	81.656	23.7958	182.456	3.8169	189.018	14.6007	117.779	61.7162	76.1651	109.195	27.9903	5.9339	13.1702	27.6552	83.5249	19.9703	73.3194	9.4147	51.9532	77.0907	21.8807	190.999
CRIM1	2.4296	6.5235	4.2241	7.2464	3.5189	8.6015	6.1464	1.2036	1.2511	5.3305	7.7096	0.5406	2.2548	16.3951	4.9707	5.7912	9.3144	4.8294	6.2579	0.6021	3.1472	4.2526	13.9296	6.7642	30.7863	2.517	11.9015	9.6222	6.695	31.2401	1.0047	4.0424	2.2632	4.5971	10.7077	3.8165	2.3754	1.3197	0.4689	4.1057	2.8285	2.4413	2.2744	25.1468	0.4353	9.5709	3.5097	1.4534	18.6016
DDAH1	2.0359	7.4388	3.7061	3.4341	2.1662	3.1611	6.4943	5.5673	0.4423	5.8181	3.7801	1.7137	2.2233	9.1016	6.266	6.4549	3.9207	8.6594	3.8147	0.9543	9.8687	15.6438	5.4584	2.6214	12.8731	1.5742	3.9185	5.6822	1.8579	4.6089	3.9054	6.4069	1.3659	4.165	0.7269	5.8568	1.4743	0.8691	0.3418	0.8944	2.589	0.7461	0.6669	10.8122	0.1623	0.6027	1.7613	1.2985	1.887
DKK1	12.1005	0.0597	6.4813	0.052	13.051	4.7446	0.9919	0	0.756	0.1001	0.1728	0.8588	3.0951	0.7585	0.0396	1.8534	0.3802	11.3723	0.1703	0	0.1295	0.1117	0.344	5.8226	58.9674	0.5654	0.5204	22.5938	0.1351	32.8582	1.5923	0.1648	0.0791	0.1376	0.2184	0.0661	0.5437	0.2919	0.0767	0.1062	0.3961	0.7705	1.7054	0.0475	0.1676	0.9129	0.3664	0.551	0.0312
DLC1	4.0361	22.9528	5.0006	28.4536	9.3499	4.2619	17.3918	6.0933	3.9701	22.9018	7.8665	4.8115	3.4718	13.4024	11.2362	12.0286	20.4121	24.1163	61.2309	6.4697	13.1286	17.1558	48.4472	7.6518	31.4354	1.9561	8.7534	16.9416	49.3015	19.1521	1.2555	15.8096	6.2288	9.6286	66.3277	7.8715	5.7673	1.2921	2.3819	9.9329	3.3778	1.5974	6.0406	24.4052	3.1245	51.8354	11.2665	8.0481	53.2455
ELL2	3.0319	6.7157	2.4495	7.7849	8.8201	7.8839	13.496	0.596	2.4411	3.9423	5.0948	1.7483	5.0694	31.6932	4.7991	9.1134	3.9912	3.7156	13.0937	1.1197	0.6184	6.43	26.675	5.474	9.5793	1.161	16.406	25.531	17.1654	8.1162	1.381	12.823	1.491	21.0725	2.03	22.822	2.4211	7.7065	1.6737	18.8936	1.4697	3.8245	4.4987	24.3467	1.4207	3.9286	5.1843	1.0101	23.8769
EPHA2	37.9707	8.763	72.36	10.9522	7.7555	3.6199	28.3125	22.1436	15.1721	21.8314	221.273	200.174	3.9951	20.1637	51.1268	17.3522	74.0957	28.9281	9.1363	77.6482	49.2021	17.9039	23.504	11.3274	28.7356	11.069	24.3207	87.3583	9.0002	25.9734	0.878	26.5315	14.253	54.2315	9.4725	8.9929	17.2063	137.463	11.4585	43.1234	18.0571	46.1662	1.9877	10.9574	64.4718	9.0802	16.2255	9.6939	37.5734
FOSL1	108.049	24.6409	30.078	8.0726	31.3911	12.9221	28.9084	23.7304	5.4874	0.9429	84.0893	13.3858	90.5538	11.9132	20.0136	3.4444	113.875	0.3332	0.9022	128.01	13.0831	26.8244	4.0491	4.148	19.0777	12.0265	0.9715	20.9965	43.668	14.0202	5.6224	12.9692	28.5163	13.1214	0.4819	5.7311	121.405	268.44	2.6013	0.3498	63.0229	24.6412	20.6902	1.2862	22.0966	5.763	30.1239	13.447	13.5039
GADD45A	16.6173	121.071	19.6799	19.7233	17.7385	24.2732	57.795	14.0065	29.0395	14.6146	24.0973	18.6764	19.1895	26.3918	28.353	33.8012	15.6585	40.7784	13.9787	21.2928	30.8137	31.4765	11.1137	15.1154	74.2965	5.7781	25.8381	39.3742	32.954	21.158	4.2409	19.2871	15.3607	30.912	16.5347	28.1661	8.281	6.752	15.0161	71.0133	13.9952	7.442	55.018	29.6832	34.1345	5.362	25.8155	5.0861	78.021
NAV3	1.8426	2.9692	1.7552	2.4466	1.323	0.8798	1.955	0.2535	0.959	1.9513	0.9252	1.1971	0.8818	1.1736	1.7669	3.7473	6.4097	2.4942	5.9836	0.8991	2.4688	0.4074	3.9882	2.9645	2.3493	0.277	1.903	2.2393	8.0771	2.3523	0.2813	1.469	0.7408	0.0537	3.0318	0.6781	0.5139	0.2099	0.6469	2.9973	0.4265	0.2946	2.304	7.5657	0.7886	0.6663	1.5583	0.341	0.9387
PAWR	0.2089	5.2594	0.2973	0.2602	0.9808	0.7793	7.4228	0.8447	2.0995	1.3213	1.8534	0.7018	0.6945	7.3696	2.2561	0.4071	4.672	11.9802	3.6628	0.069	3.9581	3.5723	0.8462	0.6493	25.3948	0.4357	1.3619	1.546	5.4446	1.4347	1.6167	4.5943	3.0521	0.3579	0.2577	3.4165	0.7018	1.3494	0.4109	2.1962	1.2923	0.9202	2.0405	24.2802	0.3713	0.0799	0.1361	0.375	6.1677
SH2D5	0.5085	0.9161	1.4666	0.2829	1.2847	0.2276	0.2882	0.6441	2.9938	0.2726	1.7397	1.4943	0.2357	0.1291	0.206	0.0966	1.3925	4.8583	0.7589	0.6208	0.2106	0.1659	0.0917	0.67	2.2508	1.2095	0.2132	2.6039	0.8694	2.7684	0.6777	0.2797	1.4224	0.5677	0.2973	0.4799	1.3861	8.3723	0.2279	0.4834	0.1715	5.1215	1.2175	0.1764	0.7156	0.3697	0.8031	0.0182	0.9722
SMURF2	5.0675	8.3888	5.4295	14.1753	7.7023	5.0963	12.1044	1.5644	4.0157	2.2199	13.7492	2.8528	3.2466	14.0357	10.6424	16.9303	10.0318	9.2265	10.9296	2.9792	6.9649	15.5762	14.1048	3.8059	16.0455	1.2498	6.3044	10.2901	18.979	6.4829	1.3517	15.0433	4.0345	5.9048	4.6901	5.8277	1.825	0.5437	1.6588	4.6023	2.5688	0.3186	4.0091	25.9087	1.8194	3.6925	4.5931	3.6706	10.1567
TEAD4	57.2089	45.8116	40.8973	23.5877	47.2002	14.7219	7.1366	82.927	34.1055	41.522	42.13	42.9632	34.7989	18.3512	42.1584	9.5231	51.3651	48.1869	18.5009	39.7073	16.088	40.9434	9.1714	111.32	46.1473	53.4256	38.6632	11.8189	33.9517	59.9302	9.545	12.0216	63.9065	14.1083	73.4187	11.6798	67.7346	22.0407	8.3757	37.537	23.1525	23.5549	15.4645	17.5793	9.3481	119.666	32.5997	30.4664	17.3491
WWC1	0.5868	0.7234	2.1258	0.2003	1.8568	1.503	7.9426	7.2926	0.7217	9.1544	0.514	4.0647	1.1014	3.8381	1.2137	8.4021	9.5638	7.5573	2.8144	0.5921	3.2513	5.7441	1.0377	0.0338	1.5187	2.9583	5.4829	0.8766	6.3397	7.973	1.0785	0.5446	7.3177	2.7035	11.3653	3.0918	0.8085	3.0252	0.896	4.0176	2.7812	4.7866	0.8308	2.2503	0.7385	1.4534	0.6514	0.0971	3.1318
ACAT2	26.2603	15.7937	12.5718	12.9002	11.1086	9.1006	30.5615	3.5407	17.2325	4.3822	3.2731	12.7911	20.2379	22.3036	11.8254	28.0219	43.6083	0.9134	8.4763	36.6431	11.9389	11.7716	14.521	5.5451	5.1541	4.2318	4.4853	13.7646	23.9471	4.277	3.1686	11.6118	47.5258	2.6834	5.192	8.6225	6.4295	7.8483	1.0721	6.1646	14.2922	4.6318	2.5117	8.377	2.6275	5.378	19.0512	3.2463	6.0087
ADAMTS6	0.0789	0.387	0.08	0.3975	0.5192	0.6724	0.5871	0.0231	0.0735	0.1428	0.1643	0.0135	0.0617	2.4956	0.0617	1.2479	0.1282	0.3181	0.4417	0.1394	0.0623	0.365	0.6794	0.0397	0.4755	0.0314	0.1396	0.5247	0.2382	0.2231	0.2431	1.0929	0.041	0.6424	0.0142	0.5028	0.148	0.0303	0.0637	0.0661	0.1797	0.0343	0.1446	0.1848	0	0.0108	0.1154	0.0667	0.1536
ANLN	26.8886	12.3967	18.2427	38.1595	12.642	5.2988	34.4363	7.6386	20.463	16.3635	2.742	6.7564	23.7445	22.3158	11.4058	18.4606	20.4149	24.8161	31.4963	6.7021	18.9532	27.0013	9.634	2.8847	14.2603	4.3003	3.7548	29.2368	89.0877	9.9185	4.7342	17.0385	26.8112	6.3035	5.1559	10.6079	9.2734	1.4215	6.332	3.1688	4.5474	2.5764	4.0447	4.8652	3.8489	7.1613	6.8134	1.6666	1.9744
ANXA2	293.602	716.197	96.2646	85.6243	392.397	216.52	223.012	105.45	129.833	149.345	159.061	99.5709	673.902	186.879	406.783	169.229	376.003	128.357	180.921	102.667	30.2564	60.8973	135.779	235.556	97.3929	162.276	108.799	148.771	120.171	339.142	63.5213	116.075	299.696	118.594	109.793	203.164	159.58	151.971	78.5033	118.289	168.088	162.235	87.1452	115.907	67.8943	21.4673	224.079	350.396	139.643
AXL	12.7576	17.6572	12.3725	22.6691	29.1171	10.9231	16.9221	2.7377	1.8261	4.191	20.613	5.4603	13.9194	10.4391	7.0902	32.8309	33.2536	4.6339	8.0048	3.8756	0.6801	10.4972	106.558	6.0321	7.123	6.7878	15.285	25.8506	17.0555	29.3366	1.6931	21.7156	1.6195	6.6586	6.2705	17.2521	22.2053	5.259	0.7171	3.6555	9.4562	4.5903	3.2206	8.1906	0.3354	3.2491	35.7068	6.3569	15.7532
C12orf75	6.6217	3.3482	2.9696	2.7854	6.0953	8.3266	4.3749	1.6319	1.7666	1.7342	3.3738	6.0527	8.1629	21.915	6.4561	4.3443	34.9898	12.4146	4.759	1.4777	5.7201	13.6732	9.0355	1.0742	1.361	6.2953	2.9895	11.8199	4.5463	9.0922	1.4605	10.1168	12.8064	3.4053	5.2455	6.5598	2.6682	3.1895	1.6075	0.9806	2.8583	2.8505	7.9792	0.862	0.7085	0.8213	14.59	0.5908	1.2856
CEP55	29.2111	8.8103	6.5402	30.3321	16.9982	4.952	17.0558	4.319	15.8168	7.5855	1.9442	3.7937	13.7724	41.7847	18.2697	7.812	20.6786	19.8717	11.4816	4.1113	6.2534	21.2614	9.4475	1.396	8.0927	7.4273	5.8129	22.8491	44.3142	4.4277	8.2152	11.218	14.0022	6.5018	3.8871	15.2708	7.5042	1.822	5.5621	4.6854	12.1456	2.3771	9.141	5.2905	3.1109	13.3857	8.5833	1.6859	2.1882
CLDN1	1.4676	3.7401	9.976	124.897	2.754	1.8126	64.1169	0.4583	7.0195	1.6244	0.4762	1.1471	3.8104	1.0158	43.5669	97.8548	0.9542	0.4911	86.0324	4.3875	139.288	36.0698	0.5184	41.0543	0.1571	3.0782	7.4919	54.7274	1.4226	20.9218	1.0021	0.8216	0.1775	93.0745	0.1337	0.3237	1.1318	25.6497	0.0658	0.2729	0.1515	17.9376	0.0201	4.6973	0	0.4064	0.817	10.2663	0.6871
CNN3	115.716	176.415	56.6999	420.308	242.948	40.6829	354.835	60.8756	31.2235	75.2773	83.5244	138.697	157.733	88.8166	82.5435	238.188	353.054	188.068	144.033	84.0794	75.7201	169.702	102.892	32.4664	130.233	72.4721	106.216	123.312	204.394	143.152	5.4393	221.271	101.2	140.959	102.171	107.224	44.0881	20.8942	57.2491	92.5636	53.855	11.648	6.6742	76.5728	43.0246	23.5119	81.8477	51.6279	180.488
COL12A1	20.0332	83.7491	14.9435	3.8689	7.0497	25.4136	9.8947	8.5795	12.7059	1.2382	30.82	0.6019	19.9701	15.8872	3.6953	44.9337	19.6693	5.5412	30.9444	4.3674	5.4461	41.392	29.3235	2.1083	4.7304	21.1441	21.5188	7.9739	2.6154	133.96	1.1306	29.1646	2.5189	9.8849	3.6134	7.0954	8.586	4.3622	0.598	0.7102	7.4832	11.3588	2.2349	5.1819	0.3467	1.1739	6.7095	1.5458	0.71
CPA4	0.1601	5.8962	0.0462	0.2624	0.3606	1.3002	0.4235	0.14	3.005	0.0421	1.5842	0.0292	0.7825	0.2394	0.1112	0.1095	1.3013	0.2118	1.4697	1.0054	0.7784	0.2508	0.1188	0.0573	0.4939	1.2238	0.4733	0.0946	0.3791	7.8007	0.0585	1.9025	0.0888	3.411	0.046	1.1251	1.4188	14.4948	0.0258	0.274	0.5834	60.1968	2.2084	0.0133	0.0235	0.1397	0.0734	0.2371	0.2099
CYTH3	129.222	343.281	220.143	156.87	139.769	56.3931	55.5783	113.57	170.103	126.036	203.239	116.358	123.952	16.4068	54.9213	173.865	257.297	67.9747	44.849	125.523	89.6455	27.3502	86.7041	54.483	38.6059	76.6186	25.0874	49.8537	69.3155	78.4238	27.9469	50.4559	82.8594	15.8857	195.483	26.1272	44.476	32.6304	74.4897	22.0752	51.3839	18.9244	29.422	92.0049	27.4585	72.3886	74.0542	19.8638	41.2508
DIAPH3	3.6173	5.2742	0.9161	8.0499	3.6286	0.6417	5.0468	1.7	1.2888	1.3555	0.5373	0.4228	2.7114	5.5977	3.2313	3.3061	3.591	6.6718	9.9926	0.7546	14.4437	11.151	3.4152	0.2458	2.2063	1.3972	1.2848	4.0578	8.7548	1.2214	0.5148	2.394	2.9344	2.5325	0.5912	2.2734	1.7584	0.259	1.0619	1.1049	0.9383	0.2848	0.5624	2.737	0.4601	0.4119	0.8581	0.5747	0.5721
EPAS1	71.3047	55.0199	56.1026	44.5638	70.3713	38.8949	36.6538	72.9404	10.8146	31.9974	67.2908	31.2748	34.5123	106.774	26.5568	48.0586	72.4706	39.5298	28.6955	40.4988	5.8538	49.6591	78.7741	118.947	19.873	32.4794	27.0415	38.7683	83.3518	141.859	9.0074	20.448	31.1517	44.7067	108.448	21.9338	38.9492	25.5532	5.3204	48.6872	21.0694	38.1841	26.8343	50.3513	9.7081	100.452	74.114	35.1439	31.2078
EPB41L4B	0.1448	0.0617	0.3306	0.1758	0.1951	0.4821	0.2188	0.1206	0.3641	0.9244	0	0.1761	0.0959	0.4076	0.0056	0.44	0.0536	0.3857	0.5042	0.202	0.5996	0.0252	0.0373	0.5471	0.3101	0.222	1.3556	0.1426	0.0686	2.3118	0.1258	0.2057	0.2304	0.097	0.1462	0.0435	0.0153	1.0367	0.0519	2.6513	0.1256	0.9991	0.037	0.3415	0.0059	0.269	0.0148	0.0155	1.3007
EPG5	9.0515	26.4518	13.8392	22.5047	22.1032	6.0002	5.3335	14.3289	18.0795	4.5718	13.612	11.316	20.6708	15.9474	8.6236	15.5216	26.0925	8.7324	16.7398	10.3182	6.8722	9.5419	20.0723	6.9237	9.6277	9.1202	5.6922	10.5554	39.7773	12.5443	2.6696	7.1945	10.5549	6.7199	14.4878	5.4958	8.8133	1.6289	5.1416	7.0508	11.9573	5.2882	10.8385	27.6679	4.8197	7.0748	16.353	3.5744	11.2616
ESM1	0.4866	3.021	0.8148	17.8976	0.9381	0.8193	14.0192	0.7648	0.2339	3.2219	3.5414	0.3221	0.3367	0.8018	1.586	20.0125	2.1641	3.971	3.3905	1.6261	8.9114	32.9789	1.179	0.611	5.2039	0.6331	0.3701	4.368	1.8727	0.2662	1.4733	3.9627	15.095	5.4694	2.3197	1.7633	0.7626	0.5177	0.3672	0.543	1.2663	1.2351	9.0374	1.2739	1.8324	0.9586	0.842	0.2425	4.0898
ETS1	75.6528	102.352	85.5026	122.634	105.135	34.474	53.239	44.2724	18.4574	72.032	23.2517	33.7717	193.804	368.527	41.4238	61.0443	177.075	67.8171	97.8117	26.7191	33.4242	102.915	175.492	44.5488	56.8499	17.0893	90.039	139.851	173.457	55.9443	6.8794	41.2401	44.3018	47.7255	54.343	53.9112	41.353	9.6708	11.1479	77.3243	18.6424	8.0703	11.707	63.0786	14.8416	22.289	74.8707	24.6802	193.039
F3	1.7131	1.7612	4.1011	2.4792	2.3207	3.7504	1.5765	1.7697	7.2485	6.0878	0.8646	0.7811	2.539	3.7032	1.5557	1.6515	1.2873	0.3268	3.9	1.3789	0.7686	2.8028	1.7921	0.3931	1.2982	2.2068	1.1738	8.9793	1.622	16.7614	1.2139	4.4755	0.3855	3.6012	2.3108	2.6451	2.9919	14.3869	0.2717	0.8333	1.6765	11.4187	1.0348	3.7295	0.0161	0.7025	1.6514	0.7492	10.1011
FJX1	9.1328	13.4287	3.001	4.2928	6.617	12.6641	6.4295	11.7494	1.9192	1.5714	10.1319	7.3032	12.6217	13.4571	1.8294	8.9746	9.0539	2.3958	2.0835	9.7585	3.6195	14.3141	1.4413	1.2966	10.0201	7.0649	2.4184	2.3347	1.796	13.5028	3.8876	7.3027	4.5996	4.0867	4.4853	1.1796	2.9363	8.5275	7.0413	0.9015	4.319	6.828	2.5128	3.9691	0.8317	6.2436	2.8989	1.2378	4.0867
FSTL3	62.5141	29.4077	16.4983	25.0552	73.2517	14.0053	19.0593	78.8459	19.9765	38.0008	24.8504	20.2579	133.624	45.8945	9.6652	20.4531	18.4845	30.3735	12.24	21.1241	11.4308	16.0181	13.8942	5.0305	65.0125	29.5155	39.342	19.1872	16.9975	57.5936	11.9543	10.3102	21.2166	16.0248	23.1474	9.9548	38.8017	24.8145	12.8909	19.0919	6.1815	68.335	26.9698	12.7858	8.1473	96.9304	13.8935	66.5662	137.552
GADD45B	13.6771	34.6894	34.2202	40.5365	21.0554	58.1526	27.9114	6.5741	12.4678	11.5983	57.1593	7.8402	33.9902	56.9068	52.7037	25.5022	37.2406	7.5981	10.1087	40.5765	3.2278	18.9634	40.2733	22.1519	15.8475	23.7465	32.3608	59.2728	32.057	35.8377	14.4697	28.421	8.0517	37.0542	23.0825	60.8825	53.5478	45.3293	5.8035	19.6072	33.8939	27.1682	41.9053	11.3518	3.9179	27.9756	57.3885	12.3454	22.0234
GFRA1	0.267	1.0753	2.2139	7.6023	0.4394	1.1571	0.6658	0.0751	0.0295	0.1991	0.6402	0.0974	3.254	7.8568	0.0232	0.502	5.3799	0.0773	0.1046	0.3772	0.0606	1.1185	0.6252	0.1374	0.3603	0.0803	1.9518	1.2305	0.4677	1.3271	0.0766	0.4957	0.0863	0.0161	0.8428	0.0052	0.903	0.0717	0.639	0.1589	0.7933	0.1442	0.0844	10.5744	0.0098	0.2038	0.1469	0.2449	9.2836
GNGT2	0.7506	0.9159	2.2998	4.4412	4.8105	3.2163	3.6012	0.5392	0.29	0.823	5.8338	0.8213	1.7443	10.3486	3.6745	2.6509	6.3987	0.8067	0.7	0.9424	0.0243	1.0577	8.5952	1.5448	1.6395	2.6554	2.2181	10.9086	3.1625	1.7679	1.0958	5.5729	0.104	2.0511	1.2563	7.6488	2.86	2.2069	0.3027	1.7309	2.7019	0.579	1.2507	0.9059	0.1653	0.3274	10.9087	2.3912	0.533
HBEGF	9.4123	12.3876	9.4912	22.2699	16.2307	10.1769	16.4822	8.8587	5.6158	28.2457	10.785	14.8658	3.6634	10.0363	4.7107	20.8438	7.6809	19.1732	23.5668	7.187	11.8974	23.5844	12.0497	12.1596	14.3281	6.9	11.1566	15.3801	6.3829	12.2436	1.4702	9.5841	7.8724	8.8092	11.8415	5.2535	11.1273	131.418	0.855	14.0359	2.7399	9.4026	6.4557	34.2506	1.7743	19.2025	5.2485	1.7464	22.5796
IL11	3.787	0.2641	1.331	0.0862	0.3075	0.5491	0.1073	0.2366	0.209	0.0415	5.0173	0.1079	0.9027	0.2359	0.0164	0.1888	1.9232	0.0391	0.2119	1.3374	0.2761	0.5374	0.2414	0.0212	0.7299	0.1842	0.1191	0.1678	0.1121	1.5164	0.037	2.4994	0.0656	19.728	0	0.1645	0.5411	6.8263	0.0764	0	0.2053	0.2373	0.272	0.0788	0.0348	0.0688	0.0651	0	0.2327
IL12A	0.1945	0.113	0.1403	0.1771	0.1685	0.8148	0.4165	0	0	0.0853	0.2618	0.0296	0.0386	1.2926	1.2383	0.591	0.2159	0.1072	0.121	0	0.6934	0.1523	0.8418	0.029	0.1666	0.1376	0.1223	2.2603	0.1535	0.0611	0	0.2675	0	0.5733	0.062	0.9011	0.0309	0	0.0174	0.0724	0.0844	0.025	0.149	0.027	0.0238	0	0.446	0	0.1063
IL7R	0.4422	0.6828	14.5445	3.2397	14.8279	7.8771	4.7654	0.1052	0.2208	0.6465	3.3054	0.5953	2.3591	152.151	3.9263	0.9957	32.7073	0.2437	4.4464	0.1983	0.0341	0.8985	16.4997	1.3662	2.76	1.3857	5.005	45.4232	11.6043	2.5495	1.2243	6.1587	0.0292	5.6786	2.6184	7.0964	2.5377	1.1899	0.0963	6.4622	1.1051	0.065	0.2178	5.3287	0.0232	0.199	2.5296	0.3456	3.5427
ITGB2	6.1272	26.208	52.7568	114.041	116.557	34.256	63.6574	5.568	3.1677	29.7461	426.761	12.5211	27.2847	213.752	48.7769	58.0341	131.056	22.7643	19.725	35.8031	2.3681	11.7976	362.374	39.3048	29.1212	45.6138	39.6862	181.719	151.232	31.5685	5.0908	90.0219	2.7363	37.4553	20.5738	180.081	101.804	19.8799	1.4143	24.0131	39.7651	6.214	4.9628	17.0673	1.3075	6.3998	257.579	28.0025	20.3831
KRT80	1.9463	4.3044	0.3351	0.0264	1.2454	0.2901	2.3266	0.4173	6.3327	1.9875	7.4333	3.0993	0.1212	0.9892	0.1412	0.6288	2.6119	0.1681	2.4708	0.4559	0.0377	0.1365	0.1886	0.156	2.0716	4.1417	5.6165	2.7803	0.0688	61.855	0.1742	0.5512	0.0403	0.1167	0.0139	0.1458	1.0239	142.27	0.125	0.0648	0.063	502.829	0.2337	0.1088	0.064	1.1826	0.4662	0.4768	0.8727
KRT81	0.241	0.3895	0.0474	0	0.3415	1.9268	0.2731	0	0.0363	0	0.0995	0.4495	0.1175	0.0819	0.2282	0.2995	0.569	0	0.1471	0.2063	0	0.0772	0.2437	0.1764	0	0.2325	4.1941	22.8689	0.0933	2.4767	0.1713	2.1958	0	0.0264	0.0943	0.2283	0.0939	0.3193	0.053	0	0.1995	0.6337	0.151	0.1641	0	0.3344	0.0301	1.29	0.0359
LAMC2	1.3669	0.1893	3.6451	0.2301	0.5352	0.3017	0.573	3.7721	6.4073	6.2415	0.6521	0.2134	0.0223	12.9712	0.0975	0.2133	5.9864	0	2.878	2.3512	0.1881	0.2052	0.573	0.3184	0.1203	1.8549	1.2186	1.4935	1.4273	30.5658	0.3076	0.6488	0.0259	0.0527	1.4149	0.0795	1.3022	5.9511	0.0352	0.0348	0.2355	13.2309	0.0108	0.9352	0	0.4084	0.2146	0.0844	0.2762
LETM2	0.2834	0.5639	0.5456	0.9815	0.8351	0.3607	0.5718	0.4533	2.117	0.4547	0.3453	1.0399	1.1367	1.1022	0.3096	0.6378	0.8148	0.9942	1.6321	0.6509	0.3494	1.25	1.0094	0.2319	0.5861	0.4255	0.3324	1.372	1.0405	0.6349	0.2108	0.479	0.8523	0.575	0.5652	0.4402	0.3457	0.1962	0.1673	0.3779	0.2338	0.2079	0.6195	0.4401	0.2588	1.5677	0.9697	0.1668	0.3737
MB21D2	2.7868	4.3867	0.9548	0.9419	5.3052	1.2668	1.1258	0.9048	0.3426	7.6237	1.3578	7.1897	3.4034	3.661	4.3398	2.7349	10.0338	2.8057	9.0168	0.5197	1.1533	1.4095	2.1299	2.148	2.925	1.435	3.6432	3.9857	4.1147	7.6039	1.3057	4.012	1.644	1.2308	5.0077	3.0195	2.2671	1.5026	0.8903	4.7724	1.2745	1.2291	0.9037	1.8087	0.1519	3.1292	1.2144	1.1188	7.528
MFAP5	4.5853	25.0715	14.3475	0.2374	0.4658	32.5264	1.9827	1.9547	1.3313	0.0429	7.897	0.2973	8.1388	3.5468	0.6791	4.5495	0.5428	0.1617	9.9837	9.3117	0.0211	15.4018	24.1202	0.6709	0.2932	2.2719	15.3412	0.5007	0.4938	17.1375	2.3201	20.5325	0.1656	0.3668	0.3274	8.5186	3.1829	0.9001	0.9992	0.1334	26.3666	3.5077	0.5432	3.256	0.1915	0.0711	2.5706	3.0211	1.5312
MPP4	0.5149	1.4452	0.0371	0.0117	0.3456	0.0249	0.5739	0.0241	0.0853	0.0903	0.039	0.0235	0.1688	0.0214	0.0447	0.0293	0.9602	0.0426	0.0672	0	0.2169	0.0302	0.37	1.509	0.9428	0	0.5909	0.0913	0.0244	1.6616	0	0.0106	0.2022	0.0517	3.1766	0.0199	0.0245	0.0132	0.1592	1.0534	0.0447	0.1192	0.0296	0.0321	0.0284	0.2433	0.0236	3.7697	1.6453
MPP7	0.1713	0.2652	0.1334	0.1591	0.2314	0.3974	0.1476	0.0321	0.2723	0.1713	0.0726	0.1031	0.0612	4.2257	0.1356	0.0234	0.575	0.136	0.4754	0	0.0133	0.0724	0.8291	0.0276	0.4094	0.1236	0.5687	0.4979	0.3503	0.5617	0.075	0.212	0.5792	0.1239	0.0688	0.2777	0.049	2.0603	0.0166	0.6576	0.4903	0.7294	0.5788	0.7101	0	0	0.0471	0	3.3123
NLRP3	0.6935	1.1438	2.5767	2.865	3.5113	1.6843	1.4409	0.125	0.2797	0.6083	4.1731	0.4378	1.2874	4.2866	1.1113	2.2943	3.5706	0.7056	0.6666	1.2559	0.2333	1.0441	8.8909	0.7041	1.1481	0.9247	1.0314	5.3261	2.8284	1.9601	0.1947	2.1344	0.1355	1.908	0.4082	2.1621	1.8294	0.341	0.3658	0.7242	0.5784	0.2263	0.2759	1.3987	0.1175	0.2715	4.3412	0.4806	3.6276
NPPB	0.0597	0	0.1936	0	0	0.0577	0.2029	0	0	0	0.3615	0	0	0	0.1243	0	0	0.148	0.0668	0	0	0.1402	0	0	0	0	0	0.4231	0.0848	0	0	0.0739	0.0827	0	0	0	0	0	0.0481	0	0	0	0	0.0745	0	0.1302	0.3284	0	1.7604
NUAK2	2.567	2.9066	13.1259	4.3731	11.7211	4.9866	8.6012	1.0625	1.4443	6.8863	14.2267	6.0511	2.4505	42.4776	6.3473	3.7056	22.3844	2.3489	2.3011	1.7603	0.2544	1.5805	18.199	4.7001	1.3931	4.7085	5.0891	15.1295	10.9023	11.9229	0.6043	6.7081	2.1584	4.8227	3.6473	8.2689	16.6493	110.821	0.5026	3.8519	1.3782	29.8034	1.0525	3.3141	0.3019	4.4572	19.7627	2.2737	2.4504
OXTR	0.0655	2.115	0.0304	0.5241	0.1824	0.7782	1.4854	0.0439	0.0775	0.2587	1.2473	0.0128	0.1171	0.8281	0.3023	0.6239	0.2806	0.1857	1.0791	0.7053	0.5278	3.507	0.8724	0.0754	0.5413	0.0397	0.0883	0.5641	3.7759	0.172	0.1904	0.753	0.6097	0.3047	0.2283	0.7697	0.1605	0.0144	0.0755	0.0731	0.1583	0.065	0.9198	9.4792	0.0928	2.8991	0.3348	0.0181	0.9818
PCLO	0.1792	0.1913	0.0819	0.0782	0.1032	0.2625	1.7274	0.0052	1.0491	0.7632	0.0056	1.5313	0.0033	0.8424	1.8473	0.0158	2.8127	0.6644	1.5548	0.0696	0	0.0998	0.0128	1.158	0.5768	0.1843	1.1221	0.0295	2.8966	0.1462	0.0477	0.0366	2.7697	0.1225	0.008	0.0021	0.6679	0.0496	0.3085	0.7607	0.1178	0.451	2.0667	0.03	0	0.0121	1.4331	0.6617	1.4864
PKD1L2	0.6598	0.7968	0.1349	3.2756	2.168	0.2038	1.1949	0.1041	0.03	1.4111	0.7862	0.3505	0.0041	0.5734	0.1417	0.2015	0.2945	2.4068	0.3882	0.6192	0.4518	0.3568	0.2428	0.2648	1.0751	0.2406	0.1198	0.2291	2.2252	0.3877	0.2199	0.3143	0.1037	1.9409	0.0488	0.4122	0.013	0.0783	0.1317	0.21	0.239	0.2938	18.4709	1.557	0.9488	1.1819	0.106	0.1204	0.8323
PKP2	0.0546	0.0444	0.3344	0.149	0.1812	0.293	0.1168	0.0284	0.4517	0.3669	0.5232	0.0166	0	2.8627	0.0379	0.2797	0.7753	0.3609	0.5428	0.2284	0.0118	0.0142	0.3542	0.0407	0.1052	0.0579	0.4403	0.591	0.1808	0.634	0.0474	0.03	0.5292	0.0219	0.087	0.2879	0.2252	0.4046	0.0245	0.3315	0.0868	0.2666	0.0105	0.4769	0.0067	0.1587	0.0834	0.0585	2.881
PRKAG2	2.1608	7.2862	2.2478	0.6182	2.3928	1.8673	1.4111	0.9087	6.9977	1.1745	1.5502	1.418	2.7224	6.4611	3.5128	1.5343	3.3461	3.2985	3.0891	0.4845	0.2401	0.7069	2.501	0.5973	2.4543	1.1249	2.3606	4.3132	2.4844	2.5921	0.9537	1.076	2.7981	2.8874	2.4506	1.7933	1.9408	0.4795	1.5439	5.0608	1.0208	0.5238	2.2171	7.5446	0.3824	0.5274	2.6077	0.7599	4.8518
RAB3B	0.0595	0.0761	0.0465	3.6255	3.5439	0.1246	0.4047	0.0186	0.3504	1.0572	0.2303	0.0136	0.2955	0.2719	0.0034	0.2938	0.0727	1.1727	0.3219	0.4048	22.8017	20.716	2.2075	2.33	0.3888	0.0597	0.0655	0.1582	0.0657	0.2477	0.0103	0.5401	0.0092	2.3042	3.8094	0.1034	1.3371	0.1395	0.064	0.1254	0.0129	0.0115	0.0171	0.0743	0.0036	0.0505	0.0182	0.1628	0.2276
RAPH1	0.9453	0.464	0.9987	1.8171	3.3113	0.1687	0.408	0.4122	0.1746	1.0094	0.3138	0.5023	0.5655	0.9286	0.3106	0.7829	1.5111	0.3607	1.9044	0.1027	0.1944	0.4782	0.7636	0.2538	0.6307	0.247	0.9705	0.4447	1.6576	1.2795	0.1081	0.045	0.2015	0.206	2.1388	0.16	0.426	0.1143	0.0821	0.5924	0.0804	0.1388	0.1379	1.0078	0.1081	0.2379	0.4101	0.0597	0.4588
RFTN1	31.7921	22.4193	28.3637	12.4017	16.4383	17.6344	36.0729	2.7978	2.8314	5.7476	14.1945	8.4356	14.763	133.83	68.308	33.1933	40.6851	5.2303	7.8836	5.0067	3.032	14.131	40.6946	9.3244	5.0381	8.3135	13.9812	40.2045	14.4345	21.3635	3.6939	18.1034	2.0381	14.6996	8.8735	27.7971	15.295	10.6434	1.208	4.756	6.5023	12.4054	5.4069	10.3221	0.7709	4.9665	22.3398	5.1069	3.6009
RGS7	0.1804	0	0.1419	0.0448	0.0639	0.0634	0	0	0.0543	0	0	0	0	0.4292	0.0342	0.028	0.1967	0	0.0734	0	0	0.0193	0.0913	0.022	0.0316	0	0.0619	0.0291	0.0699	0	0.0128	0	1.5002	0	0	0	0.0234	0	0	0.0366	0	0.1518	0	0	0	0	0	0	0.0538
RNF144B	16.2048	23.7876	10.1983	7.7106	69.8886	3.7203	20.2649	0.8193	11.9606	12.8057	18.0403	7.1427	8.4146	20.9019	9.8655	12.1781	133.81	10.296	83.9289	3.8479	5.7593	8.6371	20.4477	20.6871	11.183	4.1112	34.1742	34.5588	19.069	30.8013	3.1639	9.5767	14.1768	2.2168	52.3613	11.7724	7.4383	6.9013	1.6678	30.2204	7.1345	4.3211	3.0708	24.9062	0.198	11.6381	8.5987	10.5637	11.8911
SFTA1P	0.093	0.0972	0.0718	1.0336	0.5521	0.2054	0.3161	0.1244	0.044	2.5161	0.1408	0.1453	0.0237	0.0662	0.249	0.1589	0.3184	0.0329	0.104	0.8754	0.284	0.2027	0.314	0.0178	0.1536	0.1128	1.0521	0.1648	0.0377	0.1126	0.1039	0.1808	0.2392	0.032	0.1143	0.0615	0.0569	0.1528	0.1286	0.1037	0.1901	0.0154	0.206	0.0332	0.1316	0.0869	0.2009	0.141	0.0435
SGMS2	0.1937	2.1304	0.7182	0.7709	1.4093	1.3428	0.9974	0.7416	0.2657	0.8884	0.8464	1.0447	2.7901	1.1309	1.0608	2.9038	0.6303	4.118	1.6972	0.6776	0.0968	1.5209	3.287	0.4977	2.3895	0.376	0.9709	0.6278	3.6788	1.2671	0.4112	1.726	0.6979	1.2812	0.2144	2.0317	0.1661	0.7896	0.1116	0.3088	0.6481	0.3458	0.7537	2.9991	0.0183	0.7967	0.6318	0.1389	1.5327
SLC8A1	0.4684	0.3629	0.2981	1.5556	1.2646	0.4267	1.0967	0.0181	0.0638	0.1623	1.004	0.3876	0.2205	1.9092	0.3373	1.4001	1.0669	0.3729	0.2265	0.1089	0.326	0.2354	4.3594	0.238	0.4347	0.0798	0.38	2.1353	1.4345	0.4304	0.0694	1.3096	0.219	0.3672	0.1272	1.5559	0.4104	0.0517	0.0466	0.2624	0.2132	0.0089	0.0631	0.5006	0.0127	0.6684	1.62	0.147	0.2969
TGM2	35.3184	26.7207	56.1855	45.265	56.0377	30.4585	26.2483	6.3763	23.9081	53.5073	188.904	25.4242	13.0021	47.0827	11.5024	44.195	19.9929	8.2546	3.9152	27.9885	1.044	15.6218	60.1275	17.12	9.7351	44.816	23.5677	45.4016	20.6747	16.3351	6.2335	68.4646	12.0598	56.9271	8.1467	69.8251	67.3263	7.2957	1.6941	14.3872	18.1864	5.4627	19.3373	11.3581	1.8736	18.5062	66.5835	16.8252	24.6815
TK1	494.299	48.0799	166.272	141.391	152.673	37.0366	149.286	167.319	164.387	178.459	42.3082	172.557	115.052	144.244	238.306	77.5791	71.0245	225.684	42.0884	197.787	74.3408	289.654	41.126	78.0545	29.5769	324.596	35.923	114.882	198.458	106.655	31.7974	54.1632	145.415	69.1162	71.3724	44.5851	262.05	54.7767	19.5471	23.3089	123.67	56.1283	55.1927	20.0749	32.6131	180.923	156.852	81.2144	5.7422
TNFAIP3	14.4724	40.5224	27.619	19.4059	29.6723	22.7997	18.8427	33.3366	28.4868	2.5891	21.8368	5.9814	31.3592	106.697	12.5084	12.8481	76.6032	5.6313	11.83	4.1973	4.6105	6.2908	53.4875	8.0705	15.0413	9.8357	8.2326	115.84	25.2484	7.1783	36.2941	21.6767	62.142	14.6098	14.7073	27.4912	13.7348	8.0564	4.6603	7.9013	9.8474	25.0939	11.2051	8.3998	8.696	10.0505	26.5339	4.0836	14.3725
TUBB6	88.9308	77.7549	62.6972	33.0013	80.8635	56.5354	50.3478	36.1568	94.6935	38.5002	35.2301	36.4317	101.534	34.9464	59.5515	42.3112	69.5004	27.8698	56.5437	49.8822	43.7148	49.8266	21.5351	69.7299	40.6305	75.4288	35.1419	50.3049	57.2745	124.183	21.6038	40.0322	50.5152	29.707	50.6585	28.9189	75.1985	131.247	10.2409	27.5915	38.3654	104.536	20.6267	27.9402	5.7506	105.63	37.5783	50.6704	44.2066
VGLL3	0.2852	2.9559	0.391	0.4937	0.1508	1.3625	0.4361	0.115	0.1428	0.096	0.7885	0.0318	0.4566	2.6241	0.2349	0.3571	0.5169	0.255	1.4329	0	0.0774	1.5074	4.2858	0.1336	0.5242	0.1936	1.2138	0.6996	0.391	1.2657	0.0934	1.8471	0.2574	0.4719	0.0952	1.3597	0.1043	0.1705	0.2274	0.0629	0.4531	0.1765	0.0915	0.3644	0.0183	0.2532	0.1688	0.0608	0.3044
WWC2	3.8784	9.0767	0.9138	7.3612	2.5468	3.6385	3.8498	1.1757	1.1332	2.5181	1.6376	0.5721	3.157	8.1639	3.5382	5.0542	0.4558	5.6583	11.9577	0.5968	3.5402	3.3143	7.7096	0.8903	11.7179	0.4215	7.5868	6.4623	11.7427	2.1793	1.0112	2.2011	1.446	1.9611	4.825	2.9502	0.7003	0.2657	1.0395	13.9078	0.5497	0.2591	0.6409	22.7302	1.2097	1.7968	0.9414	0.3956	16.4768
ZNF367	8.9166	7.2646	2.7887	9.5934	7.3704	2.5036	7.2093	1.7289	4.6681	3.0612	1.18	2.6651	26.9016	13.765	6.7092	11.0274	14.3813	16.6288	19.5606	2.9142	1.4149	8.1699	6.759	2.2922	5.0145	1.8003	5.675	6.6629	16.0823	1.8465	2.2232	3.3472	10.4497	5.5272	3.5847	7.9368	1.5558	0.3868	2.4685	7.226	7.0833	0.7559	2.1929	6.2249	6.9419	4.4243	2.7903	0.8077	9.5405
C10orf90	22.2839	8.5997	16.5077	19.2977	52.5751	3.615	5.4335	0.0293	34.3485	22.7245	8.0392	48.5732	7.1885	0.1265	9.662	14.9451	21.5139	6.4292	14.1298	1.25	1.1006	2.6958	5.3866	7.8183	9.4209	16.5577	11.6279	11.1681	5.9772	14.0362	4.0307	6.6477	20.2101	3.1724	8.0209	3.3726	19.9825	2.731	4.0625	21.4164	5.4351	3.1439	17.6717	12.7223	6.32	19.6853	15.1535	8.2163	10.8242
PELI2	12.5686	12.4664	3.2662	8.0911	1.9619	2.3564	4.8046	2.4428	6.3909	7.7429	3.4247	5.2336	4.6971	4.7753	5.2904	7.1754	1.8673	13.5708	3.1376	2.6147	10.8027	10.7123	7.7047	1.4362	16.7593	1.5237	4.3814	6.7455	2.6834	3.6464	1.9439	7.7852	4.9076	2.7025	5.1008	4.125	1.1806	0.4623	4.4903	6.2797	3.1808	0.7052	3.3385	19.6248	2.297	3.5298	5.2348	0.7126	8.256
NFE2	0.769	0.1496	1.7018	1.4163	0.3485	0.6914	1.7228	0.4859	1.2139	0.6823	1.7871	1.2475	0.5115	0.6461	0.5961	2.4144	0.8218	0.0887	0.2402	0	1.5472	1.2181	1.0447	0.6001	0.4481	0.8351	0.2361	0.6973	0.0508	1.1373	0.1399	2.5892	0.1735	0.4096	0.1283	0.2278	0.3833	7.5031	0.101	0.2794	0.1629	2.9382	0.524	0.3572	0.0197	0.468	0.7871	0.0863	0.7326
MGP	3.4982	35.7481	51.0958	10.4729	4.2595	55.6004	1504.74	5.7051	1.963	33.4518	34.3958	140.588	4.3697	17.6705	3.6896	956.753	23.3675	178.098	134.16	139.357	562.241	337.096	718.768	1517.87	21.6947	4.1013	65.062	9.2356	6.1117	268.544	13.5892	212.123	9.5121	473.184	29.274	118.566	12.11	5.4564	6.4349	4.9	35.8034	8.976	534.128	170.071	0.6125	5.1395	838.177	26.5939	57.9473
BMF	2.7152	11.2871	12.92	24.3325	22.3442	5.9463	11.1665	8.7152	17.096	9.4009	24.2915	23.9289	15.2969	32.514	11.4181	15.5782	31.5287	29.8039	72.3311	5.3332	3.7556	7.8077	35.4566	7.591	22.8775	4.1252	48.6346	21.6289	16.2737	26.7189	1.8021	11.3571	1.2147	9.3625	23.6075	5.8844	11.8947	3.1657	8.3294	28.7411	5.2488	1.4631	8.5718	13.4155	1.4695	5.0251	11.7056	17.1134	44.633
NCALD	23.4741	3.9182	6.2669	2.6257	3.4606	9.0901	11.8378	0.9353	9.5164	3.3319	2.9354	5.0952	2.8646	6.2904	5.3467	22.2406	11.0751	0.3518	0.6585	4.7993	0.1685	10.9455	6.4525	1.2271	1.9544	7.2826	3.0276	9.3027	2.3281	8.9473	1.0684	3.8035	14.8221	0.7411	0.7613	3.3341	11.081	1.072	2.2928	1.5361	6.4873	4.0122	3.3327	7.3799	2.2565	0.5729	3.9312	2.4194	3.5298
GAS7	90.4078	73.6302	79.1957	393.592	60.1944	41.3309	90.0339	111.111	117.185	114.175	27.9034	247.927	115.61	22.4259	65.4084	189.82	108.156	34.357	137.099	136.606	139.203	175.544	160.689	36.7911	89.5852	36.8318	16.3922	116.15	57.4928	158.26	4.2071	48.5192	28.0372	60.6514	163.397	38.3848	67.4682	27.869	25.4933	3.2588	20.4001	47.2234	32.4977	75.0383	3.8391	110.949	114.282	41.6827	9.298
TRIB2	361.603	202.325	107.433	564.107	221.363	107.586	248.254	116.897	130.793	144.984	90.3397	249.509	271.508	66.1297	116.563	342.4	419.682	493.639	447.983	161.243	236.716	313.975	118.074	80.4308	207.416	45.6124	45.466	118.483	357.033	111.084	64.2154	59.0287	449.881	134.196	479.202	111.981	154.536	26.1393	49.9719	64.6369	105.037	42.9684	60.6155	185.63	116.939	81.815	197.867	224.862	364.528
HTR7	0.1826	0.1018	0.0658	0.2493	0.4585	0.1647	0.3862	0	0.0605	0	0.5528	0.1498	0.087	0.4701	0.0761	0.4784	0.608	0.0604	0.109	0	0.0237	0.1143	1.5405	0	0.1173	0.0775	0.1492	0.6903	0.3457	0.5676	0	0.241	0.0337	0.1174	0.0524	0.0705	0.1913	1.5123	0.0491	0.0543	0.0317	0.1972	0.0839	0.5471	0	0	0.2009	0.0117	0.1396
GLT8D2	2.4804	10.7694	2.7243	1.1466	1.8462	5.0696	1.5667	1.0531	0.5133	0.323	3.4231	0.2651	3.8337	3.042	1.7224	2.2961	1.4713	0.2563	3.3398	1.9465	0.4019	7.1456	4.7077	0.3641	0.4482	3.7432	3.6553	2.6103	0.4587	8.6358	1.263	11.8302	0.179	3.8471	0.9638	3.1267	1.8829	1.0008	0.6461	0.6631	1.7985	1.5994	0.4899	2.1937	0.0711	0.169	1.0839	1.085	0.9314
MAN1C1	3.9139	1.8363	6.4603	15.9947	3.2905	2.9414	2.8122	0.7238	0.8992	3.2401	6.5854	9.6249	2.4104	12.6455	6.6906	4.2805	7.6426	2.1945	1.0112	5.7757	11.4641	18.5778	20.1861	3.1483	2.1205	2.7478	2.2078	9.2272	12.2545	11.5457	0.3039	5.1505	3.3603	7.874	5.0982	6.6793	3.365	0.7182	0.4343	0.6687	2.3513	3.1743	0.9523	2.0927	0.5929	18.3278	15.1971	1.9525	1.2275
DDIT4	72.725	32.493	58.8247	141.556	52.7866	25.2941	35.7215	13.3004	107.603	32.2116	32.77	30.026	29.7532	47.1873	55.5662	62.1612	83.7344	37.7581	30.3689	36.0361	18.439	85.1406	24.2365	32.5018	119.871	35.7882	5.4135	167.004	28.0794	34.7156	4.0067	11.1255	18.3014	25.9446	42.0611	26.9213	53.7681	91.8256	9.4097	21.9243	12.6344	12.8066	91.529	18.8286	2.6508	76.9943	66.64	3.9127	15.0692
FBXO32	69.1762	145.226	59.664	40.3322	109.974	26.4563	32.6734	22.7705	34.7407	25.465	16.5083	44.3101	128.232	21.7564	45.6348	47.0019	52.932	86.4227	73.1407	28.4133	17.3143	8.0259	69.9648	43.8108	56.2033	34.6366	37.7149	81.6318	92.6975	42.8984	31.5631	17.049	113.994	37.9258	41.4429	18.1248	23.0915	9.0466	17.9033	33.9423	33.5537	18.493	90.4125	70.077	13.4417	398.799	34.7556	14.4921	26.0028
MSC	11.6591	37.3171	13.4088	4.9427	6.5992	15.2707	8.9077	13.9595	6.0262	369.695	27.1009	29.3244	282.861	25.9123	7.1034	15.3456	101.735	20.4351	3.6034	105.09	41.7388	84.4308	147.061	35.3792	2.544	23.0936	11.7319	15.7733	8.4641	45.3907	41.3886	69.74	24.441	5.5455	387.376	84.7386	20.4323	39.9139	1.8552	2.5887	12.9842	276.007	4.8261	78.1054	0.6827	24.6865	175.303	66.7048	12.9116
HTRA1	182.455	191.077	213.502	19.0029	32.6216	57.5815	39.2722	63.9113	17.0401	9.5383	113.206	299.922	406.447	50.7983	15.6109	52.6059	76.14	10.8531	44.244	129.819	163.051	199.272	71.7829	16.1083	7.4931	336.753	53.9009	33.6536	17.6046	220.221	29.4231	89.7806	37.0836	39.3761	28.5351	29.2087	46.6421	79.2888	10.8019	11.2332	112.235	107.979	36.0316	27.8813	1.9235	15.0733	67.1122	57.8747	24.8663
COLEC12	1.0474	15.1443	3.0992	3.9447	2.9232	4.1328	1.174	0.426	0.3621	1.06	4.0953	0.37	1.5431	5.8218	2.3617	3.9044	2.4492	1.256	4.5276	2.9807	0.6265	10.3873	7.5319	2.3945	5.8786	4.5076	2.92	1.5606	5.852	9.7595	0.3916	10.8246	0.1754	4.4265	0.8339	7.5172	1.6446	0.7592	0.2832	0.3789	1.7371	1.1253	0.982	0.7976	0.0887	0.364	4.2426	1.4	0.9241
EYA1	0.0363	0.0427	0.0539	87.5296	0.0353	0.092	9.9978	0	0.03	0.2028	0.0069	1.0355	0	0.0621	0.0236	0	0.0181	21.0575	9.5223	0	13.6823	23.5828	25.207	0.7484	24.1056	0.0144	0.0086	2.2818	0	0.032	0.0071	9.8729	0.2889	2.8474	0.026	2.8819	0.0518	0.0035	0.0146	0.0304	0.0531	0.0315	0.0703	0.017	0.005	0.0297	1.3904	0.0438	0.0223
KCNS3	8.1865	2.1054	23.6234	57.4244	17.6032	24.0914	26.2585	0.5569	11.6308	25.8798	2.8432	9.5719	5.3855	4.4602	52.8809	77.9885	1.1067	1.4742	3.9914	1.0178	15.2203	6.7108	20.0486	18.4229	1.4061	5.5059	11.4926	15.2523	14.601	18.3666	0.9087	4.2797	12.7289	1.4333	3.2756	10.7632	13.0108	0.7461	0.0763	23.8184	8.0855	4.7674	11.6433	34.5443	0.1636	24.631	9.0491	12.7941	57.4009
CA11	25.9707	24.5525	27.123	24.1657	15.1774	6.2127	24.6848	12.8991	3.4515	9.057	73.5502	13.6631	33.8889	9.9829	6.9439	44.4582	55.2764	37.5378	20.7296	64.2114	13.573	8.7724	19.6921	7.3158	19.6711	41.992	5.4682	17.0884	32.5984	7.0891	5.7237	12.2267	1.9558	58.0153	9.0972	15.1633	18.5243	15.3569	2.645	6.494	12.8553	3.8442	8.6091	13.475	2.6783	2.7942	16.1883	5.1151	12.1337
HLA-DMB	3.0137	6.6399	15.6917	29.5698	31.9772	23.2777	32.7558	1.8367	1.4712	5.484	96.3274	2.7942	11.6596	104.209	19.446	32.9695	46.7101	11.4505	8.9191	5.7799	0.4452	5.3573	124.39	12.1234	11.5823	17.9283	13.4778	92.8862	53.0032	13.5416	2.3214	37.1705	0.6981	30.8684	6.729	86.5722	30.9963	12.0151	0.6577	4.927	13.9926	1.8972	2.7159	11.6434	0.5952	2.5372	68.3283	7.4197	8.6311
SH3PXD2A	63.7767	22.3702	19.3583	71.3901	92.8774	10.7183	17.2082	14.0103	42.4985	19.6743	18.5046	34.6726	28.7104	19.0596	15.5418	30.936	14.8742	4.2168	5.7405	12.0508	7.523	20.5195	19.943	5.0949	23.7704	25.8585	23.3207	28.2041	23.6366	33.5685	14.8782	19.007	31.0546	8.65	12.6453	17.6866	39.9451	9.6058	7.9709	12.6991	11.7155	33.6924	21.6984	16.8525	3.2618	56.4044	16.8988	6.8397	22.5473
CFI	0.182	0.6437	0.5249	1.2783	0.2365	2.0527	7.5253	0.0731	0.0431	0.6159	0.7875	0.0593	0.2014	0.8747	0.7494	3.8812	0.5542	0.7309	0.1552	0.4082	1.5336	1.4862	1.0368	0.2909	16.941	0.184	0.1717	2.5657	1.4404	0.6983	0.3322	2.6173	0.2763	8.883	0.1368	1.1945	0.1362	0.0997	0.3496	0.2515	0.6541	0.0301	2.4803	0.4762	0.2673	0.1323	0.3458	1.5398	1.6903
GRIK2	0.048	3.0432	0.0173	0.6549	0.0831	1.7049	3.527	0.1148	2.3027	0.8904	0.0161	0.0073	0.3429	1.7527	0.6439	0.1002	0.6388	0	1.9501	0	0.0259	2.3029	0.1186	0.0429	0.0411	0.0905	0.191	0.0283	0.0454	1.2577	0	0.0659	0.0369	0	0.2446	0.5739	0.5559	0.045	0.2794	0	0.208	0.0185	4.3263	0.02	0.1761	0	0.0293	0.1235	0.0349
ARHGEF3	6.715	11.2917	5.344	21.129	12.706	5.7763	14.7335	0.855	2.4045	2.7563	5.3903	5.6078	3.9517	35.8824	10.8165	13.5736	15.2534	5.084	5.4224	2.5416	4.6537	6.3012	32.417	7.9352	6.007	1.4459	6.7939	18.1433	17.5502	9.8081	1.0706	11.3237	4.4075	8.6538	3.1254	16.3488	2.5068	1.7301	0.933	6.2815	2.2491	1.3086	5.051	13.5433	1.0332	34.63	11.6846	0.9181	4.8016
KLF9	10.1987	14.2803	6.8702	22.5564	4.2858	11.2391	13.9931	5.3326	1.1897	3.2339	4.9331	2.6583	11.7947	21.7708	3.7934	19.2299	3.1815	5.9338	17.1347	5.6136	8.0171	11.6607	19.6141	3.0798	53.1648	1.2653	5.8838	36.428	11.9103	9.9245	1.7564	7.2957	3.417	18.5869	1.441	8.482	2.427	1.4781	14.4385	10.7521	1.923	2.2392	4.1241	2.8343	0.4047	2.0658	5.2563	1.7028	49.0663
PCSK1	0.5443	0.198	0.1706	0.4632	0.164	0.3507	19.0875	0.0517	0.0784	0.2802	0.3941	0.5071	0.1692	0.2948	0.2136	0.9437	0.0473	0.0587	0.0618	0.2229	0.1227	0.2964	0.9655	0.1588	3.4969	0.6698	0.3348	0.4055	2.5879	3.8795	0.2283	5.6812	0.7979	0.6372	0.0113	1.1875	0.0789	0.0424	0.0064	0.176	0.2258	0.2099	0.1904	0.1477	0.0261	0.0172	0.4557	0.0762	10.1856
SULF2	18.4654	41.3441	33.9527	20.8892	11.9164	25.4809	10.7196	6.5185	5.9801	6.1136	37.6667	7.8144	14.3775	32.8993	7.1409	11.8463	27.1424	22.828	19.7209	27.9167	32.1119	25.0026	24.4032	5.1122	5.3955	23.7825	19.1998	27.6658	10.548	80.3804	7.9339	43.1334	26.5718	18.1455	11.3203	17.0982	15.8644	15.0889	3.2106	5.2701	16.0145	48.9083	4.6941	8.1872	2.6844	116.511	94.496	18.6419	4.8368
DEPTOR	21.0398	20.4759	5.9145	2.8554	8.1083	6.8877	12.069	4.8831	1.6779	1.6297	12.6893	2.6843	3.0481	22.1649	4.5071	17.3463	21.2449	7.5003	18.2002	2.4237	9.1788	5.176	9.7323	14.7034	31.5928	0.8195	13.3657	6.7284	9.1383	8.4113	0.8052	11.6847	1.1367	2.7927	6.0235	3.9118	5.5165	2.3319	4.7881	10.3392	2.1557	0.7259	6.0446	29.1622	1.9132	3.0521	2.9426	1.9411	9.2782
FRAT2	35.0277	14.0138	10.3348	12.2482	18.2666	5.1947	27.7535	6.915	11.9374	12.6486	20.8881	11.2858	14.8512	23.2466	7.5298	11.9984	27.2621	13.3763	13.046	8.9106	10.7799	17.3566	12.634	7.3662	15.7204	15.586	16.9912	16.6027	10.025	14.0943	2.2498	9.0394	12.9011	9.1946	16.6704	14.7922	9.3562	11.4671	4.3201	12.3746	12.7789	10.8823	7.9919	24.4549	2.0215	15.7245	10.0472	15.4375	14.0163
FOXO4	16.6573	27.674	29.2878	28.0893	29.8101	8.0395	21.4318	10.4362	17.5556	18.7775	47.5057	32.9572	17.9586	20.5864	21.0788	17.5492	67.6802	14.1029	51.4344	9.4499	18.9023	15.935	29.6662	22.8374	32.149	17.6796	27.8666	30.9863	28.0759	29.0722	2.4505	15.812	17.226	14.7328	66.2099	9.0252	21.0781	7.1411	6.7275	34.2025	7.3695	14.939	30.5391	33.188	5.0465	16.1462	25.166	16.4688	55.6693
CHI3L2	0.6027	1.7036	11.2754	3.6599	2.9823	4.7972	75.088	0.5047	0.5945	0.5231	1.7088	0.5613	3.0033	48.7162	1.5629	7.3422	17.886	0.2863	0.7607	0.8454	0.0499	9.1268	21.9935	5.9904	0.7663	0.3675	2.4675	23.5942	9.9449	19.8101	0.341	5.5546	0.0711	1.809	2.2264	6.3118	3.0237	6.8564	0.5173	0.7155	0.7676	4.4516	1.658	4.8358	0.1695	28.0815	11.4305	2.4514	0.2942
GNG7	21.9928	23.2371	25.332	129.428	33.3784	12.0664	63.8432	14.8755	41.2611	19.8987	69.9782	73.0839	34.6135	35.4144	39.0875	195.713	146.653	98.0954	40.4154	98.3926	47.8638	63.0302	68.3544	16.4569	89.1329	27.4269	32.1308	25.2731	88.0563	19.3243	5.0384	40.479	25.6959	39.4371	221.81	22.2284	44.2442	9.8108	18.1009	31.9376	44.9912	35.9227	21.9995	187.264	35.9001	26.9019	30.7745	25.2614	137.315
TRIM2	5.8731	17.9218	3.4577	53.6022	7.647	17.0985	16.0087	0.347	3.191	5.4079	1.5361	3.5316	4.0188	5.6796	12.1972	30.9405	7.535	14.1912	62.1538	2.1858	13.5354	24.7498	20.3205	3.084	28.1794	1.2788	5.5737	23.8469	24.3166	3.6894	0.8159	4.6151	3.1475	11.5269	2.275	10.5341	0.7528	0.6601	1.7945	9.9413	2.9997	0.5401	26.3075	42.4355	1.5337	7.1155	4.4839	1.629	20.6583
UST	6.172	14.339	3.0741	7.312	4.6642	5.428	6.5224	3.201	3.224	1.7271	1.2504	1.1891	5.5324	10.7113	4.9259	6.9231	4.1687	6.274	6.4794	4.4207	3.8957	2.2153	5.1749	3.1038	4.6244	1.3747	3.7961	3.5129	7.3461	3.7471	0.3604	5.5509	3.0836	2.2638	8.8802	2.2248	0.9937	1.567	1.0238	2.3087	1.8889	2.072	1.6034	8.2382	0.919	2.9766	8.4535	3.2814	5.5555
DDR1	14.6476	46.6217	52.9922	30.7292	72.4351	14.6148	62.8825	51.9236	101.824	50.54	157.193	115.766	63.2191	7.6644	15.9764	74.5442	126.65	151.002	70.9065	33.8094	26.1453	14.275	34.9346	15.7188	186.742	70.1412	34.5897	75.7588	96.5434	93.8619	5.9603	56.1162	51.9095	32.9181	30.7455	32.3479	39.432	32.5229	33.0933	43.1534	14.3872	37.7931	36.3482	93.6767	12.713	125.884	75.7976	24.1721	170.135
BFSP1	5.9794	5.2053	12.5395	15.1656	0.9934	0.5937	9.1211	0.7752	16.666	4.7995	0.7212	5.0411	1.8824	0.5778	0.8748	34.8765	7.3137	7.7414	7.6037	3.6596	10.8087	4.0925	31.4532	3.382	10.5584	0.785	2.9084	6.1322	3.2936	9.3894	0.5196	9.99	0.66	2.4332	2.0862	2.3517	1.021	1.2596	4.0043	2.2801	0.3914	1.3924	5.6397	1.0486	0.4832	1.1756	5.8623	1.3191	1.9103
BCHE	32.2564	45.5083	15.3963	0.3193	0.1787	8.6289	78.1067	18.1466	26.3048	56.5762	7.4771	8.862	42.0003	1.5767	10.3449	57.5712	48.8954	63.3192	2.8326	15.0267	18.2122	67.0714	54.8138	4.3758	24.8424	3.1973	16.4763	17.0419	58.4527	7.3289	3.0125	18.9118	8.5199	0.6634	0.4539	2.4213	13.9163	2.0469	23.2242	6.4315	3.8122	1.5598	8.6545	60.6615	11.937	0.42	2.2893	0.3054	33.3147
COL6A1	475.333	822.946	298.737	141.118	158.306	205.306	51.978	297.254	165.616	64.2879	603.418	172.826	440.107	254.729	112.547	103.559	122.938	176.732	160.503	470.553	193.872	423.313	217.567	45.2068	100.831	1804.08	308.637	325.831	96.4363	969.038	73.5583	298.416	92.8404	182.711	196.413	140.3	119.651	179.714	121.985	65.0449	356.44	917.858	93.3441	66.4506	31.6316	127.941	132.836	170.608	127.862
PCDH7	6.4994	15.0433	2.384	63.8485	1.6583	1.0737	53.187	3.701	12.8401	8.016	4.5392	5.4266	1.4123	0.9928	16.925	23.1407	25.27	21.2278	44.9134	9.1617	15.7148	51.5576	55.2571	9.0897	88.0164	0.6847	20.0525	8.6582	36.1054	5.6702	0.0405	11.7529	0.4207	42.8735	9.5972	4.6102	6.9014	3.8793	6.9238	29.9311	1.782	1.1775	12.369	73.3547	2.3441	1.6853	9.4237	4.3896	61.002
TGFB3	3.0501	12.9051	8.4869	9.6334	6.9266	5.9824	6.2537	3.3657	1.219	3.7577	5.3533	2.9105	3.2976	13.9	8.6211	6.2911	5.5933	4.5951	3.2053	10.2096	8.3603	23.0786	10.7916	4.9954	6.0972	4.3021	10.7209	8.0446	2.5164	12.1201	4.436	9.4013	2.4663	7.1304	3.7377	8.8444	4.4047	2.4389	0.9137	2.0765	7.1055	4.6619	1.8409	2.778	0.2762	2.5938	5.1746	4.0459	3.447
AKR1C2	0.7063	0.5473	0.6366	0.0357	0.102	2.6361	0.1927	0.098	0.9313	1.0154	0.0495	0.1342	0.0585	1.1082	0.0681	0.1006	0.3267	0.0973	0.8418	0.308	1.7675	0.1152	0.2183	0.0615	0.4538	0.3887	0.1419	0.9969	1.4955	2.9024	0.087	0.0324	0.0725	0.0158	0.1689	0.0379	0.1869	4.9816	0.0897	0.0219	2.4763	4.76	0.7666	0.6206	0.0576	0.1569	0.009	0.1642	0.3215
LAMA4	13.3227	44.6822	42.9981	85.7209	12.1268	22.1827	51.0064	8.313	19.4484	29.2772	15.7193	22.3235	21.976	23.0481	12.4448	71.9455	61.005	36.9696	34.7022	23.2465	68.2961	44.3367	55.748	6.2764	13.4918	13.2308	7.8226	14.2131	7.5226	30.5254	7.9464	33.794	6.665	21.4152	18.1178	15.1709	12.4161	2.6724	4.5969	5.1668	7.6119	8.6828	21.3907	20.1129	3.4253	5.8066	28.1712	9.2907	22.5016
SLC6A10P	8.2928	0.0296	0.102	0.0129	0	0.0182	0.2352	0.0088	0.0312	0	0.0143	0.0774	0.0337	0.0235	0	0.0161	0	0	0	0	0	0.0332	0.0131	0	4.5642	0	0.0267	0.0334	0	0	0	0.1518	0.0261	0.0114	0	0.579	0.0135	0	0	0.0211	0	0	0.0813	0.0236	0	9.3827	0.026	0.0546	0.0309
HBP1	14.4208	18.3861	14.8245	28.7596	30.2701	5.4661	22.1497	4.2626	13.5869	21.6997	10.8621	9.6487	16.6825	24.6636	10.5738	27.9009	31.2499	25.6559	46.2481	2.1955	7.6535	15.3788	32.6482	9.334	29.3229	2.5239	23.8725	31.3329	39.7424	16.568	1.4067	5.1271	7.2638	15.6598	11.9553	8.5621	5.4824	1.7933	6.609	30.7723	1.8807	3.0828	7.7043	33.8073	1.5404	4.8956	11.2324	3.0545	29.503
CTSF	151.066	171.99	136.664	28.8981	232.81	120.284	94.2756	78.9803	84.7997	159.6	145.387	257.036	137.536	43.8	17.3929	33.1425	228.917	106.827	159.171	127.935	86.8347	26.8039	48.9393	94.9906	140.275	136.217	516.025	63.968	166.318	197.559	7.1486	45.6837	89.0354	46.6901	297.742	23.4943	49.0706	17.0569	56.9432	796.098	113.999	40.2863	38.623	233.582	36.2848	145.387	40.1755	275.254	471.802
PCDH18	0.6763	4.8258	1.3601	2.054	1.4123	2.9201	2.8438	0.5626	0.1988	0.948	0.8517	0.1643	0.6553	2.4882	0.9282	10.3907	0.8587	4.1382	1.5986	0.5952	1.2411	10.2575	5.1249	0.2969	4.0565	0.9391	5.4304	1.1202	0.754	5.1806	0.3559	3.6369	0.4291	1.7831	0.5531	1.4711	0.4245	0.2327	0.2345	1.4952	1.398	1.1042	0.3813	13.3442	0.2506	0.1516	1.0171	0.2624	3.107
IGFBP5	68.2798	105.836	76.5688	1268.25	22.652	87.8413	615.498	11.2238	2.9864	25.8819	55.0966	8.09	18.5758	79.7762	17.2292	926.509	128.073	18.9477	19.0381	351.173	120.991	374.468	106.004	20.7895	27.9761	6.4923	151.46	33.6606	65.399	154.611	14.982	107.197	8.2405	148.089	37.6739	15.8323	52.0246	48.0627	7.312	5.8633	110.847	10.8283	6.0606	57.5101	9.6368	17.9588	43.5514	28.6689	18.0339
ZCCHC24	39.243	30.3037	46.1236	154.746	49.3082	20.05	26.0432	8.5256	48.3981	17.6775	28.6704	41.656	59.1403	15.9672	39.5427	60.543	54.711	18.7684	31.965	17.3432	11.2297	29.7279	51.4391	9.5731	83.98	8.5115	18.3166	48.7244	43.9417	53.9706	2.1279	14.7513	8.7922	13.4936	20.9456	9.1414	15.6219	3.7241	5.1928	5.8943	7.2321	6.4798	13.0299	107.069	2.0281	35.5093	24.9623	13.4071	44.663
YPEL2	3.3704	4.394	3.9548	18.8933	4.0506	2.5537	4.497	1.3242	2.3238	1.3611	1.2501	2.7103	2.8998	10.746	3.7283	11.3044	3.7942	4.5771	9.566	1.5093	2.2755	4.5285	8.322	2.7118	6.1499	0.7474	5.6706	7.6093	5.387	5.0928	0.5926	4.4534	1.642	2.8925	2.8429	2.8345	0.9438	0.5625	2.6522	7.5872	0.9099	0.399	3.6248	22.7029	0.2086	2.362	3.0661	1.1112	7.3772
MEF2C	4.7199	3.1283	4.875	6.9997	3.9697	5.3266	9.6316	0.5221	2.2736	3.6987	2.7596	1.1654	7.069	43.4565	4.3847	17.8898	9.8835	16.6367	12.7573	1.151	0.615	19.7698	25.2247	1.3076	12.0213	1.2057	18.0404	15.419	30.9038	3.8459	1.2287	5.7164	2.2266	8.6377	3.4917	4.3044	2.6865	0.9237	3.3986	18.1397	3.2881	0.3702	4.666	25.7858	3.1908	0.4861	3.4068	0.8815	24.9291
MAF	28.4246	8.0138	16.4733	101.964	36.9987	16.0775	37.9024	2.1609	14.8045	6.4107	27.0502	11.0085	9.0663	37.881	6.9618	57.0903	33.38	5.1511	24.1898	5.6289	11.0339	12.9185	45.1702	14.8869	17.7463	12.4444	34.3822	25.6825	27.1481	25.6748	2.092	16.1159	5.8059	3.9962	19.8712	13.2912	10.9739	16.7366	2.0407	12.9424	10.2594	17.9046	17.8068	9.1893	2.8989	11.5875	29.082	3.1708	5.3227
CHST1	1.5215	3.6375	5.4356	1.1995	1.6825	3.8603	1.9605	0.7297	1.1546	1.0724	6.3215	3.1465	0.5666	5.7769	2.8017	1.5168	2.8591	0.9658	0.5372	7.1641	0.537	5.3177	2.5444	0.7537	0.5586	4.5753	1.6656	3.7721	0.6817	3.4813	1.2467	3.6423	0.5647	2.1619	1.2344	1.657	1.8117	1.0837	0.2338	0.8489	1.2608	2.4101	1.5767	1.0403	0.4388	2.5282	1.6567	2.5617	0.46
[truncated: 48 more columns]

## Sheet: Tab 3-CTGF High vs. Low
gene	ef86558c-8a25-4bde-b139-ecf98e04ef0e.rna_seq.augmented_star_gene_counts.csv	877f3bcc-97ea-4b0e-9f61-98a9eaedd952.rna_seq.augmented_star_gene_counts.csv	c0054cf0-8f4b-47b6-a8fc-63a1fd36bcc7.rna_seq.augmented_star_gene_counts.csv	22e9b9d1-ac71-43f5-8606-f9f53c6ecc08.rna_seq.augmented_star_gene_counts.csv	f20785b9-991d-4b87-8ba7-ca32373f1996.rna_seq.augmented_star_gene_counts.csv	dc3154b7-6ae4-446a-8a80-91a86c57cefe.rna_seq.augmented_star_gene_counts.csv	1268327c-805e-4f52-b9ab-451f17e3d129.rna_seq.augmented_star_gene_counts.csv	e7c14078-b85e-40b8-9f56-9474543905eb.rna_seq.augmented_star_gene_counts.csv	20679021-a108-4728-ab9a-fa3ca2fed0d0.rna_seq.augmented_star_gene_counts.csv	ae8e545c-f6ab-40e2-8122-162eab4b2724.rna_seq.augmented_star_gene_counts.csv	2c343b93-910c-4921-bc2b-f7fbfa4f1596.rna_seq.augmented_star_gene_counts.csv	b652254e-228b-40d4-be79-536ad87dad69.rna_seq.augmented_star_gene_counts.csv	b4fd9abd-cb2a-4d1b-abb2-8e2796d009cc.rna_seq.augmented_star_gene_counts.csv	a7bda5b9-9c95-4f90-bab6-10ab15ee2b48.rna_seq.augmented_star_gene_counts.csv	b09c5d28-8a02-4343-b678-07cbf351ed44.rna_seq.augmented_star_gene_counts.csv	b1f01324-d0ca-4779-9ae0-5348e2613084.rna_seq.augmented_star_gene_counts.csv	04e3aeba-c9bd-483d-9484-5ecc0e64a054.rna_seq.augmented_star_gene_counts.csv	9cde93c5-569a-482a-901b-2bbc21aadfa2.rna_seq.augmented_star_gene_counts.csv	f8676f25-4b49-44b3-b953-c457c3be5a3b.rna_seq.augmented_star_gene_counts.csv	85d43afd-9aac-48ca-a9c4-00357b7207e1.rna_seq.augmented_star_gene_counts.csv	4e64826b-fffb-4430-bc34-ea6086e89a0a.rna_seq.augmented_star_gene_counts.csv	20a06f04-b457-408f-8c3c-f0032badf064.rna_seq.augmented_star_gene_counts.csv	b2b4cc41-5760-4463-bcde-16115ceb12c2.rna_seq.augmented_star_gene_counts.csv	3bb03dc9-6daf-42ef-95d6-cdf726f926e8.rna_seq.augmented_star_gene_counts.csv	aeac6db7-09bd-45f9-a5fd-c8358f86bff8.rna_seq.augmented_star_gene_counts.csv	3af1ff76-660f-4dff-822d-cbc90999d3ff.rna_seq.augmented_star_gene_counts.csv	a17b6971-a249-484a-805e-d20ef3c4cd15.rna_seq.augmented_star_gene_counts.csv	ccfdc2a2-bb01-41c2-9ef1-98bbd1cfae22.rna_seq.augmented_star_gene_counts.csv	7688db2f-f816-443c-98d8-f8077ba0e74f.rna_seq.augmented_star_gene_counts.csv	530f723a-ac5b-4e14-93b9-1d501b92fddd.rna_seq.augmented_star_gene_counts.csv	236350e9-8964-42ae-8880-d2f2281ff993.rna_seq.augmented_star_gene_counts.csv	b02373ab-6860-4066-aebe-2c8a4cdffeda.rna_seq.augmented_star_gene_counts.csv	fea785bb-de96-4411-8bf4-a7d254af9ff9.rna_seq.augmented_star_gene_counts.csv	beb52b13-584a-4227-abe8-9861c3388c14.rna_seq.augmented_star_gene_counts.csv	cc1c7e4b-89a0-4d94-b9e5-293c2eacadd9.rna_seq.augmented_star_gene_counts.csv	aad89bba-d9dc-4a93-8e77-26f2c1ba1c3f.rna_seq.augmented_star_gene_counts.csv	6ca5eb09-d104-4305-b3ec-4d6e8a0c2850.rna_seq.augmented_star_gene_counts.csv	52425995-0bd7-4149-bc2a-26522ebd143d.rna_seq.augmented_star_gene_counts.csv	f81935a9-10ff-4ea7-8f22-b78b842a00f1.rna_seq.augmented_star_gene_counts.csv	8ad884fa-e426-4bc0-960d-08db42d341da.rna_seq.augmented_star_gene_counts.csv	486430aa-f745-4353-9e03-6226ac8d9993.rna_seq.augmented_star_gene_counts.csv	4e24bc58-d246-4c96-952a-a18f95d142b2.rna_seq.augmented_star_gene_counts.csv	bc467b80-495a-43d8-837a-4385aa178307.rna_seq.augmented_star_gene_counts.csv	399e5b76-1d8d-4db9-a186-ffdc2f6e0884.rna_seq.augmented_star_gene_counts.csv	264656b8-d45c-4f5c-a431-366c566296fe.rna_seq.augmented_star_gene_counts.csv	c7d31245-5d71-4a23-8a33-4f83c4718e20.rna_seq.augmented_star_gene_counts.csv	e0b0b87d-1125-4834-8133-5d719f1fd255.rna_seq.augmented_star_gene_counts.csv	08e3d239-3d8a-4eee-9e08-ac2bcb3f2619.rna_seq.augmented_star_gene_counts.csv	28541e4e-2e2b-4772-9566-acf35b31a581.rna_seq.augmented_star_gene_counts.csv
CTGF	29.4504	28.8645	28.3909	27.9903	27.9538	27.6552	25.2986	24.8597	24.5304	24.3999	24.2652	23.7958	23.4193	22.1765	22.1512	21.8807	21.5724	20.7571	20.65	20.648	19.9703	19.3138	19.0703	18.7533	18.4686	17.9461	17.4829	17.4201	17.2758	16.0479	15.3803	15.3559	14.8164	14.6737	14.6007	14.3709	13.1702	11.16	9.5217	9.4147	8.8629	8.5805	7.4128	6.6754	6.5535	5.9339	5.8497	3.8169	3.378
YAP1	37.6743	38.8926	5.1026	7.9196	43.4413	11.7786	59.1794	11.7944	61.7654	59.2061	51.2724	51.7707	22.0593	114.296	37.759	4.6154	52.1391	28.3136	68.554	8.1261	5.9671	9.3324	43.1831	63.0262	13.6839	21.419	40.5674	51.0466	36.9283	27.733	30.0761	30.9706	44.59	47.1781	6.5317	20.6276	91.3351	10.5017	96.7983	4.7709	34.9366	43.233	40.0405	25.59	22.651	4.3912	79.0193	6.9025	55.9334
WWTR1	48.5113	64.0808	9.2084	5.9447	44.5168	3.7584	38.385	13.542	317.518	67.1685	61.8948	9.0027	30.5297	383.408	99.3265	2.3785	31.3782	41.3718	66.894	12.7314	3.4183	16.2233	29.9848	64.8616	11.9986	25.4093	59.9549	24.7066	14.1472	11.1165	33.3157	40.3933	13.7952	47.9999	7.0309	20.7994	4.4823	27.5252	58.2378	3.248	23.5525	50.4355	30.1277	20.2368	9.7223	5.5826	44.3034	7.704	35.4662
ABL2	93.6932	49.378	1.5721	4.1271	16.8501	5.0504	21.3094	8.346	8.4281	54.1016	47.364	27.1219	14.3349	25.3649	51.0334	5.2653	46.7536	22.764	8.903	29.6935	14.774	19.9768	64.8644	24.2079	22.2782	23.5764	20.1149	61.8088	12.7821	21.4456	75.2633	20.868	50.9638	28.2335	18.2231	14.693	7.8294	26.5604	30.2954	8.9843	14.0791	41.0058	5.4646	23.1759	4.5043	5.6271	18.6189	9.7457	38.4574
ADRB2	1.4168	1.3349	1.0249	50.8009	0.6822	1.3383	1.3546	0.236	1.0505	2.8992	1.2755	4.1143	2.6782	1.9444	1.3641	11.8758	2.2402	2.4487	1.2505	1.3555	1.7731	0.4367	0.3268	0.4395	4.9635	2.3357	2.6919	1.0604	1.2039	3.5403	2.6569	0.2392	4.8271	0.1397	4.8285	1.8815	5.3877	0.6152	1.5798	0.0694	0.1806	1.3679	2.1604	2.0975	0.3061	0.3048	3.1459	0.1806	6.3064
ANKRD1	0.0325	0.0567	0	0	0	0.1229	0	0	0.1432	0.0815	0.1025	0.2347	0.0941	0.03	0.2455	0.1367	0.0388	0.0328	0.0361	0.2345	0.9766	0	0.1131	0.0309	0.0246	0.0286	0	0.1431	0.0322	0.1171	0	0.1793	0	0	0	0.0683	0	0.0477	0.1615	0.13	0.0338	0.0275	0	0.1685	0	0	0.2081	0	0.2288
AOX1	1.0005	3.7769	0.0663	0.2277	0.2769	1.0163	0.6965	0.1976	0.154	0.0809	2.8137	0.71	2.4913	0.7334	3.7967	0.2865	0.3334	0.5857	0.513	0.5302	0.4982	0.3335	0.4958	0.5928	1.5703	0.1984	1.892	0.1578	0.9066	1.0848	0.3576	0.356	2.3035	25.8231	0.0108	0.9146	6.6156	0.3868	3.7622	0.0086	0.8288	0.7089	0.204	1.1149	0.4252	0.1449	0.5509	0.2322	0.3244
CYR61	8.8927	22.4172	17.6707	68.1036	12.9807	15.2841	8.2588	9.229	3.7949	5.3854	23.078	26.3887	13.379	8.5255	22.1283	9.6527	5.2717	8.0454	5.8471	9.1381	7.3274	22.8202	6.9659	6.5039	10.1767	19.8731	23.391	6.7421	11.3124	7.5103	15.4168	9.6506	20.6499	32.5919	8.5977	4.8072	5.9039	18.3149	13.8693	1.0948	8.9786	4.0155	4.2127	2.4874	5.6207	6.3695	19.4129	1.9573	8.2895
CRIM1	5.3	4.9935	2.517	1.3197	1.2879	2.8285	4.426	1.2036	11.8641	0.873	5.7013	6.695	6.7977	33.9482	8.3702	1.4534	11.5945	9.4763	3.0985	1.2511	2.2744	1.1264	4.5457	2.6694	4.9707	4.724	19.7659	2.9714	7.2464	4.8294	3.1227	2.7452	3.5189	3.8603	2.2632	1.5377	4.1057	3.031	4.4222	0.4353	1.4501	4.5856	3.0893	3.2046	3.1472	0.4689	5.7901	1.0047	21.2761
DDAH1	3.5529	5.4826	1.5742	0.8691	1.1023	2.589	1.2646	5.5673	2.808	1.1928	1.3461	1.8579	2.8159	1.4144	7.6747	1.2985	0.7108	1.9318	4.545	0.4423	0.6669	2.4711	1.5667	4.05	6.266	5.7267	4.317	1.3589	3.4341	8.6594	1.687	1.1898	2.1662	1.6675	1.3659	3.0631	0.8944	1.3685	1.5379	0.1623	0.6604	2.1546	5.6179	1.167	9.8687	0.3418	5.2207	3.9054	2.6528
DKK1	0.7076	0.4337	0.5654	0.2919	0.0562	0.3961	3.1029	0	11.7428	4.4013	5.1197	0.1351	0.7838	0.2656	3.4124	0.551	73.5615	0.2114	0.1744	0.756	1.7054	0.9791	12.8288	2.4147	0.0396	7.4554	40.9043	0.692	0.052	11.3723	1.3321	0.9877	13.051	151.656	0.0791	1.0727	0.1062	33.4555	0.2603	0.1676	0.6002	0.3321	0.2046	0.4413	0.1295	0.0767	2.3721	1.5923	0.3424
DLC1	26.6589	9.7926	1.9561	1.2921	12.0268	3.3778	6.8746	6.0933	20.1047	9.4651	11.8741	49.3015	32.394	122.767	58.6029	8.0481	26.2667	67.6904	106.145	3.9701	6.0406	7.0878	6.7523	4.408	11.2362	7.7654	13.0984	5.8729	28.4536	24.1163	31.4595	9.7442	9.3499	4.8135	6.2288	9.5306	9.9329	2.2196	84.492	3.1245	3.3434	86.8947	60.8819	2.0213	13.1286	2.3819	16.9	1.2555	41.0934
ELL2	16.7864	10.3074	1.161	7.7065	3.8465	1.4697	10.114	0.596	4.0569	5.8397	15.2834	17.1654	16.5836	13.6534	23.5271	1.0101	18.2517	6.6377	9.8343	2.4411	4.4987	1.5622	3.0616	10.6178	4.7991	8.3763	9.7976	3.0632	7.7849	3.7156	12.9036	1.6335	8.8201	4.5654	1.491	3.2315	18.8936	2.7156	11.6247	1.4207	1.7048	3.5072	3.1049	6.2795	0.6184	1.6737	12.78	1.381	9.2015
EPHA2	43.4737	12.1706	11.069	137.463	10.1901	18.0571	19.7072	22.1436	50.8342	30.1418	71.3644	9.0002	19.2574	31.0107	52.3867	9.6939	7.1705	5.8668	20.294	15.1721	1.9877	10.5023	9.1661	18.479	51.1268	15.8711	19.9355	28.6195	10.9522	28.9281	12.1462	65.1471	7.7555	5.7043	14.253	25.0346	43.1234	9.4668	112.754	64.4718	8.9838	66.8145	52.8405	2.3305	49.2021	11.4585	18.2743	0.878	12.4885
FOSL1	17.1805	19.964	12.0265	268.44	18.4918	63.0229	49.1327	23.7304	31.2083	131.596	26.8897	43.668	11.0412	240.415	18.1029	13.447	167.318	1.6482	1.6418	5.4874	20.6902	13.9999	103.792	149.873	20.0136	5.0375	85.2275	86.4703	8.0726	0.3332	79.8736	128.107	31.3911	128.487	28.5163	29.104	0.3498	48.2031	47.0056	22.0966	24.4669	17.2498	0.86	17.3407	13.0831	2.6013	4.5405	5.6224	7.8746
GADD45A	29.9334	23.7578	5.7781	6.752	79.0248	13.9952	27.4039	14.0065	190.777	15.3479	33.5997	32.954	18.7	83.8669	20.5985	5.0861	51.5003	19.327	90.9329	29.0395	55.018	50.8325	45.4559	28.9807	28.353	37.0884	52.8586	40.2304	19.7233	40.7784	54.7103	16.0933	17.7385	29.5376	15.3607	8.1241	71.0133	12.7113	47.3693	34.1345	20.4587	54.636	50.984	43.7886	30.8137	15.0161	21.5906	4.2409	33.0037
NAV3	4.607	14.9038	0.277	0.2099	3.8268	0.4265	3.9169	0.2535	2.5385	3.4777	8.5683	8.0771	2.728	0.6865	9.0003	0.341	6.5468	3.9378	0.6125	0.959	2.304	1.1115	5.3894	3.9642	1.7669	1.6897	3.2547	2.405	2.4466	2.4942	7.4732	0.5924	1.323	4.0662	0.7408	4.8952	2.9973	0.4792	10.4383	0.7886	0.4883	1.1739	2.0141	1.9022	2.4688	0.6469	2.9177	0.2813	1.6742
PAWR	5.4519	4.6657	0.4357	1.3494	7.0164	1.2923	6.7209	0.8447	1.1504	4.4795	3.1972	5.4446	0.3166	8.6775	2.6579	0.375	0.2948	1.2775	16.8052	2.0995	2.0405	1.9181	0.9744	7.4424	2.2561	4.4856	4.5199	4.621	0.2602	11.9802	4.9495	1.1926	0.9808	2.9072	3.0521	2.3683	2.1962	3.6259	4.2577	0.3713	0.4256	0.1237	4.059	0.837	3.9581	0.4109	1.1677	1.6167	3.9373
SH2D5	3.8137	1.3334	1.2095	8.3723	1.0016	0.1715	0.4751	0.6441	0.1	4.7799	3.2972	0.8694	0.413	0.2748	4.186	0.0182	0.6648	0.0654	0.0863	2.9938	1.2175	0.1856	0.6429	2.0948	0.206	1.9363	3.8466	2.9495	0.2829	4.8583	5.2244	0.5366	1.2847	0.6016	1.4224	0.5582	0.4834	0.3807	1.0567	0.7156	0.8507	0.6027	1.8083	0.2689	0.2106	0.2279	2.7397	0.6777	0.1173
SMURF2	11.6763	14.2203	1.2498	0.5437	9.3118	2.5688	6.4474	1.5644	24.822	6.6245	16.3238	18.979	8.3774	102.278	12.3195	3.6706	11.4456	11.0807	10.0491	4.0157	4.0091	4.15	7.8022	11.5134	10.6424	6.8444	14.7097	10.2868	14.1753	9.2265	16.9202	4.8587	7.7023	9.0915	4.0345	7.9612	4.6023	5.0915	16.7944	1.8194	4.8216	4.0833	8.1531	8.7908	6.9649	1.6588	13.1694	1.3517	16.7401
TEAD4	33.4384	27.5911	53.4256	22.0407	49.2518	23.1525	47.0078	82.927	24.1675	92.6705	20.0196	33.9517	13.1324	20.3159	31.1414	30.4664	85.1112	15.6572	3.7167	34.1055	15.4645	22.0246	44.1576	27.5358	42.1584	19.6113	68.0455	64.0288	23.5877	48.1869	57.5978	49.9305	47.2002	92.285	63.9065	39.0971	37.537	15.8802	67.0486	9.3481	39.8159	21.5051	16.2347	27.6066	16.088	8.3757	54.6667	9.545	47.6752
WWC1	0.0981	0.2062	2.9583	3.0252	8.6804	2.7812	1.9375	7.2926	0.3432	9.9273	5.6574	6.3397	0.4122	2.005	14.4136	0.0971	1.0391	1.3154	0.2561	0.7217	0.8308	2.2073	1.2901	0.4552	1.2137	0.5475	5.7264	0.7199	0.2003	7.5573	6.6593	0.1168	1.8568	0.106	7.3177	4.1809	4.0176	9.1194	7.4386	0.7385	0.1563	1.824	3.1225	0.6357	3.2513	0.896	1.5466	1.0785	12.7366
ACAT2	12.3289	29.0882	4.2318	7.8483	99.2983	14.2922	39.6034	3.5407	13.428	28.6382	15.961	23.9471	16.4496	14.9537	30.0509	3.2463	18.7701	7.6494	30.3525	17.2325	2.5117	4.6809	21.2868	22.334	11.8254	0.7165	21.0912	10.2888	12.9002	0.9134	21.6465	36.3934	11.1086	17.6673	47.5258	4.5371	6.1646	14.2724	22.8967	2.6275	15.7041	13.6386	33.4021	13.7136	11.9389	1.0721	25.731	3.1686	11.3721
ADAMTS6	0.4349	2.0423	0.0314	0.0303	0.0219	0.1797	0.1331	0.0231	0.4863	0.247	0.521	0.2382	0.6819	5.9596	0.9362	0.0667	0.0891	0.9249	0.211	0.0735	0.1446	0.2323	0.1418	0.0646	0.0617	0.1074	0.0547	0.0399	0.3975	0.3181	0.1196	0.0312	0.5192	0.1379	0.041	0.3852	0.0661	0.1496	0.297	0	0.0424	0.2698	0.4017	0.2377	0.0623	0.0637	0.5343	0.2431	0.0137
ANLN	13.3062	57.9736	4.3003	1.4215	49.2549	4.5474	26.4473	7.6386	5.0649	35.4714	70.4408	89.0877	31.9888	50.6139	46.0184	1.6666	77.092	22.9758	95.8649	20.463	4.0447	11.9194	24.5913	95.1007	11.4058	19.8732	39.0549	20.5167	38.1595	24.8161	124.013	41.309	12.642	81.2342	26.8112	3.1986	3.1688	15.9365	78.996	3.8489	12.9827	15.4225	16.6794	18.3304	18.9532	6.332	50.4744	4.7342	10.2721
ANXA2	211.875	150.001	162.276	151.971	290.074	168.088	585.198	105.45	304.457	96.0501	236.733	120.171	181.847	314.115	198.132	350.396	640.567	122.759	95.5961	129.833	87.1452	58.6339	396.296	215.93	406.783	134.026	246.15	254.965	85.6243	128.357	282.094	270.68	392.397	150.846	299.696	96.0252	118.289	209.601	168.771	67.8943	148.238	58.223	67.0806	142.337	30.2564	78.5033	129.174	63.5213	398.297
AXL	8.31	7.6933	6.7878	5.259	1.8846	9.4562	6.026	2.7377	133.091	6.1384	4.7511	17.0555	48.7858	196.718	6.397	6.3569	8.6078	12.2759	1.5715	1.8261	3.2206	4.632	6.6046	1.9923	7.0902	6.7889	56.2788	6.2034	22.6691	4.6339	1.6624	3.0536	29.1171	96.2805	1.6195	5.2712	3.6555	6.097	7.5234	0.3354	3.5641	9.2996	4.678	13.2758	0.6801	0.7171	28.7953	1.6931	4.0566
C12orf75	5.7923	6.3449	6.2953	3.1895	2.7583	2.8583	6.5725	1.6319	6.1392	17.4451	7.2643	4.5463	12.5538	32.2943	8.3818	0.5908	32.5626	3.2468	4.3381	1.7666	7.9792	1.8383	18.4169	2.2174	6.4561	2.7517	7.1296	7.229	2.7854	12.4146	9.1695	0.6755	6.0953	4.7825	12.8064	6.5785	0.9806	5.0902	8.2235	0.7085	15.2542	1.8989	3.278	6.0474	5.7201	1.6075	6.8373	1.4605	15.6408
CEP55	12.1501	19.0578	7.4273	1.822	21.7747	12.1456	43.5533	4.319	2.9597	26.8658	25.7463	44.3142	19.9651	17.6935	43.739	1.6859	32.8645	12.8919	7.4724	15.8168	9.141	16.4201	26.527	32.5593	18.2697	11.8642	26.2228	10.7411	30.3321	19.8717	31.9843	55.1962	16.9982	90.7276	14.0022	7.722	4.6854	15.9345	23.5436	3.1109	14.213	3.8547	8.5995	35.5331	6.2534	5.5621	24.9669	8.2152	17.4383
CLDN1	358.095	20.5438	3.0782	25.6497	0.0688	0.1515	30.338	0.4583	1.8899	6.5751	0.8762	1.4226	0.3715	0.4877	10.7327	10.2663	4.4555	0.3882	211.425	7.0195	0.0201	0.204	5.5101	51.4498	43.5669	2.9441	5.956	7.3899	124.897	0.4911	0.8782	0.1475	2.754	1.0696	0.1775	2.0038	0.2729	21.0812	0.2072	0	0.0501	124.185	0.2684	0.1455	139.288	0.0658	0.0587	1.0021	0.0967
CNN3	391.114	264.08	72.4721	20.8942	287.371	53.855	206.637	60.8756	136.036	127.761	116.534	204.394	139.336	245.78	205.649	51.6279	355.28	191.06	476.004	31.2235	6.6742	67.6118	222.493	328.781	82.5435	121.604	433.05	30.9568	420.308	188.068	262.98	74.5961	242.948	287.915	101.2	46.7114	92.5636	122.956	211.78	43.0246	49.5513	288.358	11.1954	66.9436	75.7201	57.2491	9.6948	5.4393	347.013
COL12A1	18.3102	13.9439	21.1441	4.3622	8.996	7.4832	19.4616	8.5795	43.3004	3.1324	16.3376	2.6154	2.6948	63.3039	11.2629	1.5458	17.0786	4.5411	5.3206	12.7059	2.2349	3.3616	11.4775	11.175	3.6953	1.0194	6.5918	9.0699	3.8689	5.5412	7.1697	8.7183	7.0497	14.575	2.5189	7.2037	0.7102	1.5634	3.7752	0.3467	3.286	6.255	3.1667	4.995	5.4461	0.598	0.9038	1.1306	4.2787
CPA4	0.0441	0.1409	1.2238	14.4948	1.2144	0.5834	10.6975	0.14	0.1943	0.0369	0.1699	0.3791	0.1277	2.6823	0.0139	0.2371	2.9447	0.1038	0.0489	3.005	2.2084	0.0234	0.1407	2.5424	0.1112	0.0904	2.5522	0.1294	0.2624	0.2118	0.4888	0.2163	0.3606	0.1563	0.0888	0.9106	0.274	0.1834	0.3068	0.0235	0.2602	0.0994	0.0328	1.1239	0.7784	0.0258	0.2689	0.0585	0.2365
CYTH3	199.154	620.67	76.6186	32.6304	250.645	51.3839	261.231	113.57	55.6843	226.336	273.975	69.3155	144.225	138.864	471.632	19.8638	164.995	89.9025	112.042	170.103	29.422	38.7621	174.011	419.342	54.9213	91.9346	85.8348	282.365	156.87	67.9747	422.842	303.824	139.769	98.7901	82.8594	113.08	22.0752	79.1139	498.36	27.4585	105.322	207.948	63.2115	98.9835	89.6455	74.4897	137.421	27.9469	190.683
DIAPH3	1.7265	9.4428	1.3972	0.259	5.9099	0.9383	10.899	1.7	1.163	4.1598	13.0249	8.7548	6.7013	5.011	10.2356	0.5747	13.0332	5.7387	8.6112	1.2888	0.5624	3.4967	4.7504	12.409	3.2313	5.157	4.4309	6.8812	8.0499	6.6718	8.4079	8.4066	3.6286	6.574	2.9344	1.2742	1.1049	1.0874	8.4036	0.4601	2.5358	3.4631	6.3477	3.1453	14.4437	1.0619	16.5567	0.5148	3.4865
EPAS1	45.7744	68.9572	32.4794	25.5532	21.6093	21.0694	33.3748	72.9404	17.7801	14.4979	37.7903	83.3518	28.4219	57.751	65.134	35.1439	51.8202	30.9065	28.0896	10.8146	26.8343	20.7565	12.4596	15.6596	26.5568	57.681	72.5508	42.4638	44.5638	39.5298	40.2676	19.9976	70.3713	131.196	31.1517	15.1655	48.6872	9.2893	84.7391	9.7081	37.7614	30.0509	19.96	37.8274	5.8538	5.3204	114.586	9.0074	42.9511
EPB41L4B	0.0443	0.1223	0.222	1.0367	0.0396	0.1256	0.7362	0.1206	0.0163	1.3796	0.4267	0.0686	0.0428	0.1089	1.5195	0.0155	0.2994	0.3798	0.1556	0.3641	0.037	0.2525	0.0899	0.5754	0.0056	0.0519	0.3396	0.1626	0.1758	0.3857	0.0289	0.0204	0.1951	0.0857	0.2304	0.4032	2.6513	0.7642	0.0954	0.0059	0.0077	1.0484	0.1483	0.0096	0.5996	0.0519	1.3441	0.1258	0.0148
EPG5	16.6599	66.0759	9.1202	1.6289	20.9589	11.9573	79.1392	14.3289	7.7429	18.7821	26.417	39.7773	21.4244	9.0209	11.648	3.5744	16.9322	7.5778	14.5355	18.0795	10.8385	6.3013	15.0979	43.6886	8.6236	12.9347	8.9166	62.7292	22.5047	8.7324	61.746	54.6277	22.1032	16.0162	10.5549	9.8641	7.0508	6.9701	30.0778	4.8197	13.3932	7.3343	8.9825	17.7041	6.8722	5.1416	27.8214	2.6696	40.2946
ESM1	2.681	2.5615	0.6331	0.5177	3.2463	1.2663	1.8786	0.7648	99.6913	3.3873	7.6076	1.8727	5.716	89.1708	10.4862	0.2425	0.2319	3.3352	1.1029	0.2339	9.0374	10.9306	0.7708	4.7855	1.586	1.9744	5.5418	7.0096	17.8976	3.971	2.4095	2.5043	0.9381	5.1185	15.095	1.2254	0.543	4.9176	1.7613	1.8324	4.4114	7.233	2.0495	1.2323	8.9114	0.3672	1.9768	1.4733	1.6516
ETS1	128.441	138.058	17.0893	9.6708	19.4976	18.6424	98.9784	44.2724	11.079	133.216	148.965	173.457	107.187	17.2352	194.597	24.6802	152.309	50.7446	97.8421	18.4574	11.707	29.9768	163.189	89.9927	41.4238	61.293	47.8088	127.999	122.634	67.8171	157.147	134.875	105.135	54.9589	44.3018	44.4518	77.3243	21.8447	150.966	14.8416	24.3154	92.8993	101.465	55.7694	33.4242	11.1479	154.788	6.8794	293.111
F3	1.9159	1.8623	2.2068	14.3869	3.9798	1.6765	4.5181	1.7697	1.8873	1.2133	2.902	1.622	5.0593	5.9452	1.5034	0.7492	4.7837	2.684	32.9658	7.2485	1.0348	1.2184	2.4726	5.575	1.5557	3.3823	1.4604	1.8343	2.4792	0.3268	2.5038	1.0197	2.3207	0.3118	0.3855	1.3124	0.8333	2.3823	3.5262	0.0161	0.5249	0.6304	0.4723	0.5486	0.7686	0.2717	1.1801	1.2139	0.223
FJX1	10.2087	5.7741	7.0649	8.5275	25.6071	4.319	7.6244	11.7494	13.7163	28.1067	4.9801	1.796	1.9373	18.6972	18.1697	1.2378	24.5382	7.9023	1.0999	1.9192	2.5128	8.9994	8.0983	10.2951	1.8294	11.3852	17.9342	20.796	4.2928	2.3958	0.6621	6.9606	6.617	23.6559	4.5996	10.8925	0.9015	4.1	11.6798	0.8317	5.2128	12.037	8.4443	1.8489	3.6195	7.0413	12.6516	3.8876	11.2334
FSTL3	138.553	19.1409	29.5155	24.8145	5.2276	6.1815	45.5908	78.8459	98.0117	26.0725	17.3141	16.9975	27.9403	52.6988	41.6471	66.5662	56.2464	16.6005	5.1713	19.9765	26.9698	26.5576	21.1412	5.086	9.6652	25.0054	24.4391	68.8592	25.0552	30.3735	16.2457	15.4712	73.2517	146.398	21.2166	17.3016	19.0919	131.969	12.0869	8.1473	56.4142	25.0308	15.4732	11.9321	11.4308	12.8909	9.4572	11.9543	55.3185
GADD45B	14.374	12.2606	23.7465	45.3293	45.5758	33.8939	12.0354	6.5741	18.1631	4.4698	13.5249	32.057	38.1656	15.3481	17.9299	12.3454	17.3926	22.342	7.8492	12.4678	41.9053	15.8187	20.3808	4.5256	52.7037	7.3623	19.0558	9.1055	40.5365	7.5981	35.2349	15.5161	21.0554	30.0935	8.0517	18.2868	19.6072	13.0828	46.8421	3.9179	19.9225	18.1225	13.6621	27.8592	3.2278	5.8035	15.6812	14.4697	10.1241
GFRA1	0.0306	0.8651	0.0803	0.0717	0.1972	0.7933	0.2611	0.0751	4.0831	0.0384	0.5988	0.4677	0.1834	16.9127	0.3933	0.2449	1.0741	0.5439	0.6662	0.0295	0.0844	0.6676	0.3731	0.0233	0.0232	0.1991	8.7155	0.054	7.6023	0.0773	0.5094	0.0338	0.4394	0.0178	0.0863	1.9816	0.1589	0.0855	2.0462	0.0098	0.485	0.0518	0.1504	0.2541	0.0606	0.639	0.9248	0.0766	0.5915
GNGT2	1.6196	1.1107	2.6554	2.2069	0.5913	2.7019	1.4384	0.5392	1.2141	0.3023	0.6877	3.1625	10.6731	0.6667	0.4877	2.3912	0.8626	1.5982	0.3439	0.29	1.2507	1.4244	0.6592	0.2946	3.6745	0.7565	1.109	0.1011	4.4412	0.8067	0.1684	0.6019	4.8105	0.4329	0.104	1.8808	1.7309	2.2502	3.7658	0.1653	0.5381	0.6696	1.2682	3.7051	0.0243	0.3027	3.7179	1.0958	0.1385
HBEGF	9.6747	18.0257	6.9	131.418	15.2402	2.7399	5.1403	8.8587	27.0467	13.1505	35.8828	6.3829	6.9306	27.885	43.0175	1.7464	5.9399	7.6149	14.0099	5.6158	6.4557	13.5548	11.4589	4.6969	4.7107	19.6391	18.5929	7.5675	22.2699	19.1732	10.7515	5.2432	16.2307	3.2353	7.8724	8.7445	14.0359	4.6417	7.6968	1.7743	5.2484	17.2012	13.5899	6.2788	11.8974	0.855	31.0043	1.4702	19.9373
IL11	0.0435	0.2272	0.1842	6.8263	0.5128	0.2053	0.1111	0.2366	51.3984	1.2531	0.1141	0.1121	0.0839	28.631	0.6357	0	2.3574	0.0438	0	0.209	0.272	0.0518	0.3591	0.289	0.0164	0.2672	0.4996	1.5304	0.0862	0.0391	0.2125	0.1399	0.3075	9.1355	0.0656	0.1141	0	0.2551	1.1012	0.0348	0.2262	0.0184	0.1939	0.0845	0.2761	0.0764	0.1391	0.037	0.0437
IL12A	0.387	0.3631	0.1376	0	1.1175	0.0844	0.0507	0	0.1967	0.9329	0.3127	0.1535	0.6032	1.8924	0.2528	0	0.3904	0.4803	0.033	0	0.149	0.0947	0.1035	0	1.2383	0.6535	0.0684	0.3494	0.1771	0.1072	0.0291	0	0.1685	0	0	0.7187	0.0724	0.4369	0.2958	0.0238	0.031	0.0252	0.3652	0.0771	0.6934	0.0174	0.4355	0	0.0299
IL7R	3.9834	3.3268	1.3857	1.1899	0.4459	1.1051	2.866	0.1052	1.4583	0.1575	2.8536	11.6043	23.732	3.5359	0.6204	0.3456	1.4521	5.4588	7.9019	0.2208	0.2178	0.4995	1.0929	0.2755	3.9263	0.7386	0.3334	0.1277	3.2397	0.2437	0.4631	1.2088	14.8279	0.6166	0.0292	5.155	6.4622	0.2625	8.0875	0.0232	1.5701	0.0327	0.7871	4.3459	0.0341	0.0963	4.694	1.2243	0.6997
ITGB2	64.5504	24.8235	45.6138	19.8799	9.0693	39.7651	19.0262	5.568	23.7328	4.5348	24.9999	151.232	353.514	12.8718	8.1073	28.0025	7.2214	43.9112	10.1201	3.1677	4.9628	11.814	11.3168	2.4228	48.7769	20.4528	27.0068	1.7775	114.041	22.7643	2.7997	26.4061	116.557	4.4869	2.7363	25.6576	24.0131	13.3725	62.9573	1.3075	11.5816	8.8547	33.0457	70.2044	2.3681	1.4143	95.478	5.0908	22.0497
KRT80	1.6938	4.566	4.1417	142.27	0.2575	0.063	47.2731	0.4173	0.4552	1.1367	0.0841	0.0688	0.0643	2.7522	2.4918	0.4768	4.6261	0.4034	0.0296	6.3327	0.2337	0.0212	1.9831	9.6923	0.1412	0.0586	4.4763	1.5457	0.0264	0.1681	0.7953	0.2697	1.2454	1.8043	0.0403	1.0359	0.0648	6.7324	0.0795	0.064	0.0555	0.0676	0.0297	0.2073	0.0377	0.125	0.1585	0.1742	0.1206
KRT81	0.0302	0.0789	0.2325	0.3193	0.0647	0.1995	0.3341	0	0	2.3447	0	0.0933	0.0582	0.0556	0.3701	1.29	0.3596	0.0304	0.0335	0.0363	0.151	0.048	0.0525	0.0287	0.2282	0.6888	2.3236	0	0	0	0.0295	0	0.3415	0.4956	0	0.4117	0	1.3504	0.06	0	0.0314	0.0255	0	0.0782	0	0.053	0.1104	0.1713	0.0303
LAMC2	0.129	0.337	1.8549	5.9511	0.2582	0.2355	5.3607	3.7721	0.142	0.1509	0.587	1.4273	0.3235	0.7682	0.3488	0.0844	3.0333	0.182	0.4767	6.4073	0.0108	0.1162	0.3289	3.7405	0.0975	0.1208	0.1779	2.1315	0.2301	0	0.311	0.1265	0.5352	0.3157	0.0259	1.0467	0.0348	0.3091	1.1701	0	0.3043	0.1453	0.0671	0.1002	0.1881	0.0352	0.2437	0.3076	0.1123
LETM2	0.8473	1.7498	0.4255	0.1962	1.0618	0.2338	1.0299	0.4533	0.9747	0.8114	1.2699	1.0405	1.8003	3.2974	1.1857	0.1668	2.1219	1.5069	0.5173	2.117	0.6195	0.8475	1.8376	1.049	0.3096	0.9195	0.7659	1.1312	0.9815	0.9942	1.1074	0.7526	0.8351	0.8003	0.8523	1.1291	0.3779	0.6007	1.0119	0.2588	0.773	0.9007	1.55	3.0706	0.3494	0.1673	1.1228	0.2108	2.2677
MB21D2	10.1662	7.4986	1.435	1.5026	0.3465	1.2745	5.034	0.9048	1.0251	6.2399	4.7701	4.1147	2.5118	4.1137	5.8093	1.1188	1.1551	2.0883	2.1283	0.3426	0.9037	1.9485	1.2722	1.1553	4.3398	3.9043	7.9719	5.4358	0.9419	2.8057	4.0309	0.3494	5.3052	8.0974	1.644	2.6127	4.7724	3.1369	1.0572	0.1519	0.811	2.3116	5.5098	1.28	1.1533	0.8903	4.4651	1.3057	5.3478
MFAP5	1.0177	18.3437	2.2719	0.9001	4.8955	26.3666	4.156	1.9547	0.3955	0.1876	0.0943	0.4938	0.361	0.1654	4.4625	3.0211	0.5708	4.4212	0.1162	1.3313	0.5432	5.5319	1.6267	0.9952	0.6791	0.3285	0.6537	0.0878	0.2374	0.1617	0	0.0688	0.4658	0.0145	0.1656	0.6755	0.1334	1.4934	0.3122	0.1915	0	0.3034	0.8012	1.3183	0.0211	0.9992	0.0958	2.3201	0
MPP4	0.0709	0.0412	0	0.0132	0.0254	0.0447	0.0101	0.0241	0.026	0.0148	0.5214	0.0244	0	0.882	0.5577	3.7697	0.4368	0.1192	0.0262	0.0853	0.0296	0.0094	0.185	0.0786	0.0447	0.0208	0.0815	0.0173	0.0117	0.0426	0.2427	0.0761	0.3456	0.0343	0.2022	0.459	1.0534	0	0.0235	0.0284	0.0246	0.1198	0	0.1684	0.2169	0.1592	0.2162	0	0.4871
MPP7	0.1604	0.1644	0.1236	2.0603	0.0101	0.4903	2.452	0.0321	0.0104	0.0355	0.6642	0.3503	0.51	0.0869	0.4809	0	0.5062	0.2664	0.2198	0.2723	0.5788	0.03	0.2216	0.9414	0.1356	0.0249	0.0325	0.2215	0.1591	0.136	0.1292	0.0434	0.2314	0.0091	0.5792	0.2972	0.6576	0.0346	0.1875	0	0.0884	0	0.0632	0.2201	0.0133	0.0166	0.0949	0.075	0.0664
NLRP3	1.5062	2.3789	0.9247	0.341	1.7992	0.5784	1.8046	0.125	1.9279	1.8571	0.8618	2.8284	6.2385	10.4799	0.8088	0.4806	1.7807	1.7038	0.4889	0.2797	0.2759	0.7787	0.6389	8.2243	1.1113	0.8494	1.1964	0.4311	2.865	0.7056	0.0838	3.9175	3.5113	0.142	0.1355	0.8226	0.7242	0.4043	3.6375	0.1175	0.4462	0.2379	0.6419	1.3801	0.2333	0.3658	3.8627	0.1947	1.0216
NPPB	0	0	0	0	0	0	0	0	0	0.103	0	0.0848	0.0793	0.0757	0.2327	0	0	0	0.0912	0	0	0	0	0.1562	0.1243	0.2887	0	0.1206	0	0.148	0	0	0	0.0794	0.0827	0	0	0	0.0817	0	0	0	0	0	0	0.0481	0.3758	0	0
NUAK2	6.797	1.1812	4.7085	110.821	2.3378	1.3782	3.7868	1.0625	1.096	3.2484	3.5155	10.9023	9.506	1.2175	3.5307	2.2737	3.969	2.9073	0.8185	1.4443	1.0525	2.2376	3.5669	2.1523	6.3473	2.2456	5.3464	1.6115	4.3731	2.3489	0.5873	2.1775	11.7211	1.559	2.1584	3.2067	3.8519	1.4482	6.5138	0.3019	2.1084	1.4355	1.9716	6.8704	0.2544	0.5026	8.3018	0.6043	1.0869
OXTR	0.1289	0.5728	0.0397	0.0144	1.0648	0.1583	0.2746	0.0439	1.5757	0.808	0.1896	3.7759	0.3857	1.7936	0.8273	0.0181	1.168	0.858	0.429	0.0775	0.9198	2.2549	0.1009	0.098	0.3023	0.8378	4.1793	0.2081	0.5241	0.1857	0.3403	0.3437	0.1824	0.0498	0.6097	0.5143	0.0731	1.5893	1.2041	0.0928	0.1342	0.403	0.2732	0.2839	0.5278	0.0755	0.7663	0.1904	0.7387
PCLO	1.3333	3.5754	0.1843	0.0496	18.3577	0.1178	0.1539	0.0052	0.056	1.5914	0.6441	2.8966	0.0565	0.7056	0.6483	0.6617	0.0303	0.2976	0.0762	1.0491	2.0667	0.2144	1.5244	0.1257	1.8473	0.7284	0.1521	0.5637	0.0782	0.6644	0.0199	0.0468	0.1032	3.6758	2.7697	0.5181	0.7607	2.8657	0.1112	0	2.5879	0.0172	0.0341	1.6019	0	0.3085	1.1586	0.0477	0.4731
PKD1L2	0.94	3.5938	0.2406	0.0783	0.1373	0.239	0.0825	0.1041	0.0585	0.1135	2.3782	2.2252	0.3435	0.0345	0.9901	0.1204	0.1601	0.296	1.2329	0.03	18.4709	0.0496	0.2091	0.1661	0.1417	0.1179	0.9333	0.2245	3.2756	2.4068	0.1007	0.1981	2.168	0.2565	0.1037	0.3114	0.21	0.7653	0.2172	0.9488	0.065	0.029	0.3796	1.9257	0.4518	0.1317	0.3512	0.2199	0.0816
PKP2	0.0334	0.0727	0.0579	0.4046	0.0269	0.0868	0.2205	0.0284	0.0184	0.2512	0.3772	0.1808	0.282	0	1.4341	0.0585	0.0796	0.1431	0.2315	0.4517	0.0105	0.0199	0.138	0.0793	0.0379	0.0733	0.0192	0.245	0.149	0.3609	0.1469	0.0537	0.1812	0	0.5292	1.3235	0.3315	0.1777	0.2406	0.0067	0.1217	0.0212	0.2514	0.0433	0.0118	0.0245	0.0229	0.0474	0.042
PRKAG2	2.296	4.4168	1.1249	0.4795	0.3496	1.0208	4.3371	0.9087	0.5227	0.4752	2.847	2.4844	2.4512	1.4264	2.5977	0.7599	1.3092	2.297	2.3497	6.9977	2.2171	0.8478	0.9212	4.4664	3.5128	4.2124	4.5734	4.7144	0.6182	3.2985	3.1242	2.3484	2.3928	7.046	2.7981	1.9078	5.0608	1.357	5.3081	0.3824	4.9093	0.5298	1.6201	3.8325	0.2401	1.5439	4.516	0.9537	5.1888
RAB3B	0.1548	0.0952	0.0597	0.1395	0.0049	0.0129	0.0388	0.0186	0.0301	0.1199	0.1961	0.0657	0.0703	0.2308	0.4383	0.1628	9.5324	0.2525	0.9495	0.3504	0.0171	0.1882	0.103	0.0735	0.0034	0.052	1.1778	0.0468	3.6255	1.1727	0.1692	0.0377	3.5439	0.0264	0.0092	0.0382	0.1254	0.1036	0.0769	0.0036	0.0237	0.7964	0.2793	0.0413	22.8017	0.064	0.9619	0.0103	0.119
RAPH1	2.0984	1.5662	0.247	0.1143	0.6768	0.0804	1.0665	0.4122	0.193	1.7889	2.3513	1.6576	0.633	1.9746	3.771	0.0597	1.4386	0.9291	2.116	0.1746	0.1379	0.0796	0.6532	0.6993	0.3106	0.5673	0.4893	0.8596	1.8171	0.3607	4.4942	0.8425	3.3113	0.9436	0.2015	0.3101	0.5924	0.1617	4.1046	0.1081	0.9749	1.9885	0.1676	0.5774	0.1944	0.0821	3.6403	0.1081	3.9162
RFTN1	16.6959	7.4209	8.3135	10.6434	3.4424	6.5023	29.889	2.7978	11.7035	19.4727	7.012	14.4345	27.7789	6.1724	10.5947	5.1069	13.5144	10.1269	5.1566	2.8314	5.4069	7.5477	6.1974	7.1417	68.308	12.0773	6.2564	4.5655	12.4017	5.2303	6.7289	4.2409	16.4383	61.1589	2.0381	14.7951	4.756	10.8439	12.2701	0.7709	3.4303	6.1553	8.1665	13.3117	3.032	1.208	25.4421	3.6939	5.1767
RGS7	0.0226	0.059	0	0	0	0	0	0	0	0.0283	0.0475	0.0699	0.0218	0	0.0426	0	0	0.0228	0	0.0543	0	0	0	0.0215	0.0342	0.0397	0	0	0.0448	0	0	0	0.0639	0	1.5002	0.0474	0.0366	0.0497	0.2469	0	0	0	0	0	0	0	0.0826	0.0128	0.0454
RNF144B	52.2945	42.5643	4.1112	6.9013	3.7422	7.1345	27.4983	0.8193	7.2619	11.6669	14.0687	19.069	21.7639	4.2617	23.3444	10.5637	9.2036	18.8269	12.0577	11.9606	3.0708	15.8008	14.5533	33.4564	9.8655	9.1024	10.932	19.4513	7.7106	10.296	82.9751	13.5341	69.8886	14.324	14.1768	23.4032	30.2204	4.9715	11.3945	0.198	27.2892	12.4565	5.9374	8.4276	5.7593	1.6678	54.1529	3.1639	119.548
SFTA1P	0.0915	0.1115	0.1128	0.1528	0.255	0.1901	0.0779	0.1244	0.1208	0.0459	0.0192	0.0377	1.659	0.0506	0.2071	0.141	0.0654	0.166	0.1826	0.044	0.206	0.5234	0.0318	0.0521	0.249	0.1124	0.4836	0.2683	1.0336	0.0329	0.0179	0.0504	0.5521	0.2828	0.2392	0.0576	0.1037	0.3489	0.0727	0.1316	0.0571	0.2472	0.0204	0.0474	0.284	0.1286	0.0334	0.1039	0.0184
SGMS2	3.0036	5.3459	0.376	0.7896	1.627	0.6481	4.9352	0.7416	0.6966	1.9014	8.9999	3.6788	1.1989	1.5801	3.9562	0.1389	5.9699	1.6064	1.2343	0.2657	0.7537	0.7029	1.7367	3.1936	1.0608	2.1085	5.0995	2.4715	0.7709	4.118	5.2985	0.1472	1.4093	4.1325	0.6979	0.5121	0.3088	0.9005	1.6283	0.0183	1.8649	0.4508	0.7737	2.3898	0.0968	0.1116	3.7778	0.4112	0.9578
SLC8A1	0.7434	0.5528	0.0798	0.0517	0.2136	0.2132	0.2307	0.0181	0.2894	0.3694	0.4462	1.4345	4.1449	0.247	0.2656	0.147	0.1203	0.621	0.1943	0.0638	0.0631	0.3292	0.1639	0.1438	0.3373	0.5059	0.2808	0.2765	1.5556	0.3729	0.5476	0.227	1.2646	0.0667	0.219	0.2341	0.2624	0.3195	0.8994	0.0127	0.1299	0.157	0.2754	0.6741	0.326	0.0466	2.1751	0.0694	0.2135
TGM2	88.9242	9.0841	44.816	7.2957	5.8432	18.1864	4.8219	6.3763	19.8901	18.0264	78.2553	20.6747	93.0343	48.8013	18.6775	16.8252	1.9814	19.9126	5.2461	23.9081	19.3373	6.4614	9.131	30.3651	11.5024	23.6819	14.6793	18.7893	45.265	8.2546	3.0138	22.3769	56.0377	135.827	12.0598	5.6416	14.3872	24.8497	16.5872	1.8736	36.9802	30.029	9.1224	40.7906	1.044	1.6941	27.4518	6.2335	8.0376
TK1	52.8093	87.7196	324.596	54.7767	275.537	123.67	88.571	167.319	18.6163	94.4593	228.961	198.458	117.674	39.378	185.299	81.2144	111.866	49.2357	63.6703	164.387	55.1927	28.211	118.773	129.79	238.306	65.8147	101.635	134.486	141.391	225.684	172.049	262.945	152.673	110.897	145.415	72.9759	23.3089	72.4924	136.737	32.6131	73.791	80.6706	116.135	86.0211	74.3408	19.5471	123.97	31.7974	39.9837
TNFAIP3	21.185	11.6944	9.8357	8.0564	15.2546	9.8474	127.288	33.3366	8.9776	24.5054	19.3438	25.2484	69.6699	4.012	6.8964	4.0836	27.1153	10.9774	13.1659	28.4868	11.2051	3.7381	18.5012	74.1605	12.5084	29.1991	11.5026	48.6648	19.4059	5.6313	46.1181	126.486	29.6723	63.9191	62.142	10.8198	7.9013	153.25	49.5835	8.696	50.3525	3.2486	4.2498	52.7548	4.6105	4.6603	29.5788	36.2941	58.1053
TUBB6	61.6597	90.1479	75.4288	131.247	116.608	38.3654	76.3001	36.1568	113.803	114.876	64.205	57.2745	59.4358	98.9369	143.884	50.6704	206.684	21.9183	69.6548	94.6935	20.6267	35.9233	207.559	93.3804	59.5515	53.9849	366.814	65.8636	33.0013	27.8698	150.87	67.53	80.8635	172.02	50.5152	26.9716	27.5915	53.8539	78.2019	5.7506	82.1131	28.908	3.9694	47.9811	43.7148	10.2409	133.223	21.6038	102.336
VGLL3	0.3472	0.8955	0.1936	0.1705	0.2646	0.4531	0.8095	0.115	0.1861	0.0973	0.8397	0.391	0.5642	0.2315	0.5173	0.0608	0.1688	0.4652	0.3192	0.1428	0.0915	0.3051	0.3098	0.473	0.2349	0.1123	0.0578	0.1743	0.4937	0.255	0.3528	0.21	0.1508	0.0971	0.2574	0.4507	0.0629	0.1877	0.2996	0.0183	0.0999	0.4091	0.2497	0.1835	0.0774	0.2274	0.071	0.0934	0.1745
WWC2	8.9209	16.2621	0.4215	0.2657	2.4527	0.5497	6.3697	1.1757	2.5243	6.8705	15.971	11.7427	5.6372	11.161	15.358	0.3956	15.9949	6.7354	10.9188	1.1332	0.6409	2.2435	5.0194	5.8264	3.5382	4.2358	10.0529	9.1258	7.3612	5.6583	13.5218	4.4561	2.5468	12.2131	1.446	2.2965	13.9078	2.0451	12.1634	1.2097	2.9986	4.9947	4.4714	3.7992	3.5402	1.0395	8.5023	1.0112	12.8911
ZNF367	11.887	16.117	1.8003	0.3868	13.1887	7.0833	21.986	1.7289	2.3289	9.4378	41.9496	16.0823	6.1687	17.4946	20.6303	0.8077	30.5201	3.8835	13.1471	4.6681	2.1929	4.9566	6.0121	39.0496	6.7092	8.8296	7.4937	11.9033	9.5934	16.6288	29.8762	19.6201	7.3704	19.2352	10.4497	2.3196	7.226	4.3665	26.4882	6.9419	3.2866	4.1342	7.3061	5.8894	1.4149	2.4685	18.0996	2.2232	17.3901
C10orf90	25.3593	39.5821	16.5577	2.731	3.6332	5.4351	14.5019	0.0293	6.1807	18.6958	18.2768	5.9772	4.4101	7.5989	34.3198	8.2163	2.9099	1.7999	1.4908	34.3485	17.6717	5.078	20.1145	9.8791	9.662	11.1145	9.0484	19.4844	19.2977	6.4292	25.442	32.6351	52.5751	23.4442	20.2101	16.2995	21.4164	17.233	14.9898	6.32	12.8859	10.6389	5.4692	32.2092	1.1006	4.0625	8.1024	4.0307	23.8566
PELI2	19.6345	11.1806	1.5237	0.4623	10.8438	3.1808	4.0124	2.4428	4.3747	19.6638	15.2638	2.6834	6.0838	7.0374	7.5867	0.7126	29.1401	8.1816	12.7021	6.3909	3.3385	3.1289	6.983	15.896	5.2904	15.2827	14.8914	14.7233	8.0911	13.5708	25.0294	9.6207	1.9619	10.6263	4.9076	10.0738	6.2797	2.4979	16.244	2.297	9.2535	15.9566	13.0653	5.9568	10.8027	4.4903	13.432	1.9439	14.6722
NFE2	1.3055	1.6307	0.8351	7.5031	2.7473	0.1629	0.9232	0.4859	5.0982	0.7409	0.207	0.0508	3.1608	8.8267	1.5107	0.0863	0.2936	0.2483	1.2565	1.2139	0.524	0.0196	0.9852	0.6318	0.5961	0.3893	1.1324	0.3975	1.4163	0.0887	0.0722	0.6114	0.3485	0.5236	0.1735	1.7063	0.2794	1.1927	0.1958	0.0197	0.282	1.4774	0.3571	0.4786	1.5472	0.101	0.9909	0.1399	0.0743
MGP	4.2942	13.9972	4.1013	5.4564	26.7029	35.8034	3.1599	5.7051	2654.47	71.6865	5.5056	6.1117	428.122	1864.86	42.0222	26.5939	0.8411	820.635	165.286	1.963	534.128	17.3878	7.9586	4.4623	3.6896	49.8492	5.237	5.7672	10.4729	178.098	6.7402	2.4649	4.2595	2.7663	9.5121	4.8033	4.9	5.9759	3.2446	0.6125	7.2615	4.2408	476.855	2.1676	562.241	6.4349	2.5991	13.5892	15.0356
BMF	19.875	17.2856	4.1252	3.1657	10.0847	5.2488	8.201	8.7152	29.0815	9.0668	14.22	16.2737	14.5164	3.4846	11.3227	17.1134	14.0993	22.7316	3.389	17.096	8.5718	12.8002	23.0885	6.0091	11.4181	4.2502	17.0716	2.0848	24.3325	29.8039	2.4129	6.0018	22.3442	3.2628	1.2147	15.9929	28.7411	3.4731	15.8277	1.4695	7.297	13.387	8.0199	10.2568	3.7556	8.3294	22.6954	1.8021	10.6219
NCALD	13.0114	35.9955	7.2826	1.072	6.8996	6.4873	9.08	0.9353	4.0872	0.1451	1.2465	2.3281	6.5703	1.1533	20.0615	2.4194	3.2001	0.9777	2.9853	9.5164	3.3327	2.974	7.9534	6.0357	5.3467	6.8751	12.3267	0.4565	2.6257	0.3518	0.5589	11.5286	3.4606	26.1522	14.8221	1.0861	1.5361	25.4429	6.8153	2.2565	8.1057	0.6541	0.6376	15.5986	0.1685	2.2928	3.0303	1.0684	9.7902
GAS7	42.3551	421.983	36.8318	27.869	90.9355	20.4001	59.6875	111.111	150.833	111.515	101.709	57.4928	319.712	212.762	222.41	41.6827	145.834	319.667	536.07	117.185	32.4977	35.2164	271.642	88.4764	65.4084	38.1006	89.8173	47.7607	393.592	34.357	58.5779	20.9165	60.1944	175.456	28.0372	84.0563	3.2588	129.659	285.481	3.8391	64.4724	228.724	108.139	135.339	139.203	25.4933	147.39	4.2071	112.74
TRIB2	408.505	382.38	45.6124	26.1393	233.906	105.037	91.7348	116.897	147.072	400.478	372.638	357.033	77.1626	131.135	726.419	224.862	457.99	589.251	185.278	130.793	60.6155	227.851	222.941	186.647	116.563	205.817	222.028	236.072	564.107	493.639	425.367	361.383	221.363	315.541	449.881	580.707	64.6369	276.104	488.642	116.939	116.596	594.732	579.608	212.894	236.716	49.9719	537.441	64.2154	726.737
HTR7	0.0838	0.1606	0.0775	1.5123	0	0.0317	0.5855	0	2.5654	0.1471	0.405	0.3457	0.275	0.0772	0.348	0.0117	0.1599	0.3042	0.0186	0.0605	0.0839	0.1466	0.2915	0.2548	0.0761	0.1178	0.0963	0.0246	0.2493	0.0604	0.0983	0.0154	0.4585	1.4579	0.0337	0.0528	0.0543	0.0861	0.3664	0	0.0873	0.0283	0.1496	0.1737	0.0237	0.0491	0.2759	0	0.1348
GLT8D2	1.2456	2.3251	3.7432	1.0008	1.1259	1.7985	2.6828	1.0531	1.1754	0.223	1.5886	0.4587	1.7169	4.3766	2.0484	1.085	0.3394	1.4173	0.5722	0.5133	0.4899	1.5842	1.3151	7.3191	1.7224	0.6093	3.3132	0.3132	1.1466	0.2563	0.4175	2.3882	1.8462	1.9257	0.179	1.8489	0.6631	0.705	1.1667	0.0711	0.6113	0.451	0.4961	1.4752	0.4019	0.6461	0.2766	1.263	0.3398
MAN1C1	7.0869	16.0938	2.7478	0.7182	7.6904	2.3513	1.7358	0.7238	12.4739	0.5253	8.656	12.2545	15.144	35.4463	11.2931	1.9525	3.6971	3.4783	5.0128	0.8992	0.9523	2.5424	5.3435	1.7458	6.6906	2.7461	7.7305	1.4001	15.9947	2.1945	5.9507	4.5586	3.2905	10.574	3.3603	2.7614	0.6687	1.0409	3.5362	0.5929	1.0606	3.5736	8.1623	4.8699	11.4641	0.4343	4.4455	0.3039	5.3147
DDIT4	56.787	49.7646	35.7882	91.8256	99.7113	12.6344	51.269	13.3004	87.9469	142.668	40.0613	28.0794	116.746	59.3348	67.5135	3.9127	56.1019	30.9981	289.698	107.603	91.529	8.8297	58.5673	41.2658	55.5662	28.912	22.1476	41.0294	141.556	37.7581	12.4654	94.5592	52.7866	50.8471	18.3014	20.254	21.9243	44.6998	188.247	2.6508	79.1438	74.8081	42.0937	120.582	18.439	9.4097	32.2045	4.0067	67.4158
FBXO32	28.6494	60.3563	34.6366	9.0466	70.3906	33.5537	112.856	22.7705	68.0146	37.2	150.036	92.6975	25.744	21.672	99.0191	14.4921	34.4393	41.0497	68.6995	34.7407	90.4125	31.3007	34.9848	39.6714	45.6348	48.5076	150.036	42.0398	40.3322	86.4227	74.1014	104.645	109.974	116.992	113.994	13.3578	33.9423	60.282	47.2588	13.4417	31.9211	18.9897	107.833	126.384	17.3143	17.9033	40.1624	31.5631	91.0545
MSC	26.306	4.6071	23.0936	39.9139	58.2272	12.9842	74.8266	13.9595	4.1548	36.5958	106.615	8.4641	37.182	3.857	21.7548	66.7048	26.332	194.015	45.2395	6.0262	4.8261	39.1279	34.9208	23.2622	7.1034	7.1592	21.4658	15.3554	4.9427	20.4351	45.8842	5.3936	6.5992	2.7149	24.441	8.124	2.5887	6.2651	27.584	0.6827	15.4269	39.0241	228.307	11.8108	41.7388	1.8552	3.3748	41.3886	297.461
HTRA1	16.0384	43.6718	336.753	79.2888	101.374	112.235	62.7564	63.9113	336.579	15.5951	108.356	17.6046	52.6141	941.676	35.5393	57.8747	17.2052	30.2539	1693	17.0401	36.0316	33.2909	160.554	117.879	15.6109	24.5309	397.259	19.4676	19.0029	10.8531	11.9358	15.7663	32.6216	1452.35	37.0836	70.8092	11.2332	218.739	115.568	1.9235	17.3959	14.5761	46.6488	165.905	163.051	10.8019	79.186	29.4231	15.7563
COLEC12	2.0133	8.5621	4.5076	0.7592	1.6832	1.7371	2.7683	0.426	33.2751	0.8742	2.7307	5.852	5.6441	5.7466	2.3859	1.4	12.1216	1.5663	1.3273	0.3621	0.982	1.4114	0.7512	1.0014	2.3617	2.1506	7.3613	0.2209	3.9447	1.256	0.248	2.4702	2.9232	0.6434	0.1754	0.6905	0.3789	1.8145	2.5041	0.0887	0.3796	1.2589	1.8652	2.4848	0.6265	0.2832	3.3772	0.3916	3.7365
EYA1	0.2185	0.0218	0.0144	0.0035	5.9395	0.0531	0.0266	0	0.0206	0.4461	7.181	0	15.0607	0.1323	0.9191	0.0438	0.0298	3.3049	43.1569	0.03	0.0703	4.1988	0.3909	1.3879	0.0236	0.0219	2.6696	1.0808	87.5296	21.0575	0.0244	0.0344	0.0353	0.0543	0.2889	0.0197	0.0304	0.2657	10.8425	0.005	0.2015	32.0854	35.5189	0.089	13.6823	0.0146	1.1132	0.0071	0.0188
KCNS3	27.9855	30.749	5.5059	0.7461	3.3326	8.0855	0.8718	0.5569	4.2816	12.2438	10.5733	14.601	1.6338	20.3982	12.062	12.7941	0.1553	3.9021	0.6809	11.6308	11.6433	4.7775	5.2097	34.2029	52.8809	3.431	7.3144	2.5932	57.4244	1.4742	21.6094	14.95	17.6032	62.2824	12.7289	10.5656	23.8184	3.0035	1.4049	0.1636	17.5492	8.7399	1.3903	21.5728	15.2203	0.0763	15.9411	0.9087	7.7428
CA11	10.0795	30.6665	41.992	15.3569	19.118	12.8553	17.3247	12.8991	8.1665	8.7345	17.7809	32.5984	48.6263	15.3194	8.0432	5.1151	12.7272	27.5317	14.9588	3.4515	8.6091	22.0156	18.4387	8.6089	6.9439	32.4862	34.2744	12.2855	24.1657	37.5378	3.3624	22.1335	15.1774	24.5658	1.9558	16.8262	6.494	35.1769	18.0955	2.6783	12.3919	30.3711	42.2283	22.0067	13.573	2.645	24.6666	5.7237	8.9585
HLA-DMB	17.8788	11.9035	17.9283	12.0151	3.0852	13.9926	11.5216	1.8367	9.4739	1.6288	10.2839	53.0032	83.9514	11.4256	1.8811	7.4197	100.296	62.1295	4.6173	1.4712	2.7159	7.6625	4.5639	1.2345	19.446	11.9207	9.0349	2.2211	29.5698	11.4505	0.9497	6.5881	31.9772	22.1039	0.6981	13.0177	4.927	4.6379	30.9732	0.5952	5.1619	1.7161	11.4821	29.0601	0.4452	0.6577	52.6972	2.3214	4.5147
SH3PXD2A	14.5658	32.4633	25.8585	9.6058	17.0657	11.7155	21.6688	14.0103	8.5524	39.9996	69.3864	23.6366	26.8085	118.451	50.323	6.8397	20.5661	18.9734	7.2693	42.4985	21.6984	30.1894	45.4558	19.6357	15.5418	22.6665	22.2332	8.338	71.3901	4.2168	39.5853	52.6588	92.8774	51.6724	31.0546	7.9921	12.6991	32.1187	14.9868	3.2618	18.1624	22.1591	12.2079	81.335	7.523	7.9709	29.6411	14.8782	43.6818
CFI	0.2149	0.4888	0.184	0.0997	6.4535	0.6541	0.2746	0.0731	13.447	0.0748	0.2006	1.4404	0.6221	12.7033	1.7687	1.5398	1.11	10.629	11.2143	0.0431	2.4803	0.6074	0.3945	0.1588	0.7494	0.3774	0.4666	0.035	1.2783	0.7309	0.07	0.1098	0.2365	0.0692	0.2763	0.6516	0.2515	0.2891	0.2254	0.2673	0.1616	0.2522	0.5193	0.232	1.5336	0.3496	0.1528	0.3322	0.084
GRIK2	0.3156	5.0511	0.0905	0.045	0	0.208	0.3689	0.1148	0.0162	0.368	0.1233	0.0454	0.1062	0.027	3.1096	0.1235	2.0384	4.3364	1.8313	2.3027	4.3263	0.0292	0.3957	0.4602	0.6439	0.4705	0	0.4953	0.6549	0	0.043	0.0202	0.0831	5.6667	0.0369	0.0077	0	1.1955	0.8021	0.1761	1.5969	0.1178	1.146	0.2662	0.0259	0.2794	0.3355	0	3.5706
ARHGEF3	9.6298	8.3425	1.4459	1.7301	5.8283	2.2491	5.9562	0.855	9.5497	3.6608	11.7693	17.5502	25.8844	12.9887	10.3893	0.9181	9.7586	5.5595	8.5294	2.4045	5.051	2.9127	7.6344	5.6417	10.8165	5.7432	18.9424	7.4529	21.129	5.084	5.3039	3.0105	12.706	8.4841	4.4075	4.9607	6.2815	2.1949	8.5292	1.0332	3.1603	1.7796	5.9225	11.4768	4.6537	0.933	20.8382	1.0706	7.7397
KLF9	17.6467	24.7977	1.2653	1.4781	31.1085	1.923	8.1339	5.3326	65.3435	39.3577	26.1546	11.9103	20.4449	19.0745	25.5125	1.7028	84.8732	24.5841	154.845	1.1897	4.1241	5.838	11.5691	37.4051	3.7934	6.6858	21.4334	0.891	22.5564	5.9338	16.6789	12.9757	4.2858	120.753	3.417	2.6206	10.7521	8.1694	61.4538	0.4047	13.6165	6.613	10.5738	5.3032	8.0171	14.4385	26.9732	1.7564	16.8551
PCSK1	0.4563	0.9275	0.6698	0.0424	0.5943	0.2258	0.1296	0.0517	94.6554	0.2587	1.5863	2.5879	0.2201	25.8932	1.261	0.0762	0.6475	0.2739	1.2049	0.0784	0.1904	0.0345	0.6046	0.5677	0.2136	7.7084	2.1105	0.0797	0.4632	0.0587	0.1912	0.3396	0.164	132.031	0.7979	0.1368	0.176	38.1282	0.7772	0.0261	6.1528	0.1285	0.1939	1.2948	0.1227	0.0064	0.1788	0.2283	0.0874
SULF2	7.493	10.6706	23.7825	15.0889	4.9885	16.0145	25.1211	6.5185	8.596	20.3278	14.2067	10.548	47.2499	8.2316	14.5529	18.6419	9.6607	12.2883	3.6941	5.9801	4.6941	19.1611	6.2263	8.2641	7.1409	9.2585	1.9596	3.0911	20.8892	22.828	3.0171	9.7977	11.9164	110.548	26.5718	9.0482	5.2701	99.2895	11.1093	2.6844	5.1788	5.3254	29.7883	55.1456	32.1119	3.2106	4.7485	7.9339	9.9743
DEPTOR	2.5258	3.0495	0.8195	2.3319	10.9779	2.1557	3.8312	4.8831	29.6619	2.8325	6.1203	9.1383	3.2494	89.724	3.6167	1.9411	9.1638	21.9137	41.523	1.6779	6.0446	3.8394	5.5675	0.8419	4.5071	1.7898	9.0913	3.9003	2.8554	7.5003	4.2451	3.2588	8.1083	33.6548	1.1367	6.0229	10.3392	6.5836	28.548	1.9132	3.0675	9.1901	8.8458	4.5634	9.1788	4.7881	6.9078	0.8052	27.6138
FRAT2	13.9449	19.3228	15.586	11.4671	9.5045	12.7789	10.0802	6.915	12.2823	27.148	7.8573	10.025	12.5746	5.6908	20.1184	15.4375	14.074	19.1315	13.5565	11.9374	7.9919	22.5839	17.1567	10.5727	7.5298	10.0015	11.7739	15.6774	12.2482	13.3763	11.3642	21.637	18.2666	30.8533	12.9011	13.0769	12.3746	8.6632	10.1506	2.0215	13.7567	11.1199	14.7669	17.8277	10.7799	4.3201	17.1351	2.2498	32.4337
FOXO4	25.9383	37.7527	17.6796	7.1411	28.5429	7.3695	16.6398	10.4362	31.0427	20.6724	17.7755	28.0759	16.3437	4.7959	20.7652	16.4688	20.5565	67.6161	30.4332	17.5556	30.5391	7.7273	32.0745	18.6295	21.0788	13.9834	37.7033	30.4815	28.0893	14.1029	26.6472	20.541	29.8101	21.5022	17.226	13.5073	34.2025	15.7294	22.0305	5.0465	25.9623	28.8922	19.7471	17.0089	18.9023	6.7275	44.0474	2.4505	89.8509
CHI3L2	0.3886	14.6183	0.3675	6.8564	0.5115	0.7676	4.1981	0.5047	2.0809	0.0221	1.0575	9.9449	39.4046	4.3773	11.484	2.4514	1.4317	18.0054	1.1361	0.5945	1.658	0.5757	1.3209	0.1175	1.5629	1.3494	2.2333	0.0777	3.6599	0.2863	0.2245	1.1367	2.9823	1.5362	0.0711	0.8714	0.7155	0.5314	4.9311	0.1695	0.3494	0.1045	0.8077	13.7292	0.0499	0.5173	1.9381	0.341	0.6747
GNG7	30.1774	40.3859	27.4269	9.8108	39.5597	44.9912	31.8569	14.8755	125.765	2.1503	22.525	88.0563	31.7358	327.818	34.2132	25.2614	31.1322	35.3435	505.682	41.2611	21.9995	22.7971	38.8194	4.8041	39.0875	59.0429	165.098	34.6158	129.428	98.0954	45.3703	44.3956	33.3784	22.442	25.6959	63.8171	31.9376	34.4374	26.5963	35.9001	87.1655	155.687	81.559	38.7264	47.8638	18.1009	30.0264	5.0384	60.4443
TRIM2	11.6566	72.9481	1.2788	0.6601	11.049	2.9997	5.0672	0.347	7.2216	14.8124	18.9743	24.3166	29.0063	7.0683	22.6994	1.629	26.2894	72.9842	43.9262	3.191	26.3075	6.5617	17.3881	26.4696	12.1972	5.6742	19.6654	13.1267	53.6022	14.1912	31.6355	4.1872	7.647	19.0664	3.1475	11.1335	9.9413	5.2237	38.4948	1.5337	9.8234	11.92	26.3358	72.1715	13.5354	1.7945	17.545	0.8159	27.5338
UST	4.9571	20.7671	1.3747	1.567	12.4177	1.8889	6.548	3.201	3.322	4.6973	10.7402	7.3461	9.739	10.9089	15.4444	3.2814	7.6212	5.5411	9.0291	3.224	1.6034	3.1409	9.0786	3.3895	4.9259	14.3509	11.9595	5.937	7.312	6.274	8.6733	6.0209	4.6642	7.9832	3.0836	2.614	2.3087	5.8157	7.03	0.919	4.4872	8.3855	3.5386	3.4588	3.8957	1.0238	17.1549	0.3604	18.2207
DDR1	100.118	65.243	70.1412	32.5229	47.0322	14.3872	73.0428	51.9236	248.82	58.4351	48.0719	96.5434	21.5534	224.946	118.413	24.1721	51.7619	59.1903	34.4023	101.824	36.3482	16.1185	69.6995	86.6449	15.9764	39.0495	106.45	82.3609	30.7292	151.002	0.5863	80.8388	72.4351	37.2085	51.9095	53.8164	43.1534	22.3725	37.8236	12.713	78.3504	28.3851	20.4579	33.458	26.1453	33.0933	58.0585	5.9603	25.9798
BFSP1	7.6661	23.1478	0.785	1.2596	2.648	0.3914	1.6914	0.7752	18.249	4.8691	9.0313	3.2936	18.8916	27.4214	5.7673	1.3191	8.1498	16.2242	21.1576	16.666	5.6397	1.8803	7.1162	6.7575	0.8748	3.0169	6.41	3.5461	15.1656	7.7414	5.0129	0.746	0.9934	2.7361	0.66	1.1779	2.2801	9.9697	4.597	0.4832	4.0261	1.1231	1.1553	1.6327	10.8087	4.0043	2.1785	0.5196	6.3343
BCHE	32.1334	0.6437	3.1973	2.0469	44.3376	3.8122	29.1795	18.1466	2.7326	5.7467	203.241	58.4527	77.2543	13.5441	48.4303	0.3054	79.3803	53.1234	614.794	26.3048	8.6545	44.8202	11.5814	72.1545	10.3449	49.3926	38.9589	51.3918	0.3193	63.3192	79.9195	19.9078	0.1787	65.8344	8.5199	0.0398	6.4315	27.3711	60.9093	11.937	38.8742	112.601	62.5648	1.1044	18.2122	23.2242	0.1386	3.0125	219.855
COL6A1	184.102	196.471	1804.08	179.714	311.3	356.44	226.211	297.254	845.667	121.354	245.594	96.4363	185.922	660.973	235.635	170.608	252.253	244.341	111.516	165.616	93.3441	106.749	183.349	157.084	112.547	47.3821	210.66	78.7767	141.118	176.732	27.1364	116.702	158.306	95.9415	92.8404	216.349	65.0449	130.974	169.668	31.6316	92.544	208.502	212.587	56.4442	193.872	121.985	142.455	73.5583	132.06
PCDH7	31.6702	9.9468	0.6847	3.8793	23.6714	1.782	0.5829	3.701	13.4345	20.6659	38.6246	36.1054	16.3812	54.5154	44.213	4.3896	52.7696	33.7558	224.988	12.8401	12.369	14.693	29.4795	12.6072	16.925	0.6676	11.4584	11.5087	63.8485	21.2278	19.3189	0.1005	1.6583	4.3757	0.4207	7.7752	29.9311	0.6519	57.1521	2.3441	4.2144	64.753	35.0544	3.3916	15.7148	6.9238	1.1035	0.0405	85.0078
TGFB3	2.3736	6.7565	4.3021	2.4389	9.5014	7.1055	4.6228	3.3657	3.6929	4.3438	7.0228	2.5164	5.5696	21.0756	6.288	4.0459	1.4744	6.8873	11.1962	1.219	1.8409	3.2066	1.7248	3.4722	8.6211	2.8572	4.2268	4.7245	9.6334	4.5951	3.3008	2.9811	6.9266	2.1105	2.4663	2.9708	2.0765	2.5019	9.7312	0.2762	2.7029	5.6955	5.1078	2.3963	8.3603	0.9137	1.3551	4.436	5.8692
AKR1C2	0.018	2.056	0.3887	4.9816	0.657	2.4763	1.105	0.098	0.2777	0.0226	0.0946	1.4955	0	0.0498	0.1105	0.1642	0.8161	0.9355	0.7692	0.9313	0.7666	0.2721	0.1567	1.1724	0.0681	0.3401	0.2485	0.3304	0.0357	0.0973	0.2202	0.4058	0.102	0.0522	0.0725	1.579	0.0219	0	0.1163	0.0576	0.1594	0.1142	0	2.3339	1.7675	0.0897	0.0577	0.087	0.2535
LAMA4	33.6555	53.1313	13.2308	2.6724	110.925	7.6119	8.9204	8.313	124.402	33.2271	12.0145	7.5226	41.4568	518.188	107.553	9.2907	11.579	74.6957	127.382	19.4484	21.3907	11.9381	19.8499	22.4059	12.4448	31.2232	12.7399	22.5449	85.7209	36.9696	16.7374	4.2642	12.1268	30.0097	6.665	32.4844	5.1668	9.1979	26.583	3.4253	15.0728	45.6739	16.0664	9.5512	68.2961	4.5969	20.584	7.9464	38.8217
SLC6A10P	0.026	15.2142	0	0	0	0	0.0111	0.0088	0	0.0163	0.0546	0	0.0502	2.071	7.6022	0.0546	0.031	0.0131	0	0.0312	0.0813	0.0103	5.9207	0.037	0	0.0456	0.0448	12.5627	0.0129	0	0	0	0	0.0502	0.0261	0	0.0211	0.0191	0.0129	0	0.0406	0.022	0.1159	0.0673	0	0	0.0119	0	0
HBP1	25.322	58.9026	2.5239	1.7933	15.5662	1.8807	20.3585	4.2626	29.7271	11.476	30.1139	39.7424	27.6808	37.8132	27.5292	3.0545	28.6186	28.2588	40.2388	13.5869	7.7043	5.1123	21.3476	25.7365	10.5738	11.979	30.8868	8.6811	28.7596	25.6559	25.507	6.1737	30.2701	33.5195	7.2638	8.9746	30.7723	4.9745	52.5634	1.5404	18.2322	15.2687	21.1695	19.2175	7.6535	6.609	45.8933	1.4067	68.0361
CTSF	132.53	155.019	136.217	17.0569	60.1157	113.999	96.3116	78.9803	247.484	51.5577	66.2557	166.318	25.5349	77.7455	178.99	275.254	80.5929	58.8617	46.8934	84.7997	38.623	31.0327	96.8464	131.036	17.3929	82.234	488.774	83.2542	28.8981	106.827	45.3412	91.5976	232.81	115.831	89.0354	70.3769	796.098	67.4176	124.477	36.2848	165.255	39.1484	125.207	83.1505	86.8347	56.9432	355.795	7.1486	318.032
PCDH18	1.5234	3.8524	0.9391	0.2327	1.8486	1.398	1.8019	0.5626	0.3546	0.9492	5.2027	0.754	2.335	2.053	3.3678	0.2624	0.3632	2.0362	0.8495	0.1988	0.3813	1.0449	0.9008	4.2506	0.9282	0.8637	0.2301	3.1033	2.054	4.1382	0.7744	1.5845	1.4123	5.1732	0.4291	0.7949	1.4952	0.8942	2.7242	0.2506	0.7793	2.7137	2.2815	4.7249	1.2411	0.2345	0.199	0.3559	1.2862
IGFBP5	12.9892	207.594	6.4923	48.0627	173.181	110.847	18.6402	11.2238	44.2498	167.201	55.943	65.399	409.862	2387.65	42.757	28.6689	22.9715	33.6428	40.0885	2.9864	6.0606	19.7986	135.828	20.0348	17.2292	23.83	12.343	4.3841	1268.25	18.9477	29.8831	31.5025	22.652	9.9766	8.2405	14.474	5.8633	17.0393	28.5088	9.6368	11.7693	57.9605	31.3207	7.1828	120.991	7.312	5.3085	14.982	19.7688
ZCCHC24	85.3572	65.6683	8.5115	3.7241	43.4655	7.2321	18.6217	8.5256	135.321	45.5504	38.7293	43.9417	39.3375	366.213	58.3143	13.4071	93.0555	23.0637	21.2635	48.3981	13.0299	4.9309	44.1023	33.9102	39.5427	31.0808	43.0176	24.6782	154.746	18.7684	20.9421	9.3168	49.3082	77.6659	8.7922	51.8435	5.8943	12.0972	103.961	2.0281	25.3736	107.515	19.7122	47.7798	11.2297	5.1928	42.9379	2.1279	130.99
YPEL2	9.7196	11.2407	0.7474	0.5625	3.3647	0.9099	2.8832	1.3242	6.4073	4.1753	9.8927	5.387	7.6741	18.4684	14.5931	1.1112	3.3966	7.5469	4.7773	2.3238	3.6248	1.7015	6.3923	5.4839	3.7283	1.9148	4.5363	5.0145	18.8933	4.5771	2.9557	1.2237	4.0506	3.8589	1.642	5.1815	7.5872	2.8957	20.0362	0.2086	4.1294	6.0184	9.3997	4.064	2.2755	2.6522	12.587	0.5926	12.8957
MEF2C	5.095	7.0306	1.2057	0.9237	6.1068	3.2881	6.8622	0.5221	4.143	2.9602	15.2275	30.9038	6.7075	6.4907	17.8565	0.8815	20.9042	12.4703	16.6208	2.2736	4.666	7.7025	8.2619	3.2878	4.3847	2.2173	11.5643	4.0894	6.9997	16.6367	16.9071	4.2968	3.9697	3.4831	2.2266	2.0268	18.1397	1.5512	23.6651	3.1908	4.1235	5.7598	13.7993	4.5988	0.615	3.3986	4.165	1.2287	33.7122
MAF	27.4928	38.7278	12.4444	16.7366	6.8585	10.2594	29.9573	2.1609	28.1262	21.7735	61.7625	27.1481	49.3863	22.1091	31.8267	3.1708	62.4274	56.5693	14.1005	14.8045	17.8068	11.9185	43.2406	15.523	6.9618	4.3592	16.2969	10.8332	101.964	5.1511	22.242	6.5897	36.9987	52.3439	5.8059	17.8493	12.9424	16.4067	27.0978	2.8989	41.4923	13.3059	15.8218	32.9852	11.0339	2.0407	10.6828	2.092	40.9984
CHST1	0.6861	1.3474	4.5753	1.0837	1.7525	1.2608	1.5088	0.7297	33.5372	0.4534	4.0354	0.6817	0.674	105.064	2.4953	2.5617	0.3271	0.7294	0.6917	1.1546	1.5767	1.765	2.1367	0.8413	2.8017	0.7338	1.0896	0.9882	1.1995	0.9658	0.6707	0.9059	1.6825	0.6147	0.5647	1.6889	0.8489	1.3637	1.3508	0.4388	2.8568	0.4742	0.6121	2.1168	0.537	0.2338	1.0493	1.2467	0.7147
[truncated: 48 more columns]

## Sheet: Tab 4-CYR61 High vs. Low
gene	edef6762-dd96-4284-81e6-2e128af287fa.rna_seq.augmented_star_gene_counts.csv	959c268c-637f-4f39-a254-a505c57e8448.rna_seq.augmented_star_gene_counts.csv	a88a1582-88b8-4e7e-9baf-09279b49a492.rna_seq.augmented_star_gene_counts.csv	7688db2f-f816-443c-98d8-f8077ba0e74f.rna_seq.augmented_star_gene_counts.csv	733aa64f-0d61-4f6a-8353-0299d4678704.rna_seq.augmented_star_gene_counts.csv	9a38d0dc-6b2c-439d-b10e-efd0f1cba209.rna_seq.augmented_star_gene_counts.csv	66290e22-72a1-4af2-93a6-e4859f91a7ef.rna_seq.augmented_star_gene_counts.csv	62b39052-bdb9-4ba6-9eb0-f117480c98a8.rna_seq.augmented_star_gene_counts.csv	aeac6db7-09bd-45f9-a5fd-c8358f86bff8.rna_seq.augmented_star_gene_counts.csv	4f0c3ed0-647a-422e-b771-f201f5d5d29e.rna_seq.augmented_star_gene_counts.csv	b1f01324-d0ca-4779-9ae0-5348e2613084.rna_seq.augmented_star_gene_counts.csv	b02373ab-6860-4066-aebe-2c8a4cdffeda.rna_seq.augmented_star_gene_counts.csv	289b3dee-bd46-4286-8e7b-86ffb573d37e.rna_seq.augmented_star_gene_counts.csv	79cf2255-57c7-4f54-8f0b-1e0f4a8cc8b5.rna_seq.augmented_star_gene_counts.csv	5ed0377f-26aa-4b4c-bb59-03001895aecd.rna_seq.augmented_star_gene_counts.csv	8c7c9bb7-76e0-480c-a0de-bbf48fa398f4.rna_seq.augmented_star_gene_counts.csv	e7c14078-b85e-40b8-9f56-9474543905eb.rna_seq.augmented_star_gene_counts.csv	85d43afd-9aac-48ca-a9c4-00357b7207e1.rna_seq.augmented_star_gene_counts.csv	486430aa-f745-4353-9e03-6226ac8d9993.rna_seq.augmented_star_gene_counts.csv	ef86558c-8a25-4bde-b139-ecf98e04ef0e.rna_seq.augmented_star_gene_counts.csv	fef239bb-8093-42aa-b61a-7c55ff514836.rna_seq.augmented_star_gene_counts.csv	b95ca895-419a-45de-8f20-9954a2447d6e.rna_seq.augmented_star_gene_counts.csv	cc1c7e4b-89a0-4d94-b9e5-293c2eacadd9.rna_seq.augmented_star_gene_counts.csv	a7bda5b9-9c95-4f90-bab6-10ab15ee2b48.rna_seq.augmented_star_gene_counts.csv	28541e4e-2e2b-4772-9566-acf35b31a581.rna_seq.augmented_star_gene_counts.csv	1268327c-805e-4f52-b9ab-451f17e3d129.rna_seq.augmented_star_gene_counts.csv	9cde93c5-569a-482a-901b-2bbc21aadfa2.rna_seq.augmented_star_gene_counts.csv	84ca3236-683a-40f6-b8a6-600ffd43a0da.rna_seq.augmented_star_gene_counts.csv	530f723a-ac5b-4e14-93b9-1d501b92fddd.rna_seq.augmented_star_gene_counts.csv	4e64826b-fffb-4430-bc34-ea6086e89a0a.rna_seq.augmented_star_gene_counts.csv	b2b4cc41-5760-4463-bcde-16115ceb12c2.rna_seq.augmented_star_gene_counts.csv	48155bad-7de9-401d-a495-972cbbb8f276.rna_seq.augmented_star_gene_counts.csv	ccfdc2a2-bb01-41c2-9ef1-98bbd1cfae22.rna_seq.augmented_star_gene_counts.csv	dfc53815-0784-48c7-84aa-f23d087a13df.rna_seq.augmented_star_gene_counts.csv	3bb03dc9-6daf-42ef-95d6-cdf726f926e8.rna_seq.augmented_star_gene_counts.csv	c7d31245-5d71-4a23-8a33-4f83c4718e20.rna_seq.augmented_star_gene_counts.csv	6ca5eb09-d104-4305-b3ec-4d6e8a0c2850.rna_seq.augmented_star_gene_counts.csv	f8676f25-4b49-44b3-b953-c457c3be5a3b.rna_seq.augmented_star_gene_counts.csv	264656b8-d45c-4f5c-a431-366c566296fe.rna_seq.augmented_star_gene_counts.csv	ae8e545c-f6ab-40e2-8122-162eab4b2724.rna_seq.augmented_star_gene_counts.csv	04e3aeba-c9bd-483d-9484-5ecc0e64a054.rna_seq.augmented_star_gene_counts.csv	aad89bba-d9dc-4a93-8e77-26f2c1ba1c3f.rna_seq.augmented_star_gene_counts.csv	a270eff7-ab2e-4b43-bf02-8995026372f0.rna_seq.augmented_star_gene_counts.csv	bc467b80-495a-43d8-837a-4385aa178307.rna_seq.augmented_star_gene_counts.csv	4e24bc58-d246-4c96-952a-a18f95d142b2.rna_seq.augmented_star_gene_counts.csv	20679021-a108-4728-ab9a-fa3ca2fed0d0.rna_seq.augmented_star_gene_counts.csv	399e5b76-1d8d-4db9-a186-ffdc2f6e0884.rna_seq.augmented_star_gene_counts.csv	08e3d239-3d8a-4eee-9e08-ac2bcb3f2619.rna_seq.augmented_star_gene_counts.csv	8ad884fa-e426-4bc0-960d-08db42d341da.rna_seq.augmented_star_gene_counts.csv
CYR61	11.6568	11.641	11.3459	11.3124	11.1548	10.9035	10.4552	10.2766	10.1767	9.856	9.6527	9.6506	9.5665	9.5357	9.5324	9.32	9.229	9.1381	8.9786	8.8927	8.709	8.6384	8.5977	8.5255	8.2895	8.2588	8.0454	7.5691	7.5103	7.3274	6.9659	6.9021	6.7421	6.739	6.5039	6.3695	5.9039	5.8471	5.6207	5.3854	5.2717	4.8072	4.2603	4.2127	4.0155	3.7949	2.4874	1.9573	1.0948
YAP1	5.1857	130.587	77.2787	36.9283	84.0379	66.8815	70.3625	83.0112	13.6839	53.0314	4.6154	30.9706	41.0122	33.8616	16.1921	45.3734	11.7944	8.1261	34.9366	37.6743	23.251	47.0412	6.5317	114.296	55.9334	59.1794	28.3136	33.3849	27.733	5.9671	43.1831	75.9914	51.0466	36.2265	63.0262	4.3912	91.3351	68.554	22.651	59.2061	52.1391	20.6276	32.0523	40.0405	43.233	61.7654	25.59	6.9025	4.7709
WWTR1	9.5064	66.4132	39.8166	14.1472	35.0119	52.8938	32.3284	53.7597	11.9986	131.597	2.3785	40.3933	35.313	289.082	19.0491	56.4327	13.542	12.7314	23.5525	48.5113	41.08	79.6542	7.0309	383.408	35.4662	38.385	41.3718	98.7188	11.1165	3.4183	29.9848	223.519	24.7066	39.1275	64.8616	5.5826	4.4823	66.894	9.7223	67.1685	31.3782	20.7994	116.939	30.1277	50.4355	317.518	20.2368	7.704	3.248
ABL2	6.6273	48.4759	56.0227	12.7821	12.4169	30.3097	42.313	69.3009	22.2782	13.9201	5.2653	20.868	6.251	15.7111	18.3488	86.5291	8.346	29.6935	14.0791	93.6932	29.8571	26.0254	18.2231	25.3649	38.4574	21.3094	22.764	21.2325	21.4456	14.774	64.8644	6.6568	61.8088	75.951	24.2079	5.6271	7.8294	8.903	4.5043	54.1016	46.7536	14.693	79.3582	5.4646	41.0058	8.4281	23.1759	9.7457	8.9843
ADRB2	6.8469	3.2714	2.8094	1.2039	2.1048	0.5403	6.1128	0.9606	4.9635	1.0496	11.8758	0.2392	1.4847	2.0448	2.4739	0.8123	0.236	1.3555	0.1806	1.4168	2.1525	0.9191	4.8285	1.9444	6.3064	1.3546	2.4487	0.409	3.5403	1.7731	0.3268	0.731	1.0604	0.6878	0.4395	0.3048	5.3877	1.2505	0.3061	2.8992	2.2402	1.8815	0.6462	2.1604	1.3679	1.0505	2.0975	0.1806	0.0694
ANKRD1	0	0.0341	0	0.0322	0.0272	0	0.1503	0	0.0246	0.2656	0.1367	0.1793	0.3495	0.1422	0	0.1054	0	0.2345	0.0338	0.0325	0.1084	0	0	0.03	0.2288	0	0.0328	0.1314	0.1171	0.9766	0.1131	0.0632	0.1431	0.1031	0.0309	0	0	0.0361	0	0.0815	0.0388	0.0683	0.0404	0	0.0275	0.1432	0.1685	0	0.13
AOX1	0.9855	0.6537	2.4093	0.9066	5.1583	0.4739	1.5785	0.2642	1.5703	3.3685	0.2865	0.356	0.9764	0.6589	6.4798	0.3255	0.1976	0.5302	0.8288	1.0005	0.9324	1.4021	0.0108	0.7334	0.3244	0.6965	0.5857	5.2825	1.0848	0.4982	0.4958	2.563	0.1578	0.1024	0.5928	0.1449	6.6156	0.513	0.4252	0.0809	0.3334	0.9146	0.4943	0.204	0.7089	0.154	1.1149	0.2322	0.0086
CTGF	124.768	62.8787	40.545	17.2758	85.7177	66.9901	151.047	35.7453	18.4686	123.244	21.8807	15.3559	81.5126	96.6667	31.345	49.8194	24.8597	20.648	8.8629	29.4504	30.7033	211.464	14.6007	22.1765	3.378	25.2986	20.7571	51.434	16.0479	19.9703	19.0703	64.4615	17.4201	33.951	18.7533	5.9339	13.1702	20.65	6.5535	24.3999	21.5724	14.3709	50.9719	7.4128	8.5805	24.5304	6.6754	3.8169	9.4147
CRIM1	6.7642	9.7711	4.9341	7.2464	12.7951	20.9773	8.3982	6.1757	4.9707	39.9254	1.4534	2.7452	2.1224	18.007	9.9394	4.0054	1.2036	1.2511	1.4501	5.3	7.3477	9.1953	2.2632	33.9482	21.2761	4.426	9.4763	10.4584	4.8294	2.2744	4.5457	16.667	2.9714	13.4323	2.6694	0.4689	4.1057	3.0985	3.1472	0.873	11.5945	1.5377	3.2109	3.0893	4.5856	11.8641	3.2046	1.0047	0.4353
DDAH1	2.6214	2.4193	2.4188	3.4341	8.7169	2.6422	2.492	1.4847	6.266	10.6289	1.2985	1.1898	0.7121	1.8225	2.0117	0.9324	5.5673	0.4423	0.6604	3.5529	3.6093	0.7663	1.3659	1.4144	2.6528	1.2646	1.9318	2.1537	8.6594	0.6669	1.5667	3.4546	1.3589	1.0866	4.05	0.3418	0.8944	4.545	9.8687	1.1928	0.7108	3.0631	2.5681	5.6179	2.1546	2.808	1.167	3.9054	0.1623
DKK1	5.8226	8.7852	0.2183	0.052	0.9648	2.1338	0.0303	20.3284	0.0396	0.0713	0.551	0.9877	0.1878	0.3439	0.1539	0.6796	0	0.756	0.6002	0.7076	2.0382	29.4325	0.0791	0.2656	0.3424	3.1029	0.2114	0.1324	11.3723	1.7054	12.8288	0.051	0.692	1.3714	2.4147	0.0767	0.1062	0.1744	0.1295	4.4013	73.5615	1.0727	1.4968	0.2046	0.3321	11.7428	0.4413	1.5923	0.1676
DLC1	7.6518	95.4133	34.0574	28.4536	109.159	5.6655	26.4832	26.5624	11.2362	49.7546	8.0481	9.7442	20.9964	82.962	8.8802	33.1867	6.0933	3.9701	3.3434	26.6589	55.8702	22.4139	6.2288	122.767	41.0934	6.8746	67.6904	29.2592	24.1163	6.0406	6.7523	20.3437	5.8729	45.5436	4.408	2.3819	9.9329	106.145	13.1286	9.4651	26.2667	9.5306	8.9475	60.8819	86.8947	20.1047	2.0213	1.2555	3.1245
ELL2	5.474	9.9938	8.5095	7.7849	9.5992	9.52	7.7287	9.6757	4.7991	23.7581	1.0101	1.6335	16.2903	20.9188	10.5643	14.2013	0.596	2.4411	1.7048	16.7864	13.2562	8.624	1.491	13.6534	9.2015	10.114	6.6377	2.7797	3.7156	4.4987	3.0616	15.6136	3.0632	9.9857	10.6178	1.6737	18.8936	9.8343	0.6184	5.8397	18.2517	3.2315	8.9473	3.1049	3.5072	4.0569	6.2795	1.381	1.4207
EPHA2	11.3274	41.4647	4.7864	10.9522	94.0165	20.7311	24.1619	10.1112	51.1268	50.4241	9.6939	65.1471	32.3261	21.1712	7.4043	26.7003	22.1436	15.1721	8.9838	43.4737	10.3854	4.5869	14.253	31.0107	12.4885	19.7072	5.8668	15.0239	28.9281	1.9877	9.1661	45.62	28.6195	67.0457	18.479	11.4585	43.1234	20.294	49.2021	30.1418	7.1705	25.0346	68.6917	52.8405	66.8145	50.8342	2.3305	0.878	64.4718
FOSL1	4.148	9.7909	98.1874	8.0726	3.8714	8.1107	4.1335	66.8338	20.0136	83.5022	13.447	128.107	12.7808	5.1047	6.8307	54.6605	23.7304	5.4874	24.4669	17.1805	10.0416	297.628	28.5163	240.415	7.8746	49.1327	1.6482	3.6148	0.3332	20.6902	103.792	19.9745	86.4703	25.6305	149.873	2.6013	0.3498	1.6418	13.0831	131.596	167.318	29.104	264.95	0.86	17.2498	31.2083	17.3407	5.6224	22.0966
GADD45A	15.1154	39.6891	48.6002	19.7233	56.57	32.6096	20.5739	27.9529	28.353	360.837	5.0861	16.0933	69.3944	71.7751	30.8414	20.2238	14.0065	29.0395	20.4587	29.9334	21.1649	14.3522	15.3607	83.8669	33.0037	27.4039	19.327	10.5082	40.7784	55.018	45.4559	60.975	40.2304	24.1177	28.9807	15.0161	71.0133	90.9329	30.8137	15.3479	51.5003	8.1241	31.1979	50.984	54.636	190.777	43.7886	4.2409	34.1345
NAV3	2.9645	12.2565	0.9127	2.4466	1.6615	13.5919	4.4868	13.6962	1.7669	3.3218	0.341	0.5924	1.7326	1.1505	1.0811	9.6675	0.2535	0.959	0.4883	4.607	8.9812	3.4369	0.7408	0.6865	1.6742	3.9169	3.9378	0.3454	2.4942	2.304	5.3894	10.5662	2.405	0.7924	3.9642	0.6469	2.9973	0.6125	2.4688	3.4777	6.5468	4.8952	1.0994	2.0141	1.1739	2.5385	1.9022	0.2813	0.7886
PAWR	0.6493	4.7331	6.1988	0.2602	10.4246	0.6805	0.6998	8.5025	2.2561	2.9916	0.375	1.1926	4.9309	4.5121	1.8801	5.2965	0.8447	2.0995	0.4256	5.4519	0.3197	2.5085	3.0521	8.6775	3.9373	6.7209	1.2775	0.7803	11.9802	2.0405	0.9744	0.7117	4.621	5.7317	7.4424	0.4109	2.1962	16.8052	3.9581	4.4795	0.2948	2.3683	6.4623	4.059	0.1237	1.1504	0.837	1.6167	0.3713
SH2D5	0.67	0.0815	0.7202	0.2829	0.1194	0.8484	0.2548	0.9744	0.206	0.9536	0.0182	0.5366	0.8364	0.7187	0.4026	0.855	0.6441	2.9938	0.8507	3.8137	0.5044	0.11	1.4224	0.2748	0.1173	0.4751	0.0654	0.747	4.8583	1.2175	0.6429	0.2144	2.9495	1.1931	2.0948	0.2279	0.4834	0.0863	0.2106	4.7799	0.6648	0.5582	3.64	1.8083	0.6027	0.1	0.2689	0.6777	0.7156
SMURF2	3.8059	16.628	16.9056	14.1753	16.5693	44.2788	26.0648	31.2039	10.6424	48.7432	3.6706	4.8587	8.5469	13.0722	9.1786	17.7788	1.5644	4.0157	4.8216	11.6763	10.9383	12.6537	4.0345	102.278	16.7401	6.4474	11.0807	12.0411	9.2265	4.0091	7.8022	5.8376	10.2868	30.5318	11.5134	1.6588	4.6023	10.0491	6.9649	6.6245	11.4456	7.9612	21.8321	8.1531	4.0833	24.822	8.7908	1.3517	1.8194
TEAD4	111.32	30.3132	56.3462	23.5877	16.6978	78.8851	23.5269	40.9482	42.1584	24.9832	30.4664	49.9305	9.043	12.3853	29.5947	24.466	82.927	34.1055	39.8159	33.4384	20.8083	24.722	63.9065	20.3159	47.6752	47.0078	15.6572	41.2269	48.1869	15.4645	44.1576	27.1653	64.0288	21.665	27.5358	8.3757	37.537	3.7167	16.088	92.6705	85.1112	39.0971	53.0823	16.2347	21.5051	24.1675	27.6066	9.545	9.3481
WWC1	0.0338	2.776	0.3526	0.2003	3.8596	36.3868	1.0471	0.2335	1.2137	0.2882	0.0971	0.1168	0.1999	1.0817	2.3051	1.6219	7.2926	0.7217	0.1563	0.0981	0.603	2.147	7.3177	2.005	12.7366	1.9375	1.3154	10.2127	7.5573	0.8308	1.2901	1.7121	0.7199	0.7415	0.4552	0.896	4.0176	0.2561	3.2513	9.9273	1.0391	4.1809	0.4731	3.1225	1.824	0.3432	0.6357	1.0785	0.7385
ACAT2	5.5451	36.5526	7.9597	12.9002	13.9333	9.5677	15.2368	24.8503	11.8254	10.6485	3.2463	36.3934	31.5778	14.4718	32.802	27.9789	3.5407	17.2325	15.7041	12.3289	42.2968	89.4312	47.5258	14.9537	11.3721	39.6034	7.6494	5.526	0.9134	2.5117	21.2868	54.1068	10.2888	7.3098	22.334	1.0721	6.1646	30.3525	11.9389	28.6382	18.7701	4.5371	24.8657	33.4021	13.6386	13.428	13.7136	3.1686	2.6275
ADAMTS6	0.0397	0.2919	0.61	0.3975	0.4947	0.4626	0.1884	0.2258	0.0617	2.7567	0.0667	0.0312	0.073	0.3121	0.2166	0.0881	0.0231	0.0735	0.0424	0.4349	0.5738	0.1152	0.041	5.9596	0.0137	0.1331	0.9249	0.2884	0.3181	0.1446	0.1418	2.3589	0.0399	0.528	0.0646	0.0637	0.0661	0.211	0.0623	0.247	0.0891	0.3852	0.945	0.4017	0.2698	0.4863	0.2377	0.2431	0
ANLN	2.8847	55.6776	24.5996	38.1595	37.7466	47.1166	32.4711	50.8359	11.4058	46.9208	1.6666	41.309	6.5945	32.6202	11.9108	37.5764	7.6386	20.463	12.9827	13.3062	36.4816	26.2329	26.8112	50.6139	10.2721	26.4473	22.9758	46.3994	24.8161	4.0447	24.5913	86.5856	20.5167	23.0556	95.1007	6.332	3.1688	95.8649	18.9532	35.4714	77.092	3.1986	35.1284	16.6794	15.4225	5.0649	18.3304	4.7342	3.8489
ANXA2	235.556	631.755	638.292	85.6243	90.4775	257.389	82.4446	326.741	406.783	116.379	350.396	270.68	56.772	82.97	177.207	273.84	105.45	129.833	148.238	211.875	200.208	435.357	299.696	314.115	398.297	585.198	122.759	72.0688	128.357	87.1452	396.296	124.832	254.965	98.0331	215.93	78.5033	118.289	95.5961	30.2564	96.0501	640.567	96.0252	115.366	67.0806	58.223	304.457	142.337	63.5213	67.8943
AXL	6.0321	6.746	28.5353	22.6691	16.9422	8.0656	6.8891	6.5178	7.0902	95.2836	6.3569	3.0536	1.8953	22.2505	32.8091	5.1451	2.7377	1.8261	3.5641	8.31	16.9297	298.546	1.6195	196.718	4.0566	6.026	12.2759	146.012	4.6339	3.2206	6.6046	9.0392	6.2034	2.3911	1.9923	0.7171	3.6555	1.5715	0.6801	6.1384	8.6078	5.2712	78.9699	4.678	9.2996	133.091	13.2758	1.6931	0.3354
C12orf75	1.0742	19.7212	9.0601	2.7854	7.7402	15.6649	2.2472	4.9016	6.4561	1.2946	0.5908	0.6755	3.1487	6.2714	4.75	4.5307	1.6319	1.7666	15.2542	5.7923	4.8029	22.8999	12.8064	32.2943	15.6408	6.5725	3.2468	1.201	12.4146	7.9792	18.4169	21.1835	7.229	10.6249	2.2174	1.6075	0.9806	4.3381	5.7201	17.4451	32.5626	6.5785	10.1709	3.278	1.8989	6.1392	6.0474	1.4605	0.7085
CEP55	1.396	22.5668	19.9828	30.3321	13.2299	30.075	20.1661	30.7081	18.2697	11.3959	1.6859	55.1962	14.8678	9.3482	14.6575	7.2429	4.319	15.8168	14.213	12.1501	32.6595	15.572	14.0022	17.6935	17.4383	43.5533	12.8919	8.6659	19.8717	9.141	26.527	26.6549	10.7411	8.8625	32.5593	5.5621	4.6854	7.4724	6.2534	26.8658	32.8645	7.722	41.5038	8.5995	3.8547	2.9597	35.5331	8.2152	3.1109
CLDN1	41.0543	2.0168	0.5938	124.897	23.5455	2.5697	6.8575	1.0197	43.5669	66.8867	10.2663	0.1475	0.1533	0.2222	0.3095	3.3457	0.4583	7.0195	0.0501	358.095	17.7719	2.4307	0.1775	0.4877	0.0967	30.338	0.3882	9.5952	0.4911	0.0201	5.5101	272.146	7.3899	12.5169	51.4498	0.0658	0.2729	211.425	139.288	6.5751	4.4555	2.0038	0.5578	0.2684	124.185	1.8899	0.1455	1.0021	0
CNN3	32.4664	1006.95	274.624	420.308	138.878	120.373	208.415	266.943	82.5435	139.202	51.6279	74.5961	78.0438	11.2071	107.419	202.216	60.8756	31.2235	49.5513	391.114	241.649	293.988	101.2	245.78	347.013	206.637	191.06	195.067	188.068	6.6742	222.493	167.079	30.9568	523.913	328.781	57.2491	92.5636	476.004	75.7201	127.761	355.28	46.7114	185.672	11.1954	288.358	136.036	66.9436	5.4393	43.0246
COL12A1	2.1083	236.402	38.7934	3.8689	13.5497	66.4251	42.2254	92.0381	3.6953	25.3257	1.5458	8.7183	0.6347	2.9507	3.4536	7.9857	8.5795	12.7059	3.286	18.3102	7.3514	27.6754	2.5189	63.3039	4.2787	19.4616	4.5411	1.6629	5.5412	2.2349	11.4775	126.713	9.0699	15.7862	11.175	0.598	0.7102	5.3206	5.4461	3.1324	17.0786	7.2037	3.74	3.1667	6.255	43.3004	4.995	1.1306	0.3467
CPA4	0.0573	0.2927	26.7941	0.2624	3.0146	1.1777	1.7498	0.4248	0.1112	3.7368	0.2371	0.2163	0.2283	0.2788	0.1604	0.5879	0.14	3.005	0.2602	0.0441	0.9967	2.3839	0.0888	2.6823	0.2365	10.6975	0.1038	0.104	0.2118	2.2084	0.1407	0.3861	0.1294	0.6996	2.5424	0.0258	0.274	0.0489	0.7784	0.0369	2.9447	0.9106	0.8034	0.0328	0.0994	0.1943	1.1239	0.0585	0.0235
CYTH3	54.483	200.394	176.669	156.87	103.693	215.212	338.589	451.233	54.9213	135.848	19.8638	303.824	66.3196	89.4575	46.3692	557.374	113.57	170.103	105.322	199.154	154.94	355.194	82.8594	138.864	190.683	261.231	89.9025	164.736	67.9747	29.422	174.011	343.114	282.365	94.4605	419.342	74.4897	22.0752	112.042	89.6455	226.336	164.995	113.08	106.587	63.2115	207.948	55.6843	98.9835	27.9469	27.4585
DIAPH3	0.2458	9.9932	6.1644	8.0499	15.5083	4.5248	1.949	10.2377	3.2313	4.2284	0.5747	8.4066	1.8075	1.3392	2.3675	2.1382	1.7	1.2888	2.5358	1.7265	11.6587	5.7301	2.9344	5.011	3.4865	10.899	5.7387	6.539	6.6718	0.5624	4.7504	4.9979	6.8812	4.2505	12.409	1.0619	1.1049	8.6112	14.4437	4.1598	13.0332	1.2742	7.782	6.3477	3.4631	1.163	3.1453	0.5148	0.4601
EPAS1	118.947	43.5965	48.645	44.5638	50.3384	55.4197	113.768	18.1969	26.5568	131.929	35.1439	19.9976	10.4097	37.4584	117.255	58.5109	72.9404	10.8146	37.7614	45.7744	56.5545	26.9397	31.1517	57.751	42.9511	33.3748	30.9065	54.8675	39.5298	26.8343	12.4596	74.0905	42.4638	31.0154	15.6596	5.3204	48.6872	28.0896	5.8538	14.4979	51.8202	15.1655	17.0191	19.96	30.0509	17.7801	37.8274	9.0074	9.7081
EPB41L4B	0.5471	0.2709	0.0205	0.1758	1.8915	2.3961	0.1963	0.0747	0.0056	0.0737	0.0155	0.0204	0.0176	0.7756	1.0348	0.0878	0.1206	0.3641	0.0077	0.0443	0.238	0.0078	0.2304	0.1089	0.0148	0.7362	0.3798	0.3358	0.3857	0.037	0.0899	1.178	0.1626	0.0937	0.5754	0.0519	2.6513	0.1556	0.5996	1.3796	0.2994	0.4032	0.2935	0.1483	1.0484	0.0163	0.0096	0.1258	0.0059
EPG5	6.9237	33.3386	33.3558	22.5047	20.1795	11.3111	45.8393	18.0707	8.6236	14.3539	3.5744	54.6277	9.9673	7.8286	20.5181	36.6181	14.3289	18.0795	13.3932	16.6599	17.1026	14.6156	10.5549	9.0209	40.2946	79.1392	7.5778	6.7369	8.7324	10.8385	15.0979	8.4047	62.7292	15.7843	43.6886	5.1416	7.0508	14.5355	6.8722	18.7821	16.9322	9.8641	22.6388	8.9825	7.3343	7.7429	17.7041	2.6696	4.8197
ESM1	0.611	2.9219	3.0011	17.8976	0.9588	2.0202	0.2997	3.2481	1.586	30.7475	0.2425	2.5043	2.5818	6.3368	3.8812	13.3869	0.7648	0.2339	4.4114	2.681	1.3693	1.4661	15.095	89.1708	1.6516	1.8786	3.3352	41.8744	3.971	9.0374	0.7708	22.3056	7.0096	27.4635	4.7855	0.3672	0.543	1.1029	8.9114	3.3873	0.2319	1.2254	15.866	2.0495	7.233	99.6913	1.2323	1.4733	1.8324
ETS1	44.5488	451.849	143.364	122.634	154.785	64.5405	68.614	225.581	41.4238	27.7521	24.6802	134.875	42.7477	15.6585	97.19	54.2978	44.2724	18.4574	24.3154	128.441	100.339	48.0485	44.3018	17.2352	293.111	98.9784	50.7446	111.29	67.8171	11.707	163.189	65.3896	127.999	109.006	89.9927	11.1479	77.3243	97.8421	33.4242	133.216	152.309	44.4518	52.0918	101.465	92.8993	11.079	55.7694	6.8794	14.8416
F3	0.3931	1.4367	1.1384	2.4792	4.8094	2.2882	10.5544	1.981	1.5557	7.6872	0.7492	1.0197	1.8544	4.6904	0.9474	2.0267	1.7697	7.2485	0.5249	1.9159	4.2576	1.9873	0.3855	5.9452	0.223	4.5181	2.684	0.4075	0.3268	1.0348	2.4726	3.5886	1.8343	0.3518	5.575	0.2717	0.8333	32.9658	0.7686	1.2133	4.7837	1.3124	3.5308	0.4723	0.6304	1.8873	0.5486	1.2139	0.0161
FJX1	1.2966	15.0283	16.185	4.2928	2.8743	11.8182	1.1738	26.2784	1.8294	11.2187	1.2378	6.9606	7.8284	15.7675	4.0991	20.4154	11.7494	1.9192	5.2128	10.2087	2.6072	7.792	4.5996	18.6972	11.2334	7.6244	7.9023	4.4481	2.3958	2.5128	8.0983	9.6912	20.796	13.2349	10.2951	7.0413	0.9015	1.0999	3.6195	28.1067	24.5382	10.8925	7.299	8.4443	12.037	13.7163	1.8489	3.8876	0.8317
FSTL3	5.0305	8.524	100.99	25.0552	11.8985	209.863	5.875	59.8213	9.6652	14.4029	66.5662	15.4712	9.3724	9.9056	62.6838	125.33	78.8459	19.9765	56.4142	138.553	11.578	6.1608	21.2166	52.6988	55.3185	45.5908	16.6005	28.0736	30.3735	26.9698	21.1412	12.0914	68.8592	32.2576	5.086	12.8909	19.0919	5.1713	11.4308	26.0725	56.2464	17.3016	40.3403	15.4732	25.0308	98.0117	11.9321	11.9543	8.1473
GADD45B	22.1519	17.5396	24.7133	40.5365	14.8976	21.8753	22.5499	9.5167	52.7037	38.0725	12.3454	15.5161	58.4824	16.5531	27.5861	11.8255	6.5741	12.4678	19.9225	14.374	20.7805	30.0559	8.0517	15.3481	10.1241	12.0354	22.342	16.1998	7.5981	41.9053	20.3808	11.5412	9.1055	13.8578	4.5256	5.8035	19.6072	7.8492	3.2278	4.4698	17.3926	18.2868	22.2081	13.6621	18.1225	18.1631	27.8592	14.4697	3.9179
GFRA1	0.1374	1.1367	0.3006	7.6023	7.3809	0.0245	0.8002	1.1069	0.0232	0.0278	0.2449	0.0338	0.344	0.2637	0.216	0.5432	0.0751	0.0295	0.485	0.0306	1.1238	0.1039	0.0863	16.9127	0.5915	0.2611	0.5439	0.545	0.0773	0.0844	0.3731	0.4172	0.054	0.0875	0.0233	0.639	0.1589	0.6662	0.0606	0.0384	1.0741	1.9816	0.6089	0.1504	0.0518	4.0831	0.2541	0.0766	0.0098
GNGT2	1.5448	0.5415	2.7743	4.4412	1.3264	0.414	0.9555	0.1991	3.6745	1.0008	2.3912	0.6019	3.9916	4.0952	8.1228	0.4096	0.5392	0.29	0.5381	1.6196	2.1442	2.2273	0.104	0.6667	0.1385	1.4384	1.5982	0.7659	0.8067	1.2507	0.6592	0.7037	0.1011	0.4372	0.2946	0.3027	1.7309	0.3439	0.0243	0.3023	0.8626	1.8808	0.5562	1.2682	0.6696	1.2141	3.7051	1.0958	0.1653
HBEGF	12.1596	21.5146	7.1514	22.2699	17.4773	35.571	12.5711	6.7487	4.7107	30.1387	1.7464	5.2432	6.2762	6.0175	7.0215	10.6855	8.8587	5.6158	5.2484	9.6747	13.2153	3.1763	7.8724	27.885	19.9373	5.1403	7.6149	22.538	19.1732	6.4557	11.4589	35.5088	7.5675	14.7864	4.6969	0.855	14.0359	14.0099	11.8974	13.1505	5.9399	8.7445	8.5321	13.5899	17.2012	27.0467	6.2788	1.4702	1.7743
IL11	0.0212	0.9108	0.2413	0.0862	0.1819	0.1741	0.1004	0.0942	0.0164	1.1243	0	0.1399	0.1298	0.0951	0.0912	3.9455	0.2366	0.209	0.2262	0.0435	0.4105	0.1382	0.0656	28.631	0.0437	0.1111	0.0438	0.5929	0.0391	0.272	0.3591	0.9721	1.5304	0.2413	0.289	0.0764	0	0	0.2761	1.2531	2.3574	0.1141	11.5771	0.1939	0.0184	51.3984	0.0845	0.037	0.0348
IL12A	0.029	0.1248	0.3306	0.1771	0.1744	1.3114	0.963	0.043	1.2383	2.81	0	0	0.6755	1.4109	0.1498	0.1287	0	0	0.031	0.387	0.2977	0.4732	0	1.8924	0.0299	0.0507	0.4803	0.3008	0.1072	0.149	0.1035	2.1711	0.3494	0.1416	0	0.0174	0.0724	0.033	0.6934	0.9329	0.3904	0.7187	0.3697	0.3652	0.0252	0.1967	0.0771	0	0.0238
IL7R	1.3662	1.3572	10.9957	3.2397	6.472	0.3872	4.1551	0.3771	3.9263	6.9757	0.3456	1.2088	2.667	2.2698	6.5288	0.2194	0.1052	0.2208	1.5701	3.9834	15.0826	2.602	0.0292	3.5359	0.6997	2.866	5.4588	0.2833	0.2437	0.2178	1.0929	0.4324	0.1277	0.2453	0.2755	0.0963	6.4622	7.9019	0.0341	0.1575	1.4521	5.155	0.9724	0.7871	0.0327	1.4583	4.3459	1.2243	0.0232
ITGB2	39.3048	7.0127	71.7459	114.041	25.9426	5.1575	21.5065	7.2094	48.7769	66.1719	28.0025	26.4061	66.7404	115.838	126.797	6.0064	5.568	3.1677	11.5816	64.5504	85.2325	45.6618	2.7363	12.8718	22.0497	19.0262	43.9112	22.0523	22.7643	4.9628	11.3168	17.1126	1.7775	6.302	2.4228	1.4143	24.0131	10.1201	2.3681	4.5348	7.2214	25.6576	8.6799	33.0457	8.8547	23.7328	70.2044	5.0908	1.3075
KRT80	0.156	5.1977	2.2956	0.0264	8.7717	14.1885	8.2587	0.7321	0.1412	0.4721	0.4768	0.2697	0.0159	0.0389	0.179	1.9168	0.4173	6.3327	0.0555	1.6938	0.6076	0.7348	0.0403	2.7522	0.1206	47.2731	0.4034	0.0674	0.1681	0.2337	1.9831	0.0519	1.5457	6.7257	9.6923	0.125	0.0648	0.0296	0.0377	1.1367	4.6261	1.0359	9.8865	0.0297	0.0676	0.4552	0.2073	0.1742	0.064
KRT81	0.1764	0.158	0.1675	0	30.2714	0.2014	0.1743	0	0.2282	0.1095	1.29	0	0.036	0	0.1772	0.0652	0	0.0363	0.0314	0.0302	0.3017	0.3517	0	0.0556	0.0303	0.3341	0.0304	0.061	0	0.151	0.0525	0	0	0.2392	0.0287	0.053	0	0.0335	0	2.3447	0.3596	0.4117	2.3228	0	0.0255	0	0.0782	0.1713	0
LAMC2	0.3184	1.36	0.2228	0.2301	4.6688	0.8492	1.8772	3.2165	0.0975	0.2809	0.0844	0.1265	0.2361	0.3385	0.2596	2.2017	3.7721	6.4073	0.3043	0.129	0.363	0.2095	0.0259	0.7682	0.1123	5.3607	0.182	0.1042	0	0.0108	0.3289	0.2006	2.1315	0.0273	3.7405	0.0352	0.0348	0.4767	0.1881	0.1509	3.0333	1.0467	0.6725	0.0671	0.1453	0.142	0.1002	0.3076	0
LETM2	0.2319	1.5159	2.2816	0.9815	1.4338	0.2033	2.2106	1.5539	0.3096	1.6588	0.1668	0.7526	0.5798	0.819	0.7666	2.6025	0.4533	2.117	0.773	0.8473	1.6924	0.8473	0.8523	3.2974	2.2677	1.0299	1.5069	0.3655	0.9942	0.6195	1.8376	1.1848	1.1312	2.5664	1.049	0.1673	0.3779	0.5173	0.3494	0.8114	2.1219	1.1291	2.0213	1.55	0.9007	0.9747	3.0706	0.2108	0.2588
MB21D2	2.148	10.4909	4.2202	0.9419	2.3373	1.8262	0.8562	5.38	4.3398	1.0347	1.1188	0.3494	0.885	6.1096	1.8331	3.5317	0.9048	0.3426	0.811	10.1662	2.3225	1.1678	1.644	4.1137	5.3478	5.034	2.0883	1.6702	2.8057	0.9037	1.2722	2.8639	5.4358	0.4219	1.1553	0.8903	4.7724	2.1283	1.1533	6.2399	1.1551	2.6127	10.995	5.5098	2.3116	1.0251	1.28	1.3057	0.1519
MFAP5	0.6709	6.3499	7.3402	0.2374	36.517	4.0952	4.6683	3.8698	0.6791	0.4482	3.0211	0.0688	0.6434	1.484	1.3182	0.0647	1.9547	1.3313	0	1.0177	5.0885	1.332	0.1656	0.1654	0	4.156	4.4212	0.4536	0.1617	0.5432	1.6267	6.5486	0.0878	0.2373	0.9952	0.9992	0.1334	0.1162	0.0211	0.1876	0.5708	0.6755	0.0743	0.8012	0.3034	0.3955	1.3183	2.3201	0.1915
MPP4	1.509	0.1981	1.958	0.0117	0.1484	0.7573	0.0273	0.8196	0.0447	0.5149	3.7697	0.0761	0.0282	0.1551	1.3188	0.1277	0.0241	0.0853	0.0246	0.0709	0.683	0	0.2022	0.882	0.4871	0.0101	0.1192	0.0478	0.0426	0.0296	0.185	0.2988	0.0173	0.1874	0.0786	0.1592	1.0534	0.0262	0.2169	0.0148	0.4368	0.459	0.0147	0	0.1198	0.026	0.1684	0	0.0284
MPP7	0.0276	0.1384	0.4017	0.1591	1.2951	0.5417	1.6246	0.1636	0.1356	0.0428	0	0.0434	1.1608	0.6124	0.3088	0.2346	0.0321	0.2723	0.0884	0.1604	0.4195	0.04	0.5792	0.0869	0.0664	2.452	0.2664	0.1049	0.136	0.5788	0.2216	0.156	0.2215	0.0449	0.9414	0.0166	0.6576	0.2198	0.0133	0.0355	0.5062	0.2972	0.4336	0.0632	0	0.0104	0.2201	0.075	0
NLRP3	0.7041	0.6158	2.8556	2.865	1.5472	0.3596	1.4713	0.4953	1.1113	4.7788	0.4806	3.9175	1.3307	3.2319	2.4037	1.4159	0.125	0.2797	0.4462	1.5062	4.803	3.7757	0.1355	10.4799	1.0216	1.8046	1.7038	1.0021	0.7056	0.2759	0.6389	0.4882	0.4311	0.3495	8.2243	0.3658	0.7242	0.4889	0.2333	1.8571	1.7807	0.8226	0.3497	0.6419	0.2379	1.9279	1.3801	0.1947	0.1175
NPPB	0	0	0	0	0	0	0	0.1188	0.1243	0.0746	0	0	0.0982	0	0	0	0	0	0	0	0.1827	0	0.0827	0.0757	0	0	0	0.1661	0.148	0	0	0	0.1206	0	0.1562	0.0481	0	0.0912	0	0.103	0	0	0	0	0	0	0	0	0
NUAK2	4.7001	0.9171	5.0191	4.3731	1.5942	4.1468	3.827	0.3719	6.3473	0.7321	2.2737	2.1775	6.0464	3.1535	13.275	2.2627	1.0625	1.4443	2.1084	6.797	6.7131	2.9644	2.1584	1.2175	1.0869	3.7868	2.9073	2.0116	2.3489	1.0525	3.5669	1.0014	1.6115	1.5515	2.1523	0.5026	3.8519	0.8185	0.2544	3.2484	3.969	3.2067	3.8149	1.9716	1.4355	1.096	6.8704	0.6043	0.3019
OXTR	0.0754	1.0131	0.3341	0.5241	0.5502	1.1876	0.432	0.5215	0.3023	0.9127	0.0181	0.3437	1.7553	0.4136	0.1514	0.3205	0.0439	0.0775	0.1342	0.1289	1.0029	0.123	0.6097	1.7936	0.7387	0.2746	0.858	0.5862	0.1857	0.9198	0.1009	1.2287	0.2081	0.5521	0.098	0.0755	0.0731	0.429	0.5278	0.808	1.168	0.5143	0.3682	0.2732	0.403	1.5757	0.2839	0.1904	0.0928
PCLO	1.158	1.4688	0.5392	0.0782	3.2746	0.2344	5.4148	2.0694	1.8473	3.3253	0.6617	0.0468	0.866	2.165	1.2188	2.9723	0.0052	1.0491	2.5879	1.3333	0.2064	1.251	2.7697	0.7056	0.4731	0.1539	0.2976	1.6993	0.6644	2.0667	1.5244	1.3385	0.5637	0.1533	0.1257	0.3085	0.7607	0.0762	0	1.5914	0.0303	0.5181	1.7314	0.0341	0.0172	0.056	1.6019	0.0477	0
PKD1L2	0.2648	0.1309	0.052	3.2756	0.5697	0.025	0.7504	0.9429	0.1417	4.2457	0.1204	0.1981	0.2946	0.0706	0.2122	7.3398	0.1041	0.03	0.065	0.94	4.1571	0.2184	0.1037	0.0345	0.0816	0.0825	0.296	0.0663	2.4068	18.4709	0.2091	1.4333	0.2245	1.0153	0.1661	0.1317	0.21	1.2329	0.4518	0.1135	0.1601	0.3114	1.3107	0.3796	0.029	0.0585	1.9257	0.2199	0.9488
PKP2	0.0407	0.9623	0.1391	0.149	0.552	0.3678	0.0579	0.0241	0.0379	0.0076	0.0585	0.0537	0.0199	4.3591	0.028	0.1624	0.0284	0.4517	0.1217	0.0334	0.2505	0.0177	0.5292	0	0.042	0.2205	0.1431	7.3061	0.3609	0.0105	0.138	0.0731	0.245	0.053	0.0793	0.0245	0.3315	0.2315	0.0118	0.2512	0.0796	1.3235	0.8813	0.2514	0.0212	0.0184	0.0433	0.0474	0.0067
PRKAG2	0.5973	1.6666	5.6657	0.6182	1.7077	7.9217	4.7687	2.5949	3.5128	0.5563	0.7599	2.3484	1.5951	2.5987	2.993	2.9978	0.9087	6.9977	4.9093	2.296	3.4959	0.4993	2.7981	1.4264	5.1888	4.3371	2.297	1.8256	3.2985	2.2171	0.9212	0.8165	4.7144	0.9889	4.4664	1.5439	5.0608	2.3497	0.2401	0.4752	1.3092	1.9078	2.2481	1.6201	0.5298	0.5227	3.8325	0.9537	0.3824
RAB3B	2.33	2.4476	0.8387	3.6255	2.5494	10.8511	7.0608	10.0261	0.0034	0.3513	0.1628	0.0377	0.0326	0.3287	0.0497	0.1968	0.0186	0.3504	0.0237	0.1548	0.7894	0.0048	0.0092	0.2308	0.119	0.0388	0.2525	8.7377	1.1727	0.0171	0.103	0.0974	0.0468	0.2672	0.0735	0.064	0.1254	0.9495	22.8017	0.1199	9.5324	0.0382	0.2262	0.2793	0.7964	0.0301	0.0413	0.0103	0.0036
RAPH1	0.2538	2.7806	3.0633	1.8171	1.2697	2.6739	2.0886	3.6388	0.3106	1.0499	0.0597	0.8425	0.3887	0.701	1.025	1.223	0.4122	0.1746	0.9749	2.0984	0.9627	0.6208	0.2015	1.9746	3.9162	1.0665	0.9291	0.6223	0.3607	0.1379	0.6532	1.1931	0.8596	0.5003	0.6993	0.0821	0.5924	2.116	0.1944	1.7889	1.4386	0.3101	1.5421	0.1676	1.9885	0.193	0.5774	0.1081	0.1081
RFTN1	9.3244	8.6431	10.0176	12.4017	11.8461	27.6451	12.2948	5.3595	68.308	6.978	5.1069	4.2409	7.2432	9.9925	19.3186	3.9168	2.7978	2.8314	3.4303	16.6959	22.1851	7.3062	2.0381	6.1724	5.1767	29.889	10.1269	12.0467	5.2303	5.4069	6.1974	4.4027	4.5655	2.9612	7.1417	1.208	4.756	5.1566	3.032	19.4727	13.5144	14.7951	5.5464	8.1665	6.1553	11.7035	13.3117	3.6939	0.7709
RGS7	0.022	0	0.0836	0.0448	0	0	0	0	0.0342	0	0	0	0	0.3624	0.0948	0.0244	0	0.0543	0	0.0226	0.0753	0.0479	1.5002	0	0.0454	0	0.0228	0.0228	0	0	0	0.0439	0	0	0.0215	0	0.0366	0	0	0.0283	0	0.0474	0.5611	0	0	0	0	0.0128	0
RNF144B	20.6871	23.5127	36.4763	7.7106	20.6543	23.3475	2.8347	68.972	9.8655	3.6161	10.5637	13.5341	5.7392	7.2954	28.9581	19.6548	0.8193	11.9606	27.2892	52.2945	10.0551	2.1348	14.1768	4.2617	119.548	27.4983	18.8269	3.9801	10.296	3.0708	14.5533	1.6198	19.4513	12.1197	33.4564	1.6678	30.2204	12.0577	5.7593	11.6669	9.2036	23.4032	5.5764	5.9374	12.4565	7.2619	8.4276	3.1639	0.198
SFTA1P	0.0178	0.0766	0.1185	1.0336	0.0306	0.4151	0.2113	0.1321	0.249	0.332	0.141	0.0504	0.3276	0.2667	0.1074	0.1581	0.1244	0.044	0.0571	0.0915	0.0813	0.0581	0.2392	0.0506	0.0184	0.0779	0.166	0.1294	0.0329	0.206	0.0318	0.3557	0.2683	0.087	0.0521	0.1286	0.1037	0.1826	0.284	0.0459	0.0654	0.0576	0.1817	0.0204	0.2472	0.1208	0.0474	0.1039	0.1316
SGMS2	0.4977	3.4421	8.7827	0.7709	4.4651	2.6762	1.4443	10.2522	1.0608	0.4289	0.1389	0.1472	1.8844	1.7118	1.5603	8.4681	0.7416	0.2657	1.8649	3.0036	1.8042	1.6074	0.6979	1.5801	0.9578	4.9352	1.6064	0.3235	4.118	0.7537	1.7367	4.8997	2.4715	1.0517	3.1936	0.1116	0.3088	1.2343	0.0968	1.9014	5.9699	0.5121	2.3853	0.7737	0.4508	0.6966	2.3898	0.4112	0.0183
SLC8A1	0.238	0.1057	1.6977	1.5556	0.6687	0.3367	0.2883	0.1189	0.3373	0.8891	0.147	0.227	0.4312	1.2872	2.3274	0.0947	0.0181	0.0638	0.1299	0.7434	1.0709	0.4895	0.219	0.247	0.2135	0.2307	0.621	1.486	0.3729	0.0631	0.1639	1.9749	0.2765	0.1389	0.1438	0.0466	0.2624	0.1943	0.326	0.3694	0.1203	0.2341	0.3692	0.2754	0.157	0.2894	0.6741	0.0694	0.0127
TGM2	17.12	2.5317	23.4335	45.265	8.4989	2.8445	142.629	7.3308	11.5024	29.1559	16.8252	22.3769	10.7297	104.095	95.0983	20.0675	6.3763	23.9081	36.9802	88.9242	12.0179	10.3507	12.0598	48.8013	8.0376	4.8219	19.9126	50.9979	8.2546	19.3373	9.131	9.0859	18.7893	15.6193	30.3651	1.6941	14.3872	5.2461	1.044	18.0264	1.9814	5.6416	36.1529	9.1224	30.029	19.8901	40.7906	6.2335	1.8736
TK1	78.0545	77.9289	113.618	141.391	128.367	156.811	83.6409	133.566	238.306	85.0308	81.2144	262.945	124.012	36.2937	55.4924	47.8259	167.319	164.387	73.791	52.8093	115.706	93.3565	145.415	39.378	39.9837	88.571	49.2357	112.826	225.684	55.1927	118.773	156.593	134.486	142.776	129.79	19.5471	23.3089	63.6703	74.3408	94.4593	111.866	72.9759	140.465	116.135	80.6706	18.6163	86.0211	31.7974	32.6131
TNFAIP3	8.0705	14.0879	45.6822	19.4059	9.0038	2.8293	9.2331	40.9425	12.5084	12.9822	4.0836	126.486	26.5009	10.7754	83.5494	17.7101	33.3366	28.4868	50.3525	21.185	28.3006	19.0592	62.142	4.012	58.1053	127.288	10.9774	2.9255	5.6313	11.2051	18.5012	15.9816	48.6648	7.3656	74.1605	4.6603	7.9013	13.1659	4.6105	24.5054	27.1153	10.8198	13.6629	4.2498	3.2486	8.9776	52.7548	36.2941	8.696
TUBB6	69.7299	139.093	130.489	33.0013	36.1711	192.776	19.5699	146.073	59.5515	116.313	50.6704	67.53	18.1296	36.2648	55.7862	73.8405	36.1568	94.6935	82.1131	61.6597	60.0429	145.763	50.5152	98.9369	102.336	76.3001	21.9183	10.1761	27.8698	20.6267	207.559	32.4977	65.8636	15.6447	93.3804	10.2409	27.5915	69.6548	43.7148	114.876	206.684	26.9716	137.13	3.9694	28.908	113.803	47.9811	21.6038	5.7506
VGLL3	0.1336	0.8184	1.615	0.4937	1.6897	1.6953	1.3934	1.2737	0.2349	0.8209	0.0608	0.21	0.2782	0.2032	0.2338	0.232	0.115	0.1428	0.0999	0.3472	0.7259	0.3146	0.2574	0.2315	0.1745	0.8095	0.4652	0.0785	0.255	0.0915	0.3098	0.5819	0.1743	0.2246	0.473	0.2274	0.0629	0.3192	0.0774	0.0973	0.1688	0.4507	0.2099	0.2497	0.4091	0.1861	0.1835	0.0934	0.0183
WWC2	0.8903	18.2583	14.3994	7.3612	10.498	11.8065	6.4538	27.6558	3.5382	10.2402	0.3956	4.4561	4.4959	4.6881	3.6074	24.7811	1.1757	1.1332	2.9986	8.9209	5.2955	4.7044	1.446	11.161	12.8911	6.3697	6.7354	2.0989	5.6583	0.6409	5.0194	7.1974	9.1258	10.7046	5.8264	1.0395	13.9078	10.9188	3.5402	6.8705	15.9949	2.2965	4.5737	4.4714	4.9947	2.5243	3.7992	1.0112	1.2097
ZNF367	2.2922	14.636	14.5644	9.5934	16.2604	15.0238	10.1581	37.6716	6.7092	5.4871	0.8077	19.6201	10.2548	7.1588	7.2699	13.1006	1.7289	4.6681	3.2866	11.887	23.5739	7.9951	10.4497	17.4946	17.3901	21.986	3.8835	3.4928	16.6288	2.1929	6.0121	9.6243	11.9033	6.7341	39.0496	2.4685	7.226	13.1471	1.4149	9.4378	30.5201	2.3196	17.935	7.3061	4.1342	2.3289	5.8894	2.2232	6.9419
C10orf90	7.8183	0.0113	13.1168	19.2977	5.2643	0.0287	17.9905	30.0297	9.662	10.3556	8.2163	32.6351	6.6652	15.9718	11.1775	15.3049	0.0293	34.3485	12.8859	25.3593	17.0997	11.6342	20.2101	7.5989	23.8566	14.5019	1.7999	13.0167	6.4292	17.6717	20.1145	5.9083	19.4844	17.6685	9.8791	4.0625	21.4164	1.4908	1.1006	18.6958	2.9099	16.2995	24.9044	5.4692	10.6389	6.1807	32.2092	4.0307	6.32
PELI2	1.4362	27.1065	8.9595	8.0911	16.5227	24.5395	18.0817	23.4445	5.2904	3.2252	0.7126	9.6207	3.4417	6.4808	6.7211	19.775	2.4428	6.3909	9.2535	19.6345	11.421	4.4572	4.9076	7.0374	14.6722	4.0124	8.1816	4.3726	13.5708	3.3385	6.983	4.2809	14.7233	11.8776	15.896	4.4903	6.2797	12.7021	10.8027	19.6638	29.1401	10.0738	6.2078	13.0653	15.9566	4.3747	5.9568	1.9439	2.297
NFE2	0.6001	0.5161	0.5926	1.4163	1.1748	0.8548	1.3943	0	0.5961	8.6509	0.0863	0.6114	1.2648	8.3504	0.1446	0.2662	0.4859	1.2139	0.282	1.3055	1.0674	0.4698	0.1735	8.8267	0.0743	0.9232	0.2483	7.7641	0.0887	0.524	0.9852	6.1792	0.3975	0.9374	0.6318	0.101	0.2794	1.2565	1.5472	0.7409	0.2936	1.7063	2.2326	0.3571	1.4774	5.0982	0.4786	0.1399	0.0197
MGP	1517.87	40.2134	12.2571	10.4729	387.253	744.257	105.019	4.2228	3.6896	194.822	26.5939	2.4649	105.35	910.764	9.2168	6.1651	5.7051	1.963	7.2615	4.2942	65.2753	7.7754	9.5121	1864.86	15.0356	3.1599	820.635	21.7533	178.098	534.128	7.9586	1467.18	5.7672	3920.78	4.4623	6.4349	4.9	165.286	562.241	71.6865	0.8411	4.8033	21.8535	476.855	4.2408	2654.47	2.1676	13.5892	0.6125
BMF	7.591	62.7324	48.8076	24.3325	41.3434	28.212	35.4659	15.775	11.4181	4.2378	17.1134	6.0018	14.3038	11.561	16.5465	15.7839	8.7152	17.096	7.297	19.875	59.7433	35.5502	1.2147	3.4846	10.6219	8.201	22.7316	24.6246	29.8039	8.5718	23.0885	3.7196	2.0848	12.8273	6.0091	8.3294	28.7411	3.389	3.7556	9.0668	14.0993	15.9929	15.1385	8.0199	13.387	29.0815	10.2568	1.8021	1.4695
NCALD	1.2271	4.109	1.9889	2.6257	15.4892	11.9003	28.3577	1.2231	5.3467	0.5517	2.4194	11.5286	1.0715	4.6481	60.2057	21.8792	0.9353	9.5164	8.1057	13.0114	4.2294	7.8592	14.8221	1.1533	9.7902	9.08	0.9777	47.6538	0.3518	3.3327	7.9534	7.5713	0.4565	0.7344	6.0357	2.2928	1.5361	2.9853	0.1685	0.1451	3.2001	1.0861	12.7503	0.6376	0.6541	4.0872	15.5986	1.0684	2.2565
GAS7	36.7911	618.777	198.771	393.592	295.203	102.608	230.325	375.946	65.4084	340.271	41.6827	20.9165	228.843	146.173	66.6461	199.26	111.111	117.185	64.4724	42.3551	350.168	193.975	28.0372	212.762	112.74	59.6875	319.667	731.168	34.357	32.4977	271.642	503.795	47.7607	233.529	88.4764	25.4933	3.2588	536.07	139.203	111.515	145.834	84.0563	117.183	108.139	228.724	150.833	135.339	4.2071	3.8391
TRIB2	80.4308	527.351	202.552	564.107	655.83	110.557	94.691	927.338	116.563	257.94	224.862	361.383	89.6506	181.938	334.754	211.914	116.897	130.793	116.596	408.505	415.763	199.942	449.881	131.135	726.737	91.7348	589.251	287.941	493.639	60.6155	222.941	358.304	236.072	588.538	186.647	49.9719	64.6369	185.278	236.716	400.478	457.99	580.707	277.059	579.608	594.732	147.072	212.894	64.2154	116.939
HTR7	0	0.1405	0.4344	0.2493	0.4629	0.2461	0.3292	0.0726	0.0761	1.3388	0.0117	0.0154	0	1.4177	0.3234	0.4891	0	0.0605	0.0873	0.0838	0.4284	5.1332	0.0337	0.0772	0.1348	0.5855	0.3042	0.1524	0.0604	0.0839	0.2915	0.1467	0.0246	0.0798	0.2548	0.0491	0.0543	0.0186	0.0237	0.1471	0.1599	0.0528	3.9132	0.1496	0.0283	2.5654	0.1737	0	0
GLT8D2	0.3641	2.5725	2.6675	1.1466	3.3054	3.8477	3.8235	1.2595	1.7224	15.8418	1.085	2.3882	0.4675	1.2195	0.5821	0.7306	1.0531	0.5133	0.6113	1.2456	1.641	1.8853	0.179	4.3766	0.3398	2.6828	1.4173	0.2697	0.2563	0.4899	1.3151	91.1982	0.3132	1.044	7.3191	0.6461	0.6631	0.5722	0.4019	0.223	0.3394	1.8489	5.3467	0.4961	0.451	1.1754	1.4752	1.263	0.0711
MAN1C1	3.1483	6.3029	2.1542	15.9947	14.6656	18.5574	4.1793	0.6893	6.6906	23.6371	1.9525	4.5586	1.8404	8.801	5.1821	9.567	0.7238	0.8992	1.0606	7.0869	12.6389	27.7875	3.3603	35.4463	5.3147	1.7358	3.4783	3.3617	2.1945	0.9523	5.3435	24.6229	1.4001	3.4359	1.7458	0.4343	0.6687	5.0128	11.4641	0.5253	3.6971	2.7614	11.0174	8.1623	3.5736	12.4739	4.8699	0.3039	0.5929
DDIT4	32.5018	46.0132	37.2617	141.556	42.2288	175.464	114.283	168.072	55.5662	31.4516	3.9127	94.5592	119.007	19.296	54.2196	38.1522	13.3004	107.603	79.1438	56.787	43.1346	27.6822	18.3014	59.3348	67.4158	51.269	30.9981	100.687	37.7581	91.529	58.5673	57.5588	41.0294	85.424	41.2658	9.4097	21.9243	289.698	18.439	142.668	56.1019	20.254	292.878	42.0937	74.8081	87.9469	120.582	4.0067	2.6508
FBXO32	43.8108	103.95	61.537	40.3322	39.811	42.2961	30.0606	45.0002	45.6348	22.9503	14.4921	104.645	31.3726	59.133	129.391	235.804	22.7705	34.7407	31.9211	28.6494	47.5562	75.4544	113.994	21.672	91.0545	112.856	41.0497	30.6938	86.4227	90.4125	34.9848	10.1786	42.0398	110.484	39.6714	17.9033	33.9423	68.6995	17.3143	37.2	34.4393	13.3578	51.0723	107.833	18.9897	68.0146	126.384	31.5631	13.4417
MSC	35.3792	92.1693	8.3352	4.9427	330.218	22.1708	4.837	36.806	7.1034	7.5246	66.7048	5.3936	14.0124	8.1937	88.0815	114.148	13.9595	6.0262	15.4269	26.306	41.7772	24.7495	24.441	3.857	297.461	74.8266	194.015	7.0408	20.4351	4.8261	34.9208	29.8373	15.3554	5.6349	23.2622	1.8552	2.5887	45.2395	41.7388	36.5958	26.332	8.124	3.4202	228.307	39.0241	4.1548	11.8108	41.3886	0.6827
HTRA1	16.1083	68.319	30.0661	19.0029	86.6027	89.0844	113.712	64.7206	15.6109	61.2268	57.8747	15.7663	5.3131	133.169	40.6214	82.5155	63.9113	17.0401	17.3959	16.0384	45.5568	312.513	37.0836	941.676	15.7563	62.7564	30.2539	7.4223	10.8531	36.0316	160.554	94.9781	19.4676	115.312	117.879	10.8019	11.2332	1693	163.051	15.5951	17.2052	70.8092	69.218	46.6488	14.5761	336.579	165.905	29.4231	1.9235
COLEC12	2.3945	3.2966	5.9266	3.9447	6.7651	2.7932	6.1994	2.3701	2.3617	12.9915	1.4	2.4702	1.7984	1.855	8.4576	0.9764	0.426	0.3621	0.3796	2.0133	6.5437	2.8387	0.1754	5.7466	3.7365	2.7683	1.5663	4.5246	1.256	0.982	0.7512	7.1215	0.2209	5.2667	1.0014	0.2832	0.3789	1.3273	0.6265	0.8742	12.1216	0.6905	2.1652	1.8652	1.2589	33.2751	2.4848	0.3916	0.0887
EYA1	0.7484	0.0196	0.104	87.5296	61.7576	0.3334	0.0289	0.0541	0.0236	16.2796	0.0438	0.0344	2.2069	20.0975	1.0737	0.7421	0	0.03	0.2015	0.2185	2.1367	0.1852	0.2889	0.1323	0.0188	0.0266	3.3049	18.5582	21.0575	0.0703	0.3909	18.3528	1.0808	0.0099	1.3879	0.0146	0.0304	43.1569	13.6823	0.4461	0.0298	0.0197	0.093	35.5189	32.0854	0.0206	0.089	0.0071	0.005
KCNS3	18.4229	2.9825	1.4119	57.4244	3.5654	25.4578	58.3197	14.5146	52.8809	42.0315	12.7941	14.95	0.8443	0.3527	8.0384	3.4784	0.5569	11.6308	17.5492	27.9855	26.7531	12.6375	12.7289	20.3982	7.7428	0.8718	3.9021	9.9635	1.4742	11.6433	5.2097	31.8977	2.5932	7.7014	34.2029	0.0763	23.8184	0.6809	15.2203	12.2438	0.1553	10.5656	9.1723	1.3903	8.7399	4.2816	21.5728	0.9087	0.1636
CA11	7.3158	38.1015	7.6113	24.1657	12.0879	2.3954	3.0752	50.7227	6.9439	65.0098	5.1151	22.1335	10.0361	35.5003	25.5911	13.0569	12.8991	3.4515	12.3919	10.0795	49.317	21.3276	1.9558	15.3194	8.9585	17.3247	27.5317	47.9854	37.5378	8.6091	18.4387	9.3064	12.2855	26.1341	8.6089	2.645	6.494	14.9588	13.573	8.7345	12.7272	16.8262	6.9818	42.2283	30.3711	8.1665	22.0067	5.7237	2.6783
HLA-DMB	12.1234	3.2781	31.2677	29.5698	12.3734	2.0378	10.5533	2.3329	19.446	9.8591	7.4197	6.5881	19.4511	68.9459	79.7184	3.5993	1.8367	1.4712	5.1619	17.8788	35.2863	60.1588	0.6981	11.4256	4.5147	11.5216	62.1295	3.2251	11.4505	2.7159	4.5639	14.5013	2.2211	3.6015	1.2345	0.6577	4.927	4.6173	0.4452	1.6288	100.296	13.0177	4.7156	11.4821	1.7161	9.4739	29.0601	2.3214	0.5952
SH3PXD2A	5.0949	38.6046	22.1975	71.3901	22.0849	52.3263	72.3027	22.6355	15.5418	23.3557	6.8397	52.6588	9.4594	10.9191	51.7268	38.749	14.0103	42.4985	18.1624	14.5658	45.9724	23.4067	31.0546	118.451	43.6818	21.6688	18.9734	22.614	4.2168	21.6984	45.4558	67.8113	8.338	21.8736	19.6357	7.9709	12.6991	7.2693	7.523	39.9996	20.5661	7.9921	40.2596	12.2079	22.1591	8.5524	81.335	14.8782	3.2618
CFI	0.2909	0.4002	0.3867	1.2783	0.6194	0.1116	0.4276	0.1207	0.7494	18.4525	1.5398	0.1098	1.0693	13.1264	0.3505	0.7741	0.0731	0.0431	0.1616	0.2149	0.7163	0.2783	0.2763	12.7033	0.084	0.2746	10.629	0.4704	0.7309	2.4803	0.3945	7.2673	0.035	0.3787	0.1588	0.3496	0.2515	11.2143	1.5336	0.0748	1.11	0.6516	0.252	0.5193	0.2522	13.447	0.232	0.3322	0.2673
GRIK2	0.0429	11.7798	0.3464	0.6549	0.1904	8.876	3.1543	4.5802	0.6439	17.0123	0.1235	0.0202	0.0088	0.2676	0.9358	0.23	0.1148	2.3027	1.5969	0.3156	0.3017	3.0485	0.0369	0.027	3.5706	0.3689	4.3364	15.1791	0	4.3263	0.3957	16.8713	0.4953	2.7236	0.4602	0.2794	0	1.8313	0.0259	0.368	2.0384	0.0077	1.5493	1.146	0.1178	0.0162	0.2662	0	0.1761
ARHGEF3	7.9352	8.1504	10.4674	21.129	14.9601	14.9685	17.7611	8.7197	10.8165	9.6953	0.9181	3.0105	4.0903	58.4185	21.7094	3.5961	0.855	2.4045	3.1603	9.6298	12.3912	8.3558	4.4075	12.9887	7.7397	5.9562	5.5595	4.8109	5.084	5.051	7.6344	13.7613	7.4529	1.6843	5.6417	0.933	6.2815	8.5294	4.6537	3.6608	9.7586	4.9607	5.8356	5.9225	1.7796	9.5497	11.4768	1.0706	1.0332
KLF9	3.0798	42.1817	13.1867	22.5564	21.9841	62.0318	37.3949	89.2109	3.7934	22.5273	1.7028	12.9757	8.6358	50.1999	11.4913	27.284	5.3326	1.1897	13.6165	17.6467	42.2264	38.0742	3.417	19.0745	16.8551	8.1339	24.5841	10.3289	5.9338	4.1241	11.5691	27.8653	0.891	23.8462	37.4051	14.4385	10.7521	154.845	8.0171	39.3577	84.8732	2.6206	26.3801	10.5738	6.613	65.3435	5.3032	1.7564	0.4047
PCSK1	0.1588	0.3187	0.5932	0.4632	2.7819	0.29	0.7908	0.0942	0.2136	27.4218	0.0762	0.3396	0.3373	5.537	56.2699	23.7037	0.0517	0.0784	6.1528	0.4563	2.0523	3.373	0.7979	25.8932	0.0874	0.1296	0.2739	0.0988	0.0587	0.1904	0.6046	1.5107	0.0797	0.1895	0.5677	0.0064	0.176	1.2049	0.1227	0.2587	0.6475	0.1368	1.6998	0.1939	0.1285	94.6554	1.2948	0.2283	0.0261
SULF2	5.1122	9.2328	11.2624	20.8892	22.8621	25.9783	15.1612	9.0177	7.1409	18.0994	18.6419	9.7977	12.3094	12.2262	34.7641	4.6293	6.5185	5.9801	5.1788	7.493	26.5404	5.7343	26.5718	8.2316	9.9743	25.1211	12.2883	54.2806	22.828	4.6941	6.2263	13.3133	3.0911	5.3103	8.2641	3.2106	5.2701	3.6941	32.1119	20.3278	9.6607	9.0482	30.1367	29.7883	5.3254	8.596	55.1456	7.9339	2.6844
DEPTOR	14.7034	20.2399	13.3677	2.8554	10.9751	4.1995	10.9807	8.6093	4.5071	15.3017	1.9411	3.2588	6.0851	53.1765	13.939	34.4989	4.8831	1.6779	3.0675	2.5258	6.7452	17.3013	1.1367	89.724	27.6138	3.8312	21.9137	7.1853	7.5003	6.0446	5.5675	11.6981	3.9003	14.335	0.8419	4.7881	10.3392	41.523	9.1788	2.8325	9.1638	6.0229	4.7043	8.8458	9.1901	29.6619	4.5634	0.8052	1.9132
FRAT2	7.3662	17.2303	16.8359	12.2482	14.6564	27.7986	7.7991	18.8637	7.5298	4.2579	15.4375	21.637	7.6568	7.2973	19.875	8.6186	6.915	11.9374	13.7567	13.9449	25.5438	9.3623	12.9011	5.6908	32.4337	10.0802	19.1315	6.9521	13.3763	7.9919	17.1567	2.7626	15.6774	17.7324	10.5727	4.3201	12.3746	13.5565	10.7799	27.148	14.074	13.0769	7.1525	14.7669	11.1199	12.2823	17.8277	2.2498	2.0215
FOXO4	22.8374	91.8485	31.9041	28.0893	32.0867	23.6349	113.653	40.9071	21.0788	12.1115	16.4688	20.541	25.5638	20.0305	28.3925	45.1867	10.4362	17.5556	25.9623	25.9383	79.8399	39.0844	17.226	4.7959	89.8509	16.6398	67.6161	14.6155	14.1029	30.5391	32.0745	9.3777	30.4815	60.0067	18.6295	6.7275	34.2025	30.4332	18.9023	20.6724	20.5565	13.5073	15.0259	19.7471	28.8922	31.0427	17.0089	2.4505	5.0465
CHI3L2	5.9904	2.1281	2.2067	3.6599	4.1238	44.7748	38.4058	0.3827	1.5629	5.7872	2.4514	1.1367	8.9858	1.8803	9.0239	0.9544	0.5047	0.5945	0.3494	0.3886	7.2619	10.6307	0.0711	4.3773	0.6747	4.1981	18.0054	1.2492	0.2863	1.658	1.3209	1.168	0.0777	2.353	0.1175	0.5173	0.7155	1.1361	0.0499	0.0221	1.4317	0.8714	2.9829	0.8077	0.1045	2.0809	13.7292	0.341	0.1695
GNG7	16.4569	86.8617	43.375	129.428	500.806	15.039	47.036	59.8489	39.0875	42.6551	25.2614	44.3956	40.9127	47.7086	34.5182	99.5966	14.8755	41.2611	87.1655	30.1774	92.5104	145.22	25.6959	327.818	60.4443	31.8569	35.3435	63.0848	98.0954	21.9995	38.8194	29.4426	34.6158	54.5958	4.8041	18.1009	31.9376	505.682	47.8638	2.1503	31.1322	63.8171	3.7359	81.559	155.687	125.765	38.7264	5.0384	35.9001
TRIM2	3.084	101.399	20.995	53.6022	27.1447	25.9158	12.0679	42.8038	12.1972	25.3532	1.629	4.1872	13.6449	13.4613	9.0789	8.9897	0.347	3.191	9.8234	11.6566	11.2953	18.7182	3.1475	7.0683	27.5338	5.0672	72.9842	6.0353	14.1912	26.3075	17.3881	16.9368	13.1267	100.69	26.4696	1.7945	9.9413	43.9262	13.5354	14.8124	26.2894	11.1335	18.8089	26.3358	11.92	7.2216	72.1715	0.8159	1.5337
UST	3.1038	37.3426	6.0497	7.312	6.7127	17.6604	3.8317	30.2857	4.9259	13.2028	3.2814	6.0209	6.62	5.4124	13.6699	5.874	3.201	3.224	4.4872	4.9571	8.6875	6.4955	3.0836	10.9089	18.2207	6.548	5.5411	25.6697	6.274	1.6034	9.0786	14.495	5.937	8.4305	3.3895	1.0238	2.3087	9.0291	3.8957	4.6973	7.6212	2.614	3.6722	3.5386	8.3855	3.322	3.4588	0.3604	0.919
DDR1	15.7188	93.608	117.321	30.7292	63.0583	105.616	63.8794	105.82	15.9764	64.8957	24.1721	80.8388	29.9665	39.3085	65.1698	127.744	51.9236	101.824	78.3504	100.118	96.5945	205.459	51.9095	224.946	25.9798	73.0428	59.1903	18.1077	151.002	36.3482	69.6995	27.652	82.3609	89.0513	86.6449	33.0933	43.1534	34.4023	26.1453	58.4351	51.7619	53.8164	125.026	20.4579	28.3851	248.82	33.458	5.9603	12.713
BFSP1	3.382	15.5196	6.1993	15.1656	10.4021	1.982	13.7833	29.4057	0.8748	35.2096	1.3191	0.746	5.7524	9.6677	2.3318	44.2732	0.7752	16.666	4.0261	7.6661	51.4333	8.2141	0.66	27.4214	6.3343	1.6914	16.2242	11.1815	7.7414	5.6397	7.1162	35.8941	3.5461	39.4551	6.7575	4.0043	2.2801	21.1576	10.8087	4.8691	8.1498	1.1779	15.7573	1.1553	1.1231	18.249	1.6327	0.5196	0.4832
BCHE	4.3758	199.478	40.5881	0.3193	320.351	34.4698	37.604	287.29	10.3449	13.5322	0.3054	19.9078	4.5249	59.1487	7.5334	51.3257	18.1466	26.3048	38.8742	32.1334	39.7454	11.7437	8.5199	13.5441	219.855	29.1795	53.1234	231.557	63.3192	8.6545	11.5814	22.4941	51.3918	79.2596	72.1545	23.2242	6.4315	614.794	18.2122	5.7467	79.3803	0.0398	0.0471	62.5648	112.601	2.7326	1.1044	3.0125	11.937
COL6A1	45.2068	389.833	236.17	141.118	355.466	711.087	583.264	240.2	112.547	228.366	170.608	116.702	83.8848	67.9305	138.841	245.367	297.254	165.616	92.544	184.102	445.314	432.987	92.8404	660.973	132.06	226.211	244.341	137.724	176.732	93.3441	183.349	367.954	78.7767	219.252	157.084	121.985	65.0449	111.516	193.872	121.354	252.253	216.349	318.388	212.587	208.502	845.667	56.4442	73.5583	31.6316
PCDH7	9.0897	93.4909	19.8838	63.8485	182.549	3.9958	44.0367	56.6416	16.925	33.8693	4.3896	0.1005	28.9382	26.2596	1.4788	28.2245	3.701	12.8401	4.2144	31.6702	45.9171	33.8429	0.4207	54.5154	85.0078	0.5829	33.7558	25.6691	21.2278	12.369	29.4795	6.5378	11.5087	61.2088	12.6072	6.9238	29.9311	224.988	15.7148	20.6659	52.7696	7.7752	6.0947	35.0544	64.753	13.4345	3.3916	0.0405	2.3441
TGFB3	4.9954	6.1407	6.837	9.6334	16.4577	4.7152	16.5688	3.5897	8.6211	18.1333	4.0459	2.9811	2.4884	4.6066	3.5335	6.4302	3.3657	1.219	2.7029	2.3736	6.0671	2.7393	2.4663	21.0756	5.8692	4.6228	6.8873	2.3305	4.5951	1.8409	1.7248	107.251	4.7245	2.6508	3.4722	0.9137	2.0765	11.1962	8.3603	4.3438	1.4744	2.9708	9.9486	5.1078	5.6955	3.6929	2.3963	4.436	0.2762
AKR1C2	0.0615	0.0661	0.0917	0.0357	0.6859	0.2164	0.1665	0.1301	0.0681	0.0491	0.1642	0.4058	0.5809	0.0394	0.0378	0.5743	0.098	0.9313	0.1594	0.018	1.1711	0.1527	0.0725	0.0498	0.2535	1.105	0.9355	0.0637	0.0973	0.7666	0.1567	5.5622	0.3304	0.0143	1.1724	0.0897	0.0219	0.7692	1.7675	0.0226	0.8161	1.579	0.0112	0	0.1142	0.2777	2.3339	0.087	0.0576
LAMA4	6.2764	72.0474	33.4543	85.7209	108.125	37.6747	39.1111	117.734	12.4448	170.426	9.2907	4.2642	29.8822	129.853	12.8629	90.4004	8.313	19.4484	15.0728	33.6555	85.7344	21.4245	6.665	518.188	38.8217	8.9204	74.6957	126.597	36.9696	21.3907	19.8499	191.712	22.5449	86.4299	22.4059	4.5969	5.1668	127.382	68.2961	33.2271	11.579	32.4844	38.924	16.0664	45.6739	124.402	9.5512	7.9464	3.4253
SLC6A10P	0	0.0136	0.0241	0.0129	0.0217	33.095	0.015	0	0	0	0.0546	0	25.9917	0	0	7.0068	0.0088	0.0312	0.0406	0.026	8.2011	0.0275	0.0261	2.071	0	0.0111	0.0131	5.0283	0	0.0813	5.9207	0.0758	12.5627	0.0412	0.037	0	0.0211	0	0	0.0163	0.031	0	0.0161	0.1159	0.022	0	0.0673	0	0
HBP1	9.334	47.2209	42.1697	28.7596	43.4969	38.5755	50.9711	36.0349	10.5738	59.9495	3.0545	6.1737	16.0829	37.759	30.6303	56.8554	4.2626	13.5869	18.2322	25.322	53.5794	23.2233	7.2638	37.8132	68.0361	20.3585	28.2588	40.7285	25.6559	7.7043	21.3476	42.0801	8.6811	35.747	25.7365	6.609	30.7723	40.2388	7.6535	11.476	28.6186	8.9746	22.8861	21.1695	15.2687	29.7271	19.2175	1.4067	1.5404
CTSF	94.9906	210.52	187.301	28.8981	192.446	75.1484	180.738	103.904	17.3929	60.1569	275.254	91.5976	83.063	29.9908	207.705	243.327	78.9803	84.7997	165.255	132.53	146.296	225.633	89.0354	77.7455	318.032	96.3116	58.8617	73.473	106.827	38.623	96.8464	24.7742	83.2542	123.449	131.036	56.9432	796.098	46.8934	86.8347	51.5577	80.5929	70.3769	109.705	125.207	39.1484	247.484	83.1505	7.1486	36.2848
PCDH18	0.2969	2.7724	2.4006	2.054	6.3518	3.4976	3.9021	3.3324	0.9282	1.6117	0.2624	1.5845	0.8212	1.7073	1.0735	0.903	0.5626	0.1988	0.7793	1.5234	2.2053	0.6641	0.4291	2.053	1.2862	1.8019	2.0362	0.7124	4.1382	0.3813	0.9008	2.277	3.1033	2.2088	4.2506	0.2345	1.4952	0.8495	1.2411	0.9492	0.3632	0.7949	0.7999	2.2815	2.7137	0.3546	4.7249	0.3559	0.2506
IGFBP5	20.7895	35.5703	30.9451	1268.25	166.103	3430.47	824.276	47.7468	17.2292	101.772	28.6689	31.5025	7.2663	44.2918	61.5696	16.6132	11.2238	2.9864	11.7693	12.9892	28.0945	18.2929	8.2405	2387.65	19.7688	18.6402	33.6428	707.267	18.9477	6.0606	135.828	105.714	4.3841	22.6252	20.0348	7.312	5.8633	40.0885	120.991	167.201	22.9715	14.474	593.356	31.3207	57.9605	44.2498	7.1828	14.982	9.6368
ZCCHC24	9.5731	156.967	58.7151	154.746	64.0418	24.6859	139.277	39.0238	39.5427	154.815	13.4071	9.3168	18.9728	164.308	21.6747	93.0935	8.5256	48.3981	25.3736	85.3572	77.1613	110.524	8.7922	366.213	130.99	18.6217	23.0637	61.1913	18.7684	13.0299	44.1023	207.599	24.6782	63.9951	33.9102	5.1928	5.8943	21.2635	11.2297	45.5504	93.0555	51.8435	35.018	19.7122	107.515	135.321	47.7798	2.1279	2.0281
YPEL2	2.7118	18.6898	10.0528	18.8933	9.784	18.9024	12.7975	14.6296	3.7283	6.6293	1.1112	1.2237	6.4303	5.6232	4.1075	8.7028	1.3242	2.3238	4.1294	9.7196	9.967	4.4439	1.642	18.4684	12.8957	2.8832	7.5469	27.56	4.5771	3.6248	6.3923	26.3492	5.0145	18.7441	5.4839	2.6522	7.5872	4.7773	2.2755	4.1753	3.3966	5.1815	9.0285	9.3997	6.0184	6.4073	4.064	0.5926	0.2086
MEF2C	1.3076	25.1888	24.2246	6.9997	27.6053	16.7607	21.7767	19.2258	4.3847	8.2323	0.8815	4.2968	10.1401	8.5447	8.1366	11.6209	0.5221	2.2736	4.1235	5.095	12.692	13.1628	2.2266	6.4907	33.7122	6.8622	12.4703	35.1119	16.6367	4.666	8.2619	2.2724	4.0894	9.5087	3.2878	3.3986	18.1397	16.6208	0.615	2.9602	20.9042	2.0268	15.9663	13.7993	5.7598	4.143	4.5988	1.2287	3.1908
MAF	14.8869	41.3469	7.5415	101.964	19.1078	24.498	32.4339	49.8768	6.9618	12.1056	3.1708	6.5897	10.5163	20.8444	72.3951	34.2905	2.1609	14.8045	41.4923	27.4928	56.0865	15.772	5.8059	22.1091	40.9984	29.9573	56.5693	10.5273	5.1511	17.8068	43.2406	19.0023	10.8332	4.7607	15.523	2.0407	12.9424	14.1005	11.0339	21.7735	62.4274	17.8493	53.0636	15.8218	13.3059	28.1262	32.9852	2.092	2.8989
CHST1	0.7537	0.771	1.1081	1.1995	1.5552	2.4642	1.7293	0.6126	2.8017	4.8113	2.5617	0.9059	0.998	3.2558	2.0823	1.6849	0.7297	1.1546	2.8568	0.6861	2.4532	7.1635	0.5647	105.064	0.7147	1.5088	0.7294	0.3151	0.9658	1.5767	2.1367	2.5592	0.9882	0.5934	0.8413	0.2338	0.8489	0.6917	0.537	0.4534	0.3271	1.6889	16.2939	0.6121	0.4742	33.5372	2.1168	1.2467	0.4388
[truncated: 53 more columns]

## Sheet: Tab 5-Spearman's Rank
YAP/TAZ Up
Gene	Correlation	Correlation	Correlation	Correlation
Symbol	with CTGF	with CYR61	with YAP	with WWTR1
CTGF	1	0.83	0.47	0.59
CYR61	0.8	1	0.37	0.3
COL12A1	0.76	0.58	0.59	0.67
VGLL3	0.75	0.73	0.58	0.55
CRIM1	0.74	0.67	0.72	0.62
F3	0.72	0.64	0.41	0.52
DDAH1	0.69	0.71	0.55	0.62
AXL	0.66	0.62	0.49	0.64
SLC8A1	0.64	0.62	0.44	0.5
NLRP3	0.64	0.6	0.58	0.52
WWTR1	0.64	0.3	0.69	1
ELL2	0.63	0.6	0.6	0.42
IL7R	0.63	0.6	0.45	0.32
RFTN1	0.62	0.64	0.36	0.34
GFRA1	0.62	0.49	0.52	0.62
SMURF2	0.61	0.5	0.79	0.71
GADD45B	0.6	0.7	0.13	0.06
ADAMTS6	0.6	0.52	0.55	0.65
HBEGF	0.59	0.6	0.58	0.58
TGM2	0.59	0.59	0.17	0.41
ANKRD1	0.59	0.56	0.28	0.35
AOX1	0.57	0.63	0.36	0.33
EPAS1	0.56	0.66	0.52	0.37
ITGB2	0.56	0.56	0.21	0.17
CNN3	0.56	0.44	0.8	0.7
FJX1	0.55	0.5	0.65	0.76
OXTR	0.54	0.57	0.46	0.5
IL12A	0.53	0.39	0.31	0.57
GNGT2	0.52	0.47	0.05	0.11
DLC1	0.51	0.4	0.78	0.55
IL11	0.51	0.38	0.43	0.52
MPP7	0.5	0.41	0.35	0.12
MFAP5	0.49	0.48	0.16	0.22
SGMS2	0.47	0.51	0.75	0.48
NUAK2	0.47	0.49	0.02	-0.08
WWC2	0.47	0.47	0.82	0.6
MB21D2	0.46	0.62	0.55	0.43
MPP4	0.46	0.41	0.45	0.33
PAWR	0.46	0.39	0.5	0.43
LAMC2	0.45	0.4	0.21	0.12
PKP2	0.45	0.36	0.14	0.06
GADD45A	0.44	0.32	0.62	0.58
ESM1	0.41	0.31	0.46	0.62
ADRB2	0.35	0.48	0.27	-0.16
RAPH1	0.35	0.45	0.83	0.69
ETS1	0.27	0.45	0.63	0.24
KRT81	0.34	0.44	0.08	-0.09
SFTA1P	0.37	0.43	0.14	0.4
TNFAIP3	0.24	0.43	0.11	0.2
CEP55	0.22	0.38	0.5	0.51
KRT80	0.3	0.36	0.22	0.09
PRKAG2	0.04	0.36	0.37	-0.06
ANXA2	0.21	0.34	0.34	0.17
ANLN	0.29	0.32	0.65	0.67
TUBB6	0.21	0.32	0.37	0.36
RGS7	0.28	0.31	0.11	0.26
ZNF367	0.22	0.3	0.56	0.45
C12orf75	0.39	0.29	0.42	0.43
RAB3B	0.34	0.29	0.55	0.42
DIAPH3	0.26	0.29	0.65	0.63
DKK1	0.32	0.28	0.35	0.42
EPHA2	0.37	0.26	0.37	0.42
RNF144B	-0.06	0.25	0.27	-0.21
NPPB	0.18	0.23	0.06	0.1
ABL2	0.15	0.23	0.64	0.41
CLDN1	0.3	0.22	0.21	0.27
FSTL3	0.13	0.22	0.11	0.03
TEAD4	0.05	0.21	0.2	0.01
WWC1	0.06	0.2	0.11	-0.1
NAV3	0.29	0.19	0.73	0.36
YAP1	0.34	0.18	1	0.45
ACAT2	0.27	0.18	0.41	0.5
CPA4	0.29	0.16	0.28	0.13
FOSL1	0.19	0.16	0.25	0.25
LETM2	0.23	0.15	0.58	0.57
EPB41L4B	0.16	0.14	0.28	0.35
EPG5	0.02	0.13	0.58	0.22
TK1	-0.03	0.12	0.04	0.01
PCLO	-0.04	0.05	-0.02	0.07
CYTH3	-0.02	-0.01	0.45	0.31
SH2D5	-0.26	-0.03	-0.07	-0.28
PKD1L2	-0.25	-0.08	0.01	-0.39
Melanoma YAP/TAZ Down
Gene	Correlation	Correlation
Symbol	with CTGF	with CYR61
AKR1C2	0.36	0.29
ARHGEF3	0.56	0.5
BCHE	0.16	-0.01
BFSP1	0.3	0
BMF	0.41	0.29
C10orf90	-0.3	-0.11
CA11	0.02	0.11
CFI	0.63	0.38
CHI3L2	0.47	0.4
CHST1	0.67	0.52
COL6A1	0.62	0.51
COLEC12	0.65	0.48
CTSF	-0.14	-0.14
DDIT4	0.27	0.09
DDR1	0.13	-0.06
DEPTOR	0.49	0.35
EYA1	0.13	0.01
FBXO32	-0.06	-0.01
FOXO4	0.12	0.16
FRAT2	-0.01	0.19
GAS7	0.42	0.15
GLT8D2	0.73	0.63
GNG7	0.21	0.07
GRIK2	0.29	0.14
HBP1	0.3	0.21
HLA-DMB	0.55	0.52
HTR7	0.62	0.52
HTRA1	0.41	0.29
IGFBP5	0.7	0.52
KCNS3	0.29	0.28
KLF9	0.55	0.4
LAMA4	0.63	0.36
MAF	0.38	0.32
MAN1C1	0.54	0.37
MEF2C	0.61	0.45
MGP	0.5	0.17
MSC	0.12	0.15
NCALD	0.25	0.23
NFE2	0.17	-0.06
PCDH18	0.55	0.58
PCDH7	0.2	0.02
PCSK1	0.49	0.29
PELI2	-0.04	-0.01
SH3PXD2A	0.29	0.34
SLC6A10P	-0.11	-0.08
SULF2	0.51	0.48
TGFB3	0.65	0.58
TRIB2	-0.09	-0.08
TRIM2	0.03	-0.06
UST	0.4	0.41
YPEL2	0.45	0.31
ZCCHC24	0.52	0.26

## Sheet: Tab 6-Similarity CTGF H v L
id	CTGF	CYR61	COL12A1	VGLL3	CRIM1	F3	DDAH1	AXL	SLC8A1	NLRP3	IL7R	ELL2	RFTN1	GFRA1	SMURF2	GADD45B	ADAMTS6	HBEGF	TGM2	ANKRD1	AOX1	EPAS1	CNN3	ITGB2	FJX1	OXTR	IL12A	GNGT2	IL11	DLC1	MPP7	MFAP5	SGMS2	WWC2	NUAK2	MB21D2	PAWR	MPP4	LAMC2	PKP2	GADD45A	ESM1	C12orf75	EPHA2	SFTA1P	RAPH1	ADRB2	RAB3B	KRT81
CTGF	1	0.8	0.76	0.75	0.74	0.72	0.69	0.66	0.64	0.64	0.63	0.63	0.62	0.62	0.61	0.6	0.6	0.59	0.59	0.59	0.57	0.56	0.56	0.56	0.55	0.54	0.53	0.52	0.51	0.51	0.5	0.49	0.47	0.47	0.47	0.46	0.46	0.46	0.45	0.45	0.44	0.41	0.39	0.37	0.37	0.35	0.35	0.34	0.34
CYR61	0.8	1	0.67	0.76	0.72	0.66	0.73	0.68	0.71	0.62	0.63	0.62	0.69	0.52	0.61	0.71	0.6	0.67	0.67	0.57	0.66	0.69	0.53	0.59	0.53	0.59	0.44	0.53	0.49	0.49	0.42	0.47	0.56	0.48	0.5	0.62	0.45	0.47	0.45	0.39	0.34	0.49	0.4	0.35	0.47	0.47	0.39	0.4	0.43
COL12A1	0.76	0.67	1	0.78	0.77	0.69	0.65	0.72	0.58	0.67	0.57	0.54	0.62	0.59	0.69	0.57	0.67	0.57	0.62	0.46	0.58	0.6	0.64	0.46	0.59	0.49	0.42	0.39	0.6	0.52	0.42	0.59	0.49	0.49	0.32	0.53	0.46	0.5	0.5	0.27	0.44	0.49	0.48	0.4	0.33	0.44	0.26	0.37	0.29
VGLL3	0.75	0.76	0.78	1	0.76	0.69	0.71	0.63	0.75	0.66	0.7	0.67	0.72	0.57	0.63	0.7	0.72	0.6	0.65	0.51	0.64	0.58	0.55	0.64	0.43	0.54	0.46	0.56	0.33	0.58	0.56	0.64	0.54	0.48	0.45	0.56	0.45	0.46	0.48	0.46	0.35	0.48	0.47	0.34	0.48	0.5	0.38	0.36	0.25
CRIM1	0.74	0.72	0.77	0.76	1	0.64	0.73	0.81	0.75	0.71	0.7	0.7	0.68	0.72	0.81	0.58	0.77	0.63	0.65	0.56	0.65	0.66	0.65	0.63	0.56	0.67	0.59	0.54	0.5	0.69	0.45	0.4	0.53	0.59	0.47	0.61	0.48	0.56	0.36	0.37	0.47	0.51	0.58	0.41	0.33	0.53	0.5	0.45	0.35
F3	0.72	0.66	0.69	0.69	0.64	1	0.53	0.56	0.58	0.6	0.64	0.57	0.54	0.5	0.56	0.58	0.52	0.58	0.55	0.42	0.56	0.49	0.51	0.51	0.42	0.49	0.39	0.48	0.46	0.5	0.51	0.52	0.37	0.39	0.37	0.36	0.49	0.33	0.5	0.43	0.43	0.31	0.35	0.37	0.35	0.36	0.35	0.42	0.31
DDAH1	0.69	0.73	0.65	0.71	0.73	0.53	1	0.65	0.71	0.58	0.59	0.59	0.66	0.55	0.6	0.51	0.67	0.68	0.52	0.51	0.52	0.59	0.53	0.55	0.47	0.58	0.54	0.49	0.44	0.58	0.34	0.42	0.48	0.46	0.38	0.61	0.48	0.49	0.33	0.36	0.37	0.52	0.43	0.41	0.45	0.43	0.41	0.5	0.32
AXL	0.66	0.68	0.72	0.63	0.81	0.56	0.65	1	0.74	0.72	0.72	0.64	0.74	0.65	0.68	0.65	0.71	0.58	0.71	0.46	0.62	0.62	0.5	0.69	0.53	0.53	0.58	0.66	0.59	0.5	0.33	0.38	0.5	0.4	0.53	0.6	0.35	0.46	0.4	0.3	0.39	0.52	0.52	0.28	0.41	0.4	0.43	0.35	0.49
SLC8A1	0.64	0.71	0.58	0.75	0.75	0.58	0.71	0.74	1	0.75	0.84	0.68	0.78	0.63	0.6	0.64	0.72	0.56	0.72	0.53	0.63	0.61	0.46	0.86	0.38	0.58	0.61	0.8	0.36	0.55	0.49	0.4	0.46	0.4	0.68	0.57	0.37	0.42	0.42	0.47	0.29	0.52	0.57	0.33	0.48	0.47	0.5	0.41	0.34
NLRP3	0.64	0.62	0.67	0.66	0.71	0.6	0.58	0.72	0.75	1	0.72	0.63	0.71	0.54	0.69	0.53	0.64	0.48	0.68	0.5	0.58	0.57	0.53	0.71	0.49	0.51	0.53	0.62	0.52	0.49	0.48	0.45	0.5	0.48	0.53	0.44	0.36	0.42	0.48	0.33	0.34	0.45	0.48	0.36	0.3	0.49	0.38	0.36	0.33
IL7R	0.63	0.63	0.57	0.7	0.7	0.64	0.59	0.72	0.84	0.72	1	0.72	0.76	0.59	0.55	0.66	0.67	0.47	0.68	0.5	0.72	0.6	0.38	0.86	0.29	0.44	0.57	0.84	0.29	0.49	0.62	0.4	0.43	0.37	0.7	0.44	0.35	0.41	0.54	0.54	0.29	0.28	0.52	0.22	0.36	0.42	0.47	0.27	0.37
ELL2	0.63	0.62	0.54	0.67	0.7	0.57	0.59	0.64	0.68	0.63	0.72	1	0.65	0.49	0.64	0.56	0.64	0.63	0.56	0.49	0.66	0.6	0.44	0.59	0.36	0.45	0.59	0.53	0.41	0.48	0.53	0.33	0.63	0.58	0.49	0.53	0.45	0.5	0.42	0.45	0.4	0.38	0.49	0.24	0.34	0.57	0.46	0.45	0.28
RFTN1	0.62	0.69	0.62	0.72	0.68	0.54	0.66	0.74	0.78	0.71	0.76	0.65	1	0.45	0.56	0.65	0.66	0.46	0.72	0.45	0.67	0.64	0.41	0.73	0.47	0.47	0.56	0.72	0.41	0.39	0.54	0.48	0.59	0.4	0.64	0.6	0.29	0.39	0.51	0.44	0.23	0.39	0.51	0.24	0.47	0.45	0.5	0.25	0.51
GFRA1	0.62	0.52	0.59	0.57	0.72	0.5	0.55	0.65	0.63	0.54	0.59	0.49	0.45	1	0.62	0.48	0.61	0.51	0.39	0.41	0.4	0.45	0.6	0.57	0.37	0.56	0.46	0.51	0.39	0.54	0.4	0.33	0.33	0.45	0.43	0.36	0.38	0.44	0.28	0.33	0.39	0.37	0.42	0.24	0.22	0.37	0.38	0.38	0.32
SMURF2	0.61	0.61	0.69	0.63	0.81	0.56	0.6	0.68	0.6	0.69	0.55	0.64	0.56	0.62	1	0.44	0.68	0.54	0.49	0.53	0.48	0.57	0.63	0.45	0.53	0.63	0.52	0.3	0.51	0.65	0.33	0.26	0.54	0.75	0.32	0.59	0.47	0.49	0.31	0.23	0.57	0.5	0.4	0.41	0.15	0.65	0.37	0.44	0.25
GADD45B	0.6	0.71	0.57	0.7	0.58	0.58	0.51	0.65	0.64	0.53	0.66	0.56	0.65	0.48	0.44	1	0.5	0.57	0.59	0.46	0.64	0.51	0.4	0.67	0.31	0.44	0.41	0.65	0.45	0.4	0.43	0.56	0.42	0.23	0.55	0.4	0.23	0.31	0.42	0.33	0.31	0.4	0.42	0.2	0.52	0.29	0.35	0.23	0.3
ADAMTS6	0.6	0.6	0.67	0.72	0.77	0.52	0.67	0.71	0.72	0.64	0.67	0.64	0.66	0.61	0.68	0.5	1	0.57	0.63	0.46	0.59	0.57	0.5	0.57	0.42	0.56	0.61	0.52	0.42	0.55	0.45	0.47	0.48	0.48	0.45	0.57	0.36	0.49	0.37	0.37	0.26	0.54	0.47	0.33	0.4	0.51	0.43	0.49	0.25
HBEGF	0.59	0.67	0.57	0.6	0.63	0.58	0.68	0.58	0.56	0.48	0.47	0.63	0.46	0.51	0.54	0.57	0.57	1	0.46	0.43	0.49	0.46	0.47	0.41	0.54	0.52	0.46	0.35	0.54	0.51	0.26	0.33	0.43	0.42	0.31	0.55	0.42	0.49	0.27	0.36	0.45	0.51	0.42	0.45	0.34	0.46	0.38	0.53	0.16
TGM2	0.59	0.67	0.62	0.65	0.65	0.55	0.52	0.71	0.72	0.68	0.68	0.56	0.72	0.39	0.49	0.59	0.63	0.46	1	0.45	0.69	0.64	0.39	0.71	0.35	0.38	0.39	0.65	0.36	0.38	0.45	0.41	0.45	0.33	0.51	0.47	0.26	0.36	0.42	0.37	0.27	0.5	0.45	0.31	0.48	0.42	0.34	0.32	0.31
ANKRD1	0.59	0.57	0.46	0.51	0.56	0.42	0.51	0.46	0.53	0.5	0.5	0.49	0.45	0.41	0.53	0.46	0.46	0.43	0.45	1	0.41	0.42	0.3	0.43	0.34	0.52	0.3	0.4	0.4	0.43	0.36	0.3	0.29	0.33	0.34	0.33	0.28	0.38	0.28	0.41	0.33	0.4	0.34	0.34	0.2	0.28	0.25	0.33	0.18
AOX1	0.57	0.66	0.58	0.64	0.65	0.56	0.52	0.62	0.63	0.58	0.72	0.66	0.67	0.4	0.48	0.64	0.59	0.49	0.69	0.41	1	0.65	0.38	0.61	0.36	0.37	0.41	0.58	0.29	0.41	0.53	0.47	0.5	0.45	0.46	0.43	0.37	0.43	0.44	0.47	0.26	0.35	0.42	0.25	0.37	0.4	0.33	0.26	0.29
EPAS1	0.56	0.69	0.6	0.58	0.66	0.49	0.59	0.62	0.61	0.57	0.6	0.6	0.64	0.45	0.57	0.51	0.57	0.46	0.64	0.42	0.65	1	0.47	0.57	0.42	0.51	0.27	0.48	0.35	0.52	0.45	0.38	0.66	0.61	0.45	0.51	0.34	0.38	0.41	0.26	0.42	0.32	0.41	0.24	0.41	0.6	0.46	0.36	0.32
CNN3	0.56	0.53	0.64	0.55	0.65	0.51	0.53	0.5	0.46	0.53	0.38	0.44	0.41	0.6	0.63	0.4	0.5	0.47	0.39	0.3	0.38	0.47	1	0.33	0.43	0.5	0.28	0.21	0.42	0.58	0.26	0.31	0.46	0.63	0.27	0.53	0.4	0.43	0.24	0.12	0.46	0.35	0.3	0.32	0.26	0.54	0.25	0.52	0.23
ITGB2	0.56	0.59	0.46	0.64	0.63	0.51	0.55	0.69	0.86	0.71	0.86	0.59	0.73	0.57	0.45	0.67	0.57	0.41	0.71	0.43	0.61	0.57	0.33	1	0.16	0.42	0.46	0.93	0.19	0.43	0.52	0.41	0.38	0.23	0.77	0.39	0.2	0.3	0.39	0.42	0.19	0.28	0.44	0.2	0.4	0.33	0.51	0.28	0.38
FJX1	0.55	0.53	0.59	0.43	0.56	0.42	0.47	0.53	0.38	0.49	0.29	0.36	0.47	0.37	0.53	0.31	0.42	0.54	0.35	0.34	0.36	0.42	0.43	0.16	1	0.49	0.42	0.13	0.63	0.42	0.17	0.32	0.38	0.47	0.19	0.43	0.34	0.37	0.31	0.12	0.35	0.39	0.39	0.34	0.17	0.4	0.14	0.22	0.26
OXTR	0.54	0.59	0.49	0.54	0.67	0.49	0.58	0.53	0.58	0.51	0.44	0.45	0.47	0.56	0.63	0.44	0.56	0.52	0.38	0.52	0.37	0.51	0.5	0.42	0.49	1	0.41	0.34	0.42	0.64	0.24	0.31	0.36	0.45	0.31	0.48	0.41	0.35	0.16	0.18	0.44	0.55	0.44	0.3	0.31	0.39	0.32	0.41	0.31
IL12A	0.53	0.44	0.42	0.46	0.59	0.39	0.54	0.58	0.61	0.53	0.57	0.59	0.56	0.46	0.52	0.41	0.61	0.46	0.39	0.3	0.41	0.27	0.28	0.46	0.42	0.41	1	0.48	0.43	0.32	0.28	0.21	0.33	0.28	0.39	0.43	0.35	0.32	0.3	0.34	0.28	0.35	0.51	0.19	0.34	0.29	0.27	0.25	0.31
GNGT2	0.52	0.53	0.39	0.56	0.54	0.48	0.49	0.66	0.8	0.62	0.84	0.53	0.72	0.51	0.3	0.65	0.52	0.35	0.65	0.4	0.58	0.48	0.21	0.93	0.13	0.34	0.48	1	0.18	0.3	0.54	0.42	0.3	0.07	0.74	0.29	0.17	0.25	0.43	0.48	0.12	0.25	0.44	0.13	0.46	0.17	0.46	0.19	0.45
IL11	0.51	0.49	0.6	0.33	0.5	0.46	0.44	0.59	0.36	0.52	0.29	0.41	0.41	0.39	0.51	0.45	0.42	0.54	0.36	0.4	0.29	0.35	0.42	0.19	0.63	0.42	0.43	0.18	1	0.26	0.17	0.28	0.4	0.36	0.23	0.4	0.22	0.32	0.42	0.17	0.37	0.45	0.45	0.35	0.22	0.28	0.11	0.3	0.31
DLC1	0.51	0.49	0.52	0.58	0.69	0.5	0.58	0.5	0.55	0.49	0.49	0.48	0.39	0.54	0.65	0.4	0.55	0.51	0.38	0.43	0.41	0.52	0.58	0.43	0.42	0.64	0.32	0.3	0.26	1	0.23	0.2	0.33	0.64	0.23	0.42	0.47	0.38	0.16	0.25	0.54	0.43	0.38	0.41	0.18	0.61	0.35	0.45	0.12
MPP7	0.5	0.42	0.42	0.56	0.45	0.51	0.34	0.33	0.49	0.48	0.62	0.53	0.54	0.4	0.33	0.43	0.45	0.26	0.45	0.36	0.53	0.45	0.26	0.52	0.17	0.24	0.28	0.54	0.17	0.23	1	0.41	0.41	0.35	0.61	0.2	0.26	0.28	0.59	0.61	0.17	0.14	0.43	0.21	0.23	0.29	0.44	0.18	0.24
MFAP5	0.49	0.47	0.59	0.64	0.4	0.52	0.42	0.38	0.4	0.45	0.4	0.33	0.48	0.33	0.26	0.56	0.47	0.33	0.41	0.3	0.47	0.38	0.31	0.41	0.32	0.31	0.21	0.42	0.28	0.2	0.41	1	0.3	0.13	0.25	0.25	0.17	0.19	0.38	0.16	0.1	0.21	0.2	0.16	0.44	0.12	0.21	0.19	0.28
SGMS2	0.47	0.56	0.49	0.54	0.53	0.37	0.48	0.5	0.46	0.5	0.43	0.63	0.59	0.33	0.54	0.42	0.48	0.43	0.45	0.29	0.5	0.66	0.46	0.38	0.38	0.36	0.33	0.3	0.4	0.33	0.41	0.3	1	0.61	0.33	0.54	0.45	0.29	0.43	0.31	0.35	0.32	0.5	0.08	0.2	0.6	0.3	0.25	0.36
WWC2	0.47	0.48	0.49	0.48	0.59	0.39	0.46	0.4	0.4	0.48	0.37	0.58	0.4	0.45	0.75	0.23	0.48	0.42	0.33	0.33	0.45	0.61	0.63	0.23	0.47	0.45	0.28	0.07	0.36	0.64	0.35	0.13	0.61	1	0.18	0.54	0.4	0.42	0.24	0.21	0.55	0.29	0.32	0.32	0.02	0.78	0.28	0.45	0.15
NUAK2	0.47	0.5	0.32	0.45	0.47	0.37	0.38	0.53	0.68	0.53	0.7	0.49	0.64	0.43	0.32	0.55	0.45	0.31	0.51	0.34	0.46	0.45	0.27	0.77	0.19	0.31	0.39	0.74	0.23	0.23	0.61	0.25	0.33	0.18	1	0.35	0.05	0.28	0.48	0.48	0.01	0.18	0.33	0.21	0.3	0.26	0.54	0.24	0.38
MB21D2	0.46	0.62	0.53	0.56	0.61	0.36	0.61	0.6	0.57	0.44	0.44	0.53	0.6	0.36	0.59	0.4	0.57	0.55	0.47	0.33	0.43	0.51	0.53	0.39	0.43	0.48	0.43	0.29	0.4	0.42	0.2	0.25	0.54	0.54	0.35	1	0.41	0.43	0.18	0.26	0.27	0.41	0.41	0.36	0.28	0.54	0.43	0.41	0.44
PAWR	0.46	0.45	0.46	0.45	0.48	0.49	0.48	0.35	0.37	0.36	0.35	0.45	0.29	0.38	0.47	0.23	0.36	0.42	0.26	0.28	0.37	0.34	0.4	0.2	0.34	0.41	0.35	0.17	0.22	0.47	0.26	0.17	0.45	0.4	0.05	0.41	1	0.15	0.18	0.3	0.4	0.33	0.41	0.25	0.07	0.31	0.19	0.21	0.24
MPP4	0.46	0.47	0.5	0.46	0.56	0.33	0.49	0.46	0.42	0.42	0.41	0.5	0.39	0.44	0.49	0.31	0.49	0.49	0.36	0.38	0.43	0.38	0.43	0.3	0.37	0.35	0.32	0.25	0.32	0.38	0.28	0.19	0.29	0.42	0.28	0.43	0.15	1	0.2	0.31	0.33	0.25	0.3	0.31	0.13	0.42	0.5	0.44	0.17
LAMC2	0.45	0.45	0.5	0.48	0.36	0.5	0.33	0.4	0.42	0.48	0.54	0.42	0.51	0.28	0.31	0.42	0.37	0.27	0.42	0.28	0.44	0.41	0.24	0.39	0.31	0.16	0.3	0.43	0.42	0.16	0.59	0.38	0.43	0.24	0.48	0.18	0.18	0.2	1	0.51	0.06	0.19	0.35	0.09	0.23	0.31	0.15	0.13	0.26
PKP2	0.45	0.39	0.27	0.46	0.37	0.43	0.36	0.3	0.47	0.33	0.54	0.45	0.44	0.33	0.23	0.33	0.37	0.36	0.37	0.41	0.47	0.26	0.12	0.42	0.12	0.18	0.34	0.48	0.17	0.25	0.61	0.16	0.31	0.21	0.48	0.26	0.3	0.31	0.51	1	0.05	0.2	0.37	0.17	0.18	0.22	0.41	0.17	0.27
GADD45A	0.44	0.34	0.44	0.35	0.47	0.43	0.37	0.39	0.29	0.34	0.29	0.4	0.23	0.39	0.57	0.31	0.26	0.45	0.27	0.33	0.26	0.42	0.46	0.19	0.35	0.44	0.28	0.12	0.37	0.54	0.17	0.1	0.35	0.55	0.01	0.27	0.4	0.33	0.06	0.05	1	0.24	0.31	0.36	0.13	0.34	0.17	0.36	0.04
ESM1	0.41	0.49	0.49	0.48	0.51	0.31	0.52	0.52	0.52	0.45	0.28	0.38	0.39	0.37	0.5	0.4	0.54	0.51	0.5	0.4	0.35	0.32	0.35	0.28	0.39	0.55	0.35	0.25	0.45	0.43	0.14	0.21	0.32	0.29	0.18	0.41	0.33	0.25	0.19	0.2	0.24	1	0.33	0.3	0.49	0.3	0.12	0.33	0.07
C12orf75	0.39	0.4	0.48	0.47	0.58	0.35	0.43	0.52	0.57	0.48	0.52	0.49	0.51	0.42	0.4	0.42	0.47	0.42	0.45	0.34	0.42	0.41	0.3	0.44	0.39	0.44	0.51	0.44	0.45	0.38	0.43	0.2	0.5	0.32	0.33	0.41	0.41	0.3	0.35	0.37	0.31	0.33	1	0.14	0.17	0.38	0.3	0.16	0.33
EPHA2	0.37	0.35	0.4	0.34	0.41	0.37	0.41	0.28	0.33	0.36	0.22	0.24	0.24	0.24	0.41	0.2	0.33	0.45	0.31	0.34	0.25	0.24	0.32	0.2	0.34	0.3	0.19	0.13	0.35	0.41	0.21	0.16	0.08	0.32	0.21	0.36	0.25	0.31	0.09	0.17	0.36	0.3	0.14	1	0.08	0.24	0.22	0.41	-0.01
SFTA1P	0.37	0.47	0.33	0.48	0.33	0.35	0.45	0.41	0.48	0.3	0.36	0.34	0.47	0.22	0.15	0.52	0.4	0.34	0.48	0.2	0.37	0.41	0.26	0.4	0.17	0.31	0.34	0.46	0.22	0.18	0.23	0.44	0.2	0.02	0.3	0.28	0.07	0.13	0.23	0.18	0.13	0.49	0.17	0.08	1	0.11	0.22	0.35	0.21
RAPH1	0.35	0.47	0.44	0.5	0.53	0.36	0.43	0.4	0.47	0.49	0.42	0.57	0.45	0.37	0.65	0.29	0.51	0.46	0.42	0.28	0.4	0.6	0.54	0.33	0.4	0.39	0.29	0.17	0.28	0.61	0.29	0.12	0.6	0.78	0.26	0.54	0.31	0.42	0.31	0.22	0.34	0.3	0.38	0.24	0.11	1	0.34	0.41	0.15
ADRB2	0.35	0.39	0.26	0.38	0.5	0.35	0.41	0.43	0.5	0.38	0.47	0.46	0.5	0.38	0.37	0.35	0.43	0.38	0.34	0.25	0.33	0.46	0.25	0.51	0.14	0.32	0.27	0.46	0.11	0.35	0.44	0.21	0.3	0.28	0.54	0.43	0.19	0.5	0.15	0.41	0.17	0.12	0.3	0.22	0.22	0.34	1	0.3	0.39
RAB3B	0.34	0.4	0.37	0.36	0.45	0.42	0.5	0.35	0.41	0.36	0.27	0.45	0.25	0.38	0.44	0.23	0.49	0.53	0.32	0.33	0.26	0.36	0.52	0.28	0.22	0.41	0.25	0.19	0.3	0.45	0.18	0.19	0.25	0.45	0.24	0.41	0.21	0.44	0.13	0.17	0.36	0.33	0.16	0.41	0.35	0.41	0.3	1	0.08
KRT81	0.34	0.43	0.29	0.25	0.35	0.31	0.32	0.49	0.34	0.33	0.37	0.28	0.51	0.32	0.25	0.3	0.25	0.16	0.31	0.18	0.29	0.32	0.23	0.38	0.26	0.31	0.31	0.45	0.31	0.12	0.24	0.28	0.36	0.15	0.38	0.44	0.24	0.17	0.26	0.27	0.04	0.07	0.33	-0.01	0.21	0.15	0.39	0.08	1
DKK1	0.32	0.37	0.35	0.27	0.34	0.23	0.36	0.43	0.26	0.3	0.22	0.36	0.44	0.23	0.36	0.23	0.33	0.36	0.33	0.33	0.31	0.2	0.28	0.18	0.37	0.31	0.23	0.17	0.43	0.01	0.18	0.15	0.45	0.24	0.28	0.4	0.1	0.29	0.28	0.21	0.12	0.26	0.24	0.07	0.06	0.2	0.09	0.22	0.34
KRT80	0.3	0.32	0.42	0.23	0.24	0.34	0.17	0.41	0.12	0.32	0.18	0.34	0.27	0.11	0.26	0.26	0.14	0.28	0.25	0.11	0.21	0.17	0.25	0.12	0.29	0.08	0.18	0.15	0.53	-0.01	0.16	0.3	0.45	0.17	0.15	0.36	0.22	0.18	0.43	0.12	0.13	0.1	0.3	0.09	0.02	0.19	0.07	0.13	0.49
CLDN1	0.3	0.32	0.38	0.32	0.32	0.37	0.43	0.22	0.29	0.22	0.23	0.24	0.34	0.16	0.21	0.14	0.35	0.25	0.24	0.16	0.27	0.22	0.37	0.18	0.17	0.27	0.15	0.19	0.12	0.29	0.24	0.25	0.2	0.18	0.28	0.29	0.35	0.12	0.35	0.22	-0.04	0.31	0.13	0.22	0.28	0.21	0.21	0.33	0.2
NAV3	0.29	0.25	0.24	0.37	0.35	0.18	0.28	0.25	0.33	0.32	0.23	0.47	0.34	0.21	0.46	0.27	0.28	0.24	0.17	0.2	0.29	0.34	0.31	0.21	0.32	0.31	0.29	0.1	0.3	0.37	0.27	0.12	0.57	0.6	0.2	0.32	0.2	0.18	0.23	0.18	0.35	0.2	0.31	0.09	0.06	0.48	0.09	0.21	0.1
CPA4	0.29	0.2	0.31	0.18	0.25	0.32	0.1	0.25	0.15	0.32	0.29	0.37	0.2	0.3	0.28	0.32	0.05	0.21	0.16	0.24	0.22	0.16	0.16	0.25	0.11	0.07	0.22	0.24	0.39	-0.01	0.34	0.2	0.17	0.14	0.26	0	0.06	0.21	0.37	0.11	0.28	0.01	0.15	0.05	0.03	0.11	0.21	0.18	0.19
ANLN	0.29	0.42	0.39	0.39	0.38	0.4	0.37	0.33	0.4	0.46	0.28	0.43	0.34	0.3	0.45	0.28	0.35	0.4	0.33	0.2	0.35	0.41	0.56	0.21	0.39	0.39	0.18	0.13	0.37	0.42	0.26	0.16	0.57	0.56	0.16	0.35	0.46	0.2	0.29	0.15	0.28	0.31	0.38	0.21	0.05	0.54	0.07	0.35	0.17
RGS7	0.28	0.37	0.16	0.35	0.34	0.16	0.34	0.34	0.52	0.41	0.53	0.38	0.49	0.24	0.3	0.25	0.39	0.2	0.42	0.3	0.38	0.38	0.14	0.45	0.14	0.29	0.39	0.47	0.1	0.16	0.47	0.08	0.29	0.25	0.46	0.32	0.15	0.32	0.45	0.6	0.04	0.16	0.38	0.1	0.16	0.36	0.27	0.09	0.25
ETS1	0.27	0.41	0.33	0.5	0.41	0.3	0.4	0.28	0.52	0.45	0.41	0.49	0.46	0.25	0.42	0.33	0.36	0.34	0.34	0.35	0.36	0.5	0.45	0.41	0.25	0.34	0.12	0.28	0.14	0.47	0.36	0.18	0.56	0.58	0.38	0.49	0.3	0.3	0.32	0.33	0.2	0.21	0.44	0.16	0.06	0.66	0.35	0.31	0.15
ACAT2	0.27	0.26	0.14	0.19	0.21	0.21	0.2	0.16	0.22	0.32	0.17	0.31	0.19	0.22	0.32	0.12	0.16	0.22	0.11	0.25	0.14	0.12	0.28	0.12	0.3	0.26	0.18	0.05	0.25	0.24	0.17	-0.03	0.37	0.32	0.16	0.2	0.38	0.09	0.13	0.22	0.18	0.19	0.22	0.16	-0.04	0.32	0.1	0.08	0.09
DIAPH3	0.26	0.37	0.34	0.37	0.38	0.34	0.41	0.23	0.34	0.37	0.2	0.41	0.27	0.23	0.46	0.13	0.39	0.39	0.16	0.24	0.31	0.32	0.39	0.1	0.43	0.33	0.2	-0.01	0.23	0.42	0.19	0.1	0.42	0.56	0.1	0.27	0.42	0.23	0.19	0.09	0.19	0.32	0.16	0.31	0.04	0.5	0.11	0.47	-0.05
TNFAIP3	0.24	0.38	0.27	0.31	0.27	0.29	0.21	0.32	0.46	0.43	0.45	0.3	0.47	0.15	0.21	0.32	0.19	0.03	0.45	0.28	0.33	0.34	0.19	0.42	0.17	0.17	0.12	0.4	0.25	0	0.38	0.12	0.37	0.12	0.4	0.19	0.17	0.14	0.46	0.33	-0.04	0.17	0.36	-0.05	0.16	0.26	0.16	-0.07	0.24
LETM2	0.23	0.27	0.47	0.35	0.48	0.33	0.27	0.37	0.31	0.42	0.24	0.28	0.26	0.23	0.51	0.18	0.42	0.35	0.29	0.29	0.28	0.33	0.35	0.17	0.37	0.38	0.24	0.07	0.3	0.47	0.12	0.15	0.38	0.45	0.06	0.37	0.25	0.34	0.16	0.23	0.34	0.31	0.37	0.18	-0.04	0.43	0.16	0.25	0.1
ZNF367	0.22	0.31	0.28	0.29	0.31	0.2	0.2	0.19	0.22	0.35	0.18	0.41	0.25	0.23	0.44	0.12	0.22	0.21	0.19	0.18	0.26	0.43	0.44	0.14	0.26	0.24	0.11	0.03	0.14	0.34	0.3	0.01	0.62	0.6	0.12	0.32	0.48	0.11	0.15	0.11	0.28	0.16	0.31	0.1	-0.11	0.58	0.11	0.15	0.14
CEP55	0.22	0.41	0.3	0.34	0.33	0.23	0.31	0.34	0.39	0.44	0.27	0.42	0.42	0.2	0.36	0.33	0.27	0.33	0.34	0.25	0.33	0.34	0.37	0.28	0.37	0.29	0.19	0.23	0.33	0.19	0.26	0.18	0.56	0.4	0.29	0.32	0.34	0.14	0.2	0.08	0.17	0.23	0.43	0.12	0.06	0.42	0.1	0.21	0.26
TUBB6	0.21	0.31	0.38	0.21	0.29	0.25	0.21	0.37	0.22	0.33	0.21	0.32	0.33	0.17	0.29	0.26	0.18	0.37	0.28	0.14	0.2	0.34	0.27	0.14	0.43	0.2	0.16	0.14	0.46	0.17	0.15	0.12	0.52	0.28	0.21	0.28	0.29	0.18	0.35	0.05	0.25	0.18	0.53	0.12	0.09	0.38	0.13	0.11	0.27
ANXA2	0.21	0.26	0.33	0.26	0.29	0.17	0.15	0.35	0.19	0.26	0.21	0.29	0.25	0.12	0.27	0.32	0.11	0.25	0.23	0.13	0.1	0.25	0.24	0.2	0.21	0.13	0.14	0.17	0.32	0.13	0.13	0.12	0.48	0.18	0.17	0.28	0.2	0.25	0.21	0.06	0.28	0.12	0.43	0.06	0.12	0.27	0.18	0.02	0.24
FOSL1	0.19	0.19	0.25	0.1	0.15	0.18	0.01	0.34	0.06	0.26	0.11	0.21	0.15	0.11	0.24	0.26	0.02	0.17	0.13	0.11	0.11	0.05	0.17	0.04	0.31	0.06	0.17	0.07	0.56	-0.06	0.13	0.03	0.32	0.13	0.12	0.16	0.19	0.04	0.29	0.03	0.17	0.12	0.35	0.15	-0.06	0.1	-0.03	-0.04	0.3
NPPB	0.18	0.25	0.11	0.2	0.21	0.07	0.31	0.17	0.22	0.13	0.13	0.2	0.19	0.11	0.24	0.03	0.17	0.12	0.09	0.27	0.06	0.21	0.18	0.08	0.2	0.23	0.11	0.03	0.13	0.32	0.03	-0.06	0.18	0.23	0.19	0.25	0.27	0.17	0	0.07	0.06	0.2	0.06	0.23	0.06	0.21	0.14	0.1	0.21
EPB41L4B	0.16	0.22	0.2	0.28	0.28	0.21	0.33	0.15	0.19	0.15	0.06	0.21	0.22	0.2	0.16	0.06	0.31	0.37	0.12	0.09	0.14	0.17	0.24	0.01	0.28	0.23	0.13	0.04	0.2	0.24	0.29	0.19	0.2	0.29	0.17	0.37	0.18	0.32	0.22	0.36	0.07	0.18	0.16	0.38	0.15	0.31	0.3	0.41	0.13
ABL2	0.15	0.29	0.21	0.23	0.21	0.11	0.2	0.21	0.17	0.19	0.09	0.34	0.23	-0.02	0.36	0.2	0.22	0.29	0.18	0.19	0.18	0.29	0.31	0.04	0.3	0.24	0.15	-0.08	0.26	0.24	0.06	-0.02	0.58	0.47	0.12	0.45	0.22	0.21	0.15	0.07	0.21	0.18	0.23	-0.01	0	0.55	0.15	0.19	0.18
FSTL3	0.13	0.17	0.24	0.08	0.15	0.01	0.13	0.31	0.08	0.1	0.07	0.14	0.16	0.01	0.08	0.17	0.08	0.2	0.28	0.07	0.06	0.26	0.04	0.1	0.14	0.1	-0.01	0.09	0.34	0.07	-0.08	0.04	0.23	0.06	0.07	0.27	0.04	0.11	0.07	0.03	0.11	0.18	0.31	0.04	0.16	0.11	0.02	0.07	0.2
WWC1	0.06	0.22	0.1	0.16	0.15	0.06	0.28	0.12	0.22	0.05	0.1	0.16	0.09	0.15	0.1	0.17	0.09	0.32	-0.02	0.11	0.05	0.18	0.1	0.12	0.15	0.31	0.11	0.15	0.19	0.23	0.14	0.08	0.2	0.13	0.18	0.3	0.3	0.18	0.14	0.25	0.11	0.17	0.39	0.23	-0.02	0.19	0.29	0.15	0.25
TEAD4	0.05	0.2	0.12	0.02	0.02	-0.07	0.1	0.11	0.01	0.06	-0.04	0.09	0.12	-0.12	0.05	0.17	-0.12	0.17	0	-0.01	0.06	0.27	0.08	-0.04	0.36	0	-0.03	-0.08	0.27	-0.01	-0.06	-0.04	0.35	0.19	0.08	0.19	0.11	0.09	0.12	-0.05	0.07	-0.03	0.27	0	-0.02	0.27	0.13	0.01	0.14
PRKAG2	0.04	0.24	0.12	0.2	0.2	0.08	0.16	0.21	0.28	0.3	0.33	0.26	0.35	0.05	0.15	0.16	0.1	0	0.31	0.18	0.37	0.43	0.12	0.29	0.03	0.05	0	0.24	0.08	0.05	0.36	0.01	0.46	0.27	0.27	0.33	0.17	0.21	0.28	0.26	0.15	-0.05	0.34	0.03	-0.02	0.28	0.25	-0.03	0.19
EPG5	0.02	0.1	0.06	0.11	0.03	0.06	-0.02	-0.05	0.11	0.26	0.08	0.15	0.15	-0.1	0.23	0	0.01	-0.08	0.15	0.09	0.1	0.32	0.16	0.09	0.12	0.05	-0.08	-0.05	0.01	0.1	0.23	-0.04	0.47	0.41	0.09	0.08	0.12	-0.1	0.27	0.01	0.07	-0.05	0.15	-0.04	-0.14	0.49	0	-0.04	-0.03
CYTH3	-0.02	0.02	0.1	0.07	-0.04	-0.02	-0.06	-0.13	-0.01	0.08	-0.12	0.01	-0.06	-0.08	0.08	-0.08	-0.03	-0.05	0.04	-0.05	0.01	0.19	0.22	-0.12	0.12	0	-0.13	-0.22	0	0.22	0	-0.07	0.3	0.35	-0.1	0.03	0.16	-0.07	0.12	-0.04	0.02	0.04	0.07	0.01	-0.08	0.43	-0.18	0.04	-0.03
TK1	-0.03	0.13	0.05	0	-0.09	0	0.04	-0.04	0.05	0.07	-0.1	-0.03	0.03	-0.19	-0.02	0.06	-0.09	0.04	0.08	0.08	0	0.09	0.04	0.01	0.06	-0.11	-0.07	0.01	0.07	-0.05	0.01	0.04	0.17	0	0.08	0.04	0.06	-0.11	0.06	0.06	-0.12	0.01	0.06	0.12	0.03	0.09	-0.04	0.1	0.05
PCLO	-0.04	0.09	-0.05	-0.06	-0.05	-0.1	-0.1	0.08	-0.05	-0.02	0	0.08	0.02	-0.13	-0.06	0.12	-0.01	0.02	0.08	0.09	0.16	0.05	-0.1	-0.05	-0.06	-0.04	0.16	-0.02	0.02	-0.24	-0.06	-0.01	0.17	-0.12	-0.01	0.17	0.2	-0.07	-0.08	0.06	-0.13	0.05	0.09	-0.18	-0.03	-0.1	-0.11	-0.17	0.12
RNF144B	-0.06	0.14	-0.04	0.1	0.03	-0.02	0.05	0.07	0.2	0.14	0.19	0.24	0.19	-0.09	0.06	0.07	0.1	0.04	0.13	0.03	0.18	0.21	0.1	0.2	-0.14	0	-0.06	0.11	-0.07	0	0.19	-0.13	0.37	0.15	0.28	0.31	0.02	0.21	0.16	0.19	-0.07	0.01	0.16	-0.09	0.03	0.32	0.28	0.09	0.11
PKD1L2	-0.25	-0.16	-0.38	-0.26	-0.25	-0.23	-0.24	-0.3	-0.21	-0.24	-0.19	-0.12	-0.26	-0.3	-0.16	-0.22	-0.25	-0.29	-0.17	-0.09	-0.03	-0.02	-0.16	-0.13	-0.28	-0.18	-0.25	-0.19	-0.33	-0.08	-0.07	-0.19	0.03	0.06	-0.16	-0.17	0.02	-0.28	-0.22	-0.1	-0.12	-0.17	-0.27	-0.18	-0.13	-0.04	-0.21	-0.07	-0.06
SH2D5	-0.26	-0.11	-0.3	-0.25	-0.33	-0.21	-0.21	-0.27	-0.27	-0.21	-0.29	0.03	-0.23	-0.48	-0.19	-0.16	-0.26	-0.01	-0.16	-0.17	-0.11	-0.05	-0.32	-0.32	-0.04	-0.26	-0.15	-0.35	0.04	-0.27	-0.1	-0.21	0.15	0	-0.13	0	-0.03	-0.28	-0.03	-0.04	-0.09	-0.14	-0.06	-0.02	-0.16	0.03	-0.11	-0.04	-0.06
[truncated: 31 more columns]

## Sheet: Tab 7-Similarity CYR61 H v L
id	CYR61	CTGF	VGLL3	DDAH1	GADD45B	CRIM1	EPAS1	RFTN1	F3	AOX1	SLC8A1	AXL	MB21D2	ELL2	HBEGF	NLRP3	IL7R	TGM2	COL12A1	OXTR	ANKRD1	ITGB2	ADAMTS6	SGMS2	SMURF2	FJX1	GFRA1	NUAK2	MFAP5	ADRB2	GNGT2	WWC2	ETS1	RAPH1	CNN3	KRT81	TNFAIP3	SFTA1P	MPP4	MPP7	DLC1	LAMC2	PAWR	IL12A	IL11	CEP55	KRT80	PRKAG2	PKP2
CYR61	1	0.83	0.73	0.71	0.7	0.67	0.66	0.64	0.64	0.63	0.62	0.62	0.62	0.6	0.6	0.6	0.6	0.59	0.58	0.57	0.56	0.56	0.52	0.51	0.5	0.5	0.49	0.49	0.48	0.48	0.47	0.47	0.45	0.45	0.44	0.44	0.43	0.43	0.41	0.41	0.4	0.4	0.39	0.39	0.38	0.38	0.36	0.36	0.36
CTGF	0.83	1	0.74	0.7	0.7	0.74	0.68	0.64	0.73	0.65	0.67	0.67	0.55	0.66	0.64	0.65	0.6	0.62	0.67	0.63	0.55	0.57	0.62	0.52	0.59	0.53	0.58	0.53	0.52	0.36	0.49	0.48	0.38	0.43	0.54	0.39	0.32	0.46	0.36	0.47	0.46	0.42	0.41	0.48	0.51	0.35	0.3	0.13	0.34
VGLL3	0.73	0.74	1	0.71	0.74	0.7	0.66	0.71	0.67	0.67	0.72	0.65	0.58	0.68	0.61	0.63	0.7	0.6	0.74	0.61	0.4	0.64	0.65	0.58	0.53	0.46	0.51	0.54	0.63	0.42	0.57	0.43	0.52	0.51	0.51	0.37	0.4	0.58	0.36	0.49	0.46	0.51	0.43	0.42	0.35	0.45	0.39	0.32	0.36
DDAH1	0.71	0.7	0.71	1	0.58	0.68	0.59	0.59	0.55	0.58	0.65	0.61	0.57	0.6	0.71	0.49	0.59	0.47	0.53	0.6	0.4	0.51	0.66	0.45	0.48	0.39	0.48	0.41	0.37	0.4	0.46	0.39	0.38	0.43	0.47	0.33	0.27	0.46	0.35	0.29	0.43	0.39	0.48	0.47	0.4	0.39	0.24	0.18	0.34
GADD45B	0.7	0.7	0.74	0.58	1	0.6	0.55	0.69	0.58	0.67	0.69	0.72	0.49	0.57	0.54	0.6	0.7	0.65	0.51	0.49	0.49	0.72	0.57	0.33	0.36	0.38	0.47	0.62	0.47	0.37	0.69	0.19	0.31	0.26	0.35	0.44	0.42	0.55	0.29	0.39	0.28	0.35	0.23	0.48	0.42	0.38	0.27	0.21	0.26
CRIM1	0.67	0.74	0.7	0.68	0.6	1	0.64	0.57	0.6	0.63	0.71	0.76	0.56	0.74	0.74	0.63	0.64	0.56	0.62	0.72	0.48	0.57	0.67	0.45	0.7	0.51	0.62	0.47	0.4	0.39	0.49	0.53	0.4	0.5	0.54	0.33	0.19	0.38	0.44	0.4	0.61	0.41	0.41	0.6	0.48	0.4	0.26	0.21	0.34
EPAS1	0.66	0.68	0.66	0.59	0.55	0.64	1	0.63	0.56	0.69	0.63	0.57	0.4	0.63	0.54	0.55	0.59	0.65	0.55	0.44	0.41	0.56	0.51	0.5	0.47	0.35	0.33	0.44	0.48	0.43	0.51	0.41	0.37	0.48	0.36	0.3	0.29	0.49	0.32	0.39	0.36	0.39	0.23	0.36	0.25	0.31	0.24	0.26	0.26
RFTN1	0.64	0.64	0.71	0.59	0.69	0.57	0.63	1	0.58	0.73	0.77	0.6	0.51	0.6	0.44	0.68	0.77	0.66	0.52	0.44	0.41	0.77	0.57	0.47	0.37	0.35	0.43	0.75	0.53	0.48	0.77	0.2	0.46	0.32	0.26	0.49	0.47	0.42	0.17	0.57	0.21	0.5	0.19	0.57	0.25	0.43	0.27	0.33	0.45
F3	0.64	0.73	0.67	0.55	0.58	0.6	0.56	0.58	1	0.57	0.54	0.55	0.46	0.64	0.56	0.65	0.64	0.6	0.62	0.48	0.48	0.49	0.53	0.44	0.49	0.37	0.5	0.41	0.57	0.26	0.43	0.41	0.35	0.38	0.41	0.33	0.31	0.46	0.23	0.53	0.41	0.53	0.37	0.43	0.43	0.34	0.31	0.22	0.34
AOX1	0.63	0.65	0.67	0.58	0.67	0.63	0.69	0.73	0.57	1	0.77	0.63	0.38	0.66	0.49	0.68	0.8	0.7	0.52	0.4	0.39	0.74	0.6	0.41	0.33	0.19	0.46	0.61	0.56	0.42	0.74	0.24	0.37	0.24	0.25	0.34	0.38	0.39	0.26	0.55	0.27	0.43	0.29	0.5	0.26	0.25	0.11	0.31	0.44
SLC8A1	0.62	0.67	0.72	0.65	0.69	0.71	0.63	0.77	0.54	0.77	1	0.76	0.55	0.66	0.56	0.71	0.8	0.73	0.48	0.53	0.41	0.87	0.64	0.42	0.43	0.31	0.52	0.75	0.42	0.43	0.81	0.23	0.42	0.33	0.33	0.32	0.42	0.49	0.28	0.53	0.38	0.39	0.28	0.62	0.32	0.41	0.14	0.29	0.45
AXL	0.62	0.67	0.65	0.61	0.72	0.76	0.57	0.6	0.55	0.63	0.76	1	0.56	0.62	0.63	0.69	0.64	0.65	0.58	0.54	0.36	0.65	0.65	0.45	0.62	0.49	0.52	0.49	0.35	0.27	0.59	0.33	0.31	0.44	0.45	0.42	0.25	0.41	0.35	0.3	0.51	0.41	0.35	0.57	0.56	0.42	0.41	0.16	0.28
MB21D2	0.62	0.55	0.58	0.57	0.49	0.56	0.4	0.51	0.46	0.38	0.55	0.56	1	0.52	0.6	0.41	0.43	0.42	0.44	0.51	0.33	0.4	0.48	0.53	0.47	0.53	0.39	0.39	0.27	0.46	0.32	0.49	0.55	0.55	0.49	0.38	0.25	0.29	0.35	0.26	0.49	0.29	0.45	0.37	0.37	0.43	0.36	0.32	0.4
ELL2	0.6	0.66	0.68	0.6	0.57	0.74	0.63	0.6	0.64	0.66	0.66	0.62	0.52	1	0.55	0.65	0.73	0.55	0.49	0.58	0.44	0.62	0.61	0.57	0.57	0.4	0.48	0.52	0.36	0.42	0.56	0.55	0.41	0.45	0.4	0.27	0.28	0.41	0.34	0.56	0.47	0.5	0.51	0.55	0.34	0.37	0.29	0.29	0.37
HBEGF	0.6	0.64	0.61	0.71	0.54	0.74	0.54	0.44	0.56	0.49	0.56	0.63	0.6	0.55	1	0.42	0.43	0.41	0.59	0.69	0.4	0.34	0.63	0.38	0.59	0.5	0.53	0.26	0.36	0.36	0.25	0.5	0.41	0.49	0.55	0.25	0.04	0.42	0.45	0.2	0.59	0.25	0.36	0.42	0.5	0.38	0.23	0.11	0.29
NLRP3	0.6	0.65	0.63	0.49	0.6	0.63	0.55	0.68	0.65	0.68	0.71	0.69	0.41	0.65	0.42	1	0.71	0.7	0.55	0.44	0.41	0.73	0.52	0.41	0.51	0.42	0.46	0.58	0.42	0.34	0.63	0.34	0.38	0.32	0.4	0.3	0.46	0.3	0.28	0.48	0.4	0.44	0.3	0.47	0.42	0.42	0.3	0.26	0.27
IL7R	0.6	0.6	0.7	0.59	0.7	0.64	0.59	0.77	0.64	0.8	0.8	0.64	0.43	0.73	0.43	0.71	1	0.66	0.44	0.42	0.41	0.86	0.63	0.39	0.38	0.16	0.57	0.74	0.45	0.43	0.84	0.24	0.38	0.28	0.27	0.39	0.49	0.33	0.22	0.63	0.33	0.54	0.33	0.55	0.23	0.32	0.2	0.34	0.46
TGM2	0.59	0.62	0.6	0.47	0.65	0.56	0.65	0.66	0.6	0.7	0.73	0.65	0.42	0.55	0.41	0.7	0.66	1	0.45	0.34	0.42	0.71	0.55	0.33	0.38	0.3	0.37	0.6	0.41	0.36	0.67	0.14	0.27	0.3	0.25	0.25	0.42	0.5	0.2	0.45	0.29	0.37	0.18	0.43	0.32	0.26	0.18	0.27	0.32
COL12A1	0.58	0.67	0.74	0.53	0.51	0.62	0.55	0.52	0.62	0.52	0.48	0.58	0.44	0.49	0.59	0.55	0.44	0.45	1	0.55	0.24	0.36	0.58	0.56	0.57	0.59	0.45	0.25	0.66	0.16	0.29	0.46	0.39	0.47	0.55	0.25	0.28	0.41	0.39	0.28	0.42	0.45	0.33	0.38	0.54	0.41	0.46	0.17	0.11
OXTR	0.57	0.63	0.61	0.6	0.49	0.72	0.44	0.44	0.48	0.4	0.53	0.54	0.51	0.58	0.69	0.44	0.42	0.34	0.55	1	0.51	0.35	0.55	0.4	0.61	0.5	0.56	0.33	0.31	0.34	0.27	0.52	0.32	0.44	0.48	0.29	0.08	0.37	0.41	0.31	0.56	0.25	0.36	0.44	0.46	0.33	0.16	0.12	0.25
ANKRD1	0.56	0.55	0.4	0.4	0.49	0.48	0.41	0.41	0.48	0.39	0.41	0.36	0.33	0.44	0.4	0.41	0.41	0.42	0.24	0.51	1	0.36	0.34	0.17	0.39	0.31	0.38	0.4	0.19	0.34	0.3	0.26	0.29	0.17	0.21	0.24	0.25	0.21	0.09	0.34	0.25	0.24	0.19	0.27	0.31	0.25	0.14	0.22	0.39
ITGB2	0.56	0.57	0.64	0.51	0.72	0.57	0.56	0.77	0.49	0.74	0.87	0.65	0.4	0.62	0.34	0.73	0.86	0.71	0.36	0.35	0.36	1	0.51	0.31	0.3	0.17	0.48	0.8	0.38	0.43	0.93	0.12	0.36	0.2	0.21	0.33	0.47	0.35	0.22	0.51	0.31	0.37	0.18	0.51	0.15	0.31	0.1	0.27	0.36
ADAMTS6	0.52	0.62	0.65	0.66	0.57	0.67	0.51	0.57	0.53	0.6	0.64	0.65	0.48	0.61	0.63	0.52	0.63	0.55	0.58	0.55	0.34	0.51	1	0.43	0.51	0.42	0.54	0.41	0.47	0.31	0.48	0.33	0.28	0.41	0.4	0.25	0.21	0.48	0.33	0.36	0.4	0.34	0.29	0.65	0.53	0.36	0.2	0.07	0.35
SGMS2	0.51	0.52	0.58	0.45	0.33	0.45	0.5	0.47	0.44	0.41	0.42	0.45	0.53	0.57	0.38	0.41	0.39	0.33	0.56	0.4	0.17	0.31	0.43	1	0.49	0.51	0.3	0.31	0.41	0.2	0.29	0.61	0.49	0.6	0.46	0.37	0.32	0.3	0.27	0.44	0.34	0.49	0.48	0.3	0.38	0.51	0.48	0.41	0.32
SMURF2	0.5	0.59	0.53	0.48	0.36	0.7	0.47	0.37	0.49	0.33	0.43	0.62	0.47	0.57	0.59	0.51	0.38	0.38	0.57	0.61	0.39	0.3	0.51	0.49	1	0.57	0.45	0.26	0.2	0.22	0.18	0.74	0.34	0.67	0.58	0.28	0.01	0.27	0.37	0.29	0.62	0.34	0.44	0.44	0.42	0.44	0.42	0.21	0.15
FJX1	0.5	0.53	0.46	0.39	0.38	0.51	0.35	0.35	0.37	0.19	0.31	0.49	0.53	0.4	0.5	0.42	0.16	0.3	0.59	0.5	0.31	0.17	0.42	0.51	0.57	1	0.29	0.15	0.26	0.1	0.09	0.56	0.33	0.52	0.47	0.24	0.23	0.32	0.35	0.09	0.43	0.28	0.32	0.38	0.58	0.46	0.38	0.07	0.12
GFRA1	0.49	0.58	0.51	0.48	0.47	0.62	0.33	0.43	0.5	0.46	0.52	0.52	0.39	0.48	0.53	0.46	0.57	0.37	0.45	0.56	0.38	0.48	0.54	0.3	0.45	0.29	1	0.42	0.36	0.37	0.42	0.43	0.35	0.34	0.44	0.29	0.22	0.13	0.28	0.51	0.43	0.4	0.33	0.37	0.42	0.26	0.15	0.14	0.42
NUAK2	0.49	0.53	0.54	0.41	0.62	0.47	0.44	0.75	0.41	0.61	0.75	0.49	0.39	0.52	0.26	0.58	0.74	0.6	0.25	0.33	0.4	0.8	0.41	0.31	0.26	0.15	0.42	1	0.29	0.44	0.79	0.1	0.36	0.14	0.19	0.35	0.47	0.25	0.18	0.62	0.09	0.47	0.06	0.47	0.21	0.37	0.16	0.34	0.45
MFAP5	0.48	0.52	0.63	0.37	0.47	0.4	0.48	0.53	0.57	0.56	0.42	0.35	0.27	0.36	0.36	0.42	0.45	0.41	0.66	0.31	0.19	0.38	0.47	0.41	0.2	0.26	0.36	0.29	1	0.29	0.41	0.2	0.3	0.18	0.26	0.3	0.23	0.38	0.26	0.4	0.23	0.35	0.13	0.19	0.22	0.18	0.19	0.2	0.22
ADRB2	0.48	0.36	0.42	0.4	0.37	0.39	0.43	0.48	0.26	0.42	0.43	0.27	0.46	0.42	0.36	0.34	0.43	0.36	0.16	0.34	0.34	0.43	0.31	0.2	0.22	0.1	0.37	0.44	0.29	1	0.42	0.29	0.39	0.25	0.19	0.36	0.16	0.19	0.36	0.39	0.27	0.12	0.21	0.24	-0.03	0.15	0.08	0.36	0.37
GNGT2	0.47	0.49	0.57	0.46	0.69	0.49	0.51	0.77	0.43	0.74	0.81	0.59	0.32	0.56	0.25	0.63	0.84	0.67	0.29	0.27	0.3	0.93	0.48	0.29	0.18	0.09	0.42	0.79	0.41	0.42	1	-0.01	0.28	0.08	0.08	0.38	0.44	0.35	0.11	0.57	0.18	0.39	0.14	0.51	0.09	0.28	0.09	0.25	0.38
WWC2	0.47	0.48	0.43	0.39	0.19	0.53	0.41	0.2	0.41	0.24	0.23	0.33	0.49	0.55	0.5	0.34	0.24	0.14	0.46	0.52	0.26	0.12	0.33	0.61	0.74	0.56	0.43	0.1	0.2	0.29	-0.01	1	0.51	0.76	0.65	0.22	0.02	0.14	0.41	0.28	0.62	0.25	0.46	0.21	0.32	0.37	0.37	0.26	0.19
ETS1	0.45	0.38	0.52	0.38	0.31	0.4	0.37	0.46	0.35	0.37	0.42	0.31	0.55	0.41	0.41	0.38	0.38	0.27	0.39	0.32	0.29	0.36	0.28	0.49	0.34	0.33	0.35	0.36	0.3	0.39	0.28	0.51	1	0.51	0.5	0.26	0.4	0.07	0.27	0.34	0.37	0.38	0.3	0.1	0.19	0.46	0.27	0.38	0.41
RAPH1	0.45	0.43	0.51	0.43	0.26	0.5	0.48	0.32	0.38	0.24	0.33	0.44	0.55	0.45	0.49	0.32	0.28	0.3	0.47	0.44	0.17	0.2	0.41	0.6	0.67	0.52	0.34	0.14	0.18	0.25	0.08	0.76	0.51	1	0.66	0.26	0.15	0.29	0.34	0.2	0.58	0.28	0.37	0.26	0.23	0.53	0.41	0.25	0.17
CNN3	0.44	0.54	0.51	0.47	0.35	0.54	0.36	0.26	0.41	0.25	0.33	0.45	0.49	0.4	0.55	0.4	0.27	0.25	0.55	0.48	0.21	0.21	0.4	0.46	0.58	0.47	0.44	0.19	0.26	0.19	0.08	0.65	0.5	0.66	1	0.21	0.12	0.21	0.38	0.18	0.59	0.21	0.37	0.15	0.39	0.48	0.38	0.13	0.1
KRT81	0.44	0.39	0.37	0.33	0.44	0.33	0.3	0.49	0.33	0.34	0.32	0.42	0.38	0.27	0.25	0.3	0.39	0.25	0.25	0.29	0.24	0.33	0.25	0.37	0.28	0.24	0.29	0.35	0.3	0.36	0.38	0.22	0.26	0.26	0.21	1	0.17	0.11	0.14	0.26	0.19	0.28	0.24	0.32	0.25	0.35	0.56	0.2	0.3
TNFAIP3	0.43	0.32	0.4	0.27	0.42	0.19	0.29	0.47	0.31	0.38	0.42	0.25	0.25	0.28	0.04	0.46	0.49	0.42	0.28	0.08	0.25	0.47	0.21	0.32	0.01	0.23	0.22	0.47	0.23	0.16	0.44	0.02	0.4	0.15	0.12	0.17	1	0.16	0.06	0.4	-0.16	0.46	0.16	0.1	0.24	0.42	0.2	0.35	0.22
SFTA1P	0.43	0.46	0.58	0.46	0.55	0.38	0.49	0.42	0.46	0.39	0.49	0.41	0.29	0.41	0.42	0.3	0.33	0.5	0.41	0.37	0.21	0.35	0.48	0.3	0.27	0.32	0.13	0.25	0.38	0.19	0.35	0.14	0.07	0.29	0.21	0.11	0.16	1	0.2	0.19	0.18	0.14	0.11	0.4	0.24	0.17	0.02	-0.01	0.13
MPP4	0.41	0.36	0.36	0.35	0.29	0.44	0.32	0.17	0.23	0.26	0.28	0.35	0.35	0.34	0.45	0.28	0.22	0.2	0.39	0.41	0.09	0.22	0.33	0.27	0.37	0.35	0.28	0.18	0.26	0.36	0.11	0.41	0.27	0.34	0.38	0.14	0.06	0.2	1	0.08	0.34	0.12	0.06	0.13	0.28	0.15	0.21	0.2	0.05
MPP7	0.41	0.47	0.49	0.29	0.39	0.4	0.39	0.57	0.53	0.55	0.53	0.3	0.26	0.56	0.2	0.48	0.63	0.45	0.28	0.31	0.34	0.51	0.36	0.44	0.29	0.09	0.51	0.62	0.4	0.39	0.57	0.28	0.34	0.2	0.18	0.26	0.4	0.19	0.08	1	0.11	0.58	0.3	0.36	0.13	0.35	0.22	0.55	0.58
DLC1	0.4	0.46	0.46	0.43	0.28	0.61	0.36	0.21	0.41	0.27	0.38	0.51	0.49	0.47	0.59	0.4	0.33	0.29	0.42	0.56	0.25	0.31	0.4	0.34	0.62	0.43	0.43	0.09	0.23	0.27	0.18	0.62	0.37	0.58	0.59	0.19	-0.16	0.18	0.34	0.11	1	0.12	0.45	0.28	0.23	0.22	0.21	0.02	0.17
LAMC2	0.4	0.42	0.51	0.39	0.35	0.41	0.39	0.5	0.53	0.43	0.39	0.41	0.29	0.5	0.25	0.44	0.54	0.37	0.45	0.25	0.24	0.37	0.34	0.49	0.34	0.28	0.4	0.47	0.35	0.12	0.39	0.25	0.38	0.28	0.21	0.28	0.46	0.14	0.12	0.58	0.12	1	0.27	0.32	0.4	0.34	0.46	0.38	0.47
PAWR	0.39	0.41	0.43	0.48	0.23	0.41	0.23	0.19	0.37	0.29	0.28	0.35	0.45	0.51	0.36	0.3	0.33	0.18	0.33	0.36	0.19	0.18	0.29	0.48	0.44	0.32	0.33	0.06	0.13	0.21	0.14	0.46	0.3	0.37	0.37	0.24	0.16	0.11	0.06	0.3	0.45	0.27	1	0.2	0.15	0.27	0.29	0.21	0.27
IL12A	0.39	0.48	0.42	0.47	0.48	0.6	0.36	0.57	0.43	0.5	0.62	0.57	0.37	0.55	0.42	0.47	0.55	0.43	0.38	0.44	0.27	0.51	0.65	0.3	0.44	0.38	0.37	0.47	0.19	0.24	0.51	0.21	0.1	0.26	0.15	0.32	0.1	0.4	0.13	0.36	0.28	0.32	0.2	1	0.42	0.35	0.2	0.04	0.29
IL11	0.38	0.51	0.35	0.4	0.42	0.48	0.25	0.25	0.43	0.26	0.32	0.56	0.37	0.34	0.5	0.42	0.23	0.32	0.54	0.46	0.31	0.15	0.53	0.38	0.42	0.58	0.42	0.21	0.22	-0.03	0.09	0.32	0.19	0.23	0.39	0.25	0.24	0.24	0.28	0.13	0.23	0.4	0.15	0.42	1	0.31	0.44	-0.03	0.17
CEP55	0.38	0.35	0.45	0.39	0.38	0.4	0.31	0.43	0.34	0.25	0.41	0.42	0.43	0.37	0.38	0.42	0.32	0.26	0.41	0.33	0.25	0.31	0.36	0.51	0.44	0.46	0.26	0.37	0.18	0.15	0.28	0.37	0.46	0.53	0.48	0.35	0.42	0.17	0.15	0.35	0.22	0.34	0.27	0.35	0.31	1	0.47	0.37	0.19
KRT80	0.36	0.3	0.39	0.24	0.27	0.26	0.24	0.27	0.31	0.11	0.14	0.41	0.36	0.29	0.23	0.3	0.2	0.18	0.46	0.16	0.14	0.1	0.2	0.48	0.42	0.38	0.15	0.16	0.19	0.08	0.09	0.37	0.27	0.41	0.38	0.56	0.2	0.02	0.21	0.22	0.21	0.46	0.29	0.2	0.44	0.47	1	0.35	0.17
PRKAG2	0.36	0.13	0.32	0.18	0.21	0.21	0.26	0.33	0.22	0.31	0.29	0.16	0.32	0.29	0.11	0.26	0.34	0.27	0.17	0.12	0.22	0.27	0.07	0.41	0.21	0.07	0.14	0.34	0.2	0.36	0.25	0.26	0.38	0.25	0.13	0.2	0.35	-0.01	0.2	0.55	0.02	0.38	0.21	0.04	-0.03	0.37	0.35	1	0.4
PKP2	0.36	0.34	0.36	0.34	0.26	0.34	0.26	0.45	0.34	0.44	0.45	0.28	0.4	0.37	0.29	0.27	0.46	0.32	0.11	0.25	0.39	0.36	0.35	0.32	0.15	0.12	0.42	0.45	0.22	0.37	0.38	0.19	0.41	0.17	0.1	0.3	0.22	0.13	0.05	0.58	0.17	0.47	0.27	0.29	0.17	0.19	0.17	0.4	1
ANXA2	0.34	0.19	0.29	0.18	0.23	0.28	0.24	0.24	0.1	0.07	0.13	0.34	0.34	0.21	0.17	0.18	0.17	0.07	0.38	0.18	0.08	0.14	0.1	0.47	0.29	0.39	0.12	0.19	0.14	0.2	0.12	0.33	0.31	0.35	0.28	0.3	0.29	0.02	0.38	0.05	0.16	0.21	0.13	0.07	0.26	0.45	0.54	0.36	0.03
GADD45A	0.32	0.37	0.33	0.38	0.29	0.43	0.34	0.17	0.42	0.27	0.31	0.4	0.34	0.48	0.45	0.3	0.28	0.26	0.37	0.45	0.24	0.24	0.34	0.36	0.49	0.32	0.28	0.05	0.19	0.18	0.16	0.53	0.17	0.34	0.36	0.04	-0.04	0.24	0.38	0.26	0.47	0.11	0.33	0.26	0.3	0.2	0.19	0.18	-0.01
ANLN	0.32	0.42	0.49	0.42	0.26	0.49	0.37	0.3	0.42	0.24	0.4	0.47	0.42	0.4	0.51	0.42	0.23	0.25	0.52	0.42	0.12	0.19	0.4	0.53	0.52	0.51	0.27	0.13	0.2	0.02	0.13	0.49	0.42	0.62	0.67	0.23	0.16	0.27	0.24	0.26	0.49	0.38	0.37	0.32	0.4	0.74	0.43	0.21	0.22
TUBB6	0.32	0.26	0.29	0.26	0.25	0.32	0.25	0.28	0.36	0.13	0.18	0.44	0.38	0.29	0.34	0.31	0.22	0.2	0.49	0.25	0.09	0.13	0.22	0.48	0.4	0.52	0.12	0.14	0.17	0.04	0.08	0.34	0.26	0.45	0.31	0.35	0.26	0.12	0.31	0.08	0.18	0.34	0.24	0.22	0.39	0.55	0.52	0.27	0.07
RGS7	0.31	0.31	0.3	0.28	0.35	0.28	0.25	0.45	0.21	0.44	0.55	0.39	0.3	0.34	0.08	0.37	0.53	0.46	0.07	0.13	0.19	0.53	0.37	0.2	0.07	0.05	0.3	0.54	0.09	0.23	0.55	-0.05	0.21	0.07	0.04	0.18	0.46	0.16	0.15	0.49	-0.02	0.41	0.05	0.36	0.15	0.13	0.08	0.27	0.57
ESM1	0.31	0.35	0.34	0.4	0.36	0.43	0.32	0.2	0.23	0.26	0.41	0.51	0.34	0.33	0.5	0.35	0.15	0.44	0.34	0.45	0.29	0.19	0.46	0.27	0.45	0.43	0.16	0.08	0.05	0.03	0.12	0.25	0.11	0.31	0.3	0.04	0.09	0.56	0.19	-0.04	0.38	0.04	0.26	0.32	0.49	0.14	0.1	-0.12	0.13
WWTR1	0.3	0.56	0.39	0.39	0.27	0.56	0.32	0.24	0.45	0.24	0.37	0.57	0.41	0.43	0.54	0.43	0.24	0.34	0.55	0.54	0.27	0.2	0.54	0.36	0.66	0.6	0.37	0.08	0.2	-0.05	0.07	0.48	0.12	0.55	0.58	0.12	-0.02	0.3	0.23	0.08	0.6	0.17	0.38	0.45	0.51	0.37	0.23	-0.15	0.09
ZNF367	0.3	0.29	0.36	0.23	0.13	0.35	0.29	0.25	0.27	0.14	0.23	0.27	0.44	0.39	0.25	0.35	0.2	0.09	0.33	0.31	0.15	0.15	0.2	0.59	0.51	0.43	0.23	0.14	0.07	0.14	0.06	0.59	0.48	0.63	0.54	0.25	0.27	0.01	0.14	0.35	0.38	0.29	0.49	0.19	0.14	0.72	0.42	0.37	0.18
C12orf75	0.29	0.34	0.46	0.33	0.42	0.54	0.25	0.44	0.3	0.37	0.49	0.5	0.44	0.4	0.39	0.35	0.45	0.28	0.49	0.4	0.14	0.38	0.44	0.45	0.32	0.42	0.42	0.4	0.19	0.18	0.41	0.2	0.4	0.3	0.31	0.41	0.35	0.15	0.17	0.36	0.22	0.41	0.31	0.56	0.44	0.52	0.36	0.22	0.33
DIAPH3	0.29	0.33	0.39	0.45	0.17	0.34	0.21	0.23	0.3	0.18	0.22	0.32	0.38	0.31	0.45	0.28	0.13	0.02	0.4	0.36	0.16	0.04	0.37	0.44	0.46	0.43	0.26	0.05	0.17	0.09	-0.05	0.5	0.46	0.51	0.55	0.15	0.12	0.2	0.17	0.12	0.43	0.22	0.4	0.21	0.33	0.65	0.27	0.07	0.13
RAB3B	0.29	0.38	0.37	0.35	0.18	0.39	0.31	0.22	0.41	0.26	0.31	0.28	0.33	0.33	0.48	0.23	0.22	0.23	0.38	0.39	0.13	0.2	0.4	0.24	0.46	0.23	0.33	0.18	0.3	0.21	0.08	0.45	0.32	0.41	0.44	0.05	-0.18	0.27	0.37	0.19	0.47	0.22	0.12	0.26	0.24	0.24	0.12	0.05	0.19
DKK1	0.28	0.39	0.31	0.33	0.33	0.27	0.15	0.34	0.23	0.11	0.18	0.35	0.36	0.26	0.3	0.27	0.22	0.11	0.32	0.27	0.28	0.17	0.26	0.37	0.32	0.44	0.19	0.3	0.07	0.03	0.18	0.21	0.25	0.29	0.36	0.28	0.27	0.01	0.22	0.14	0.11	0.36	0.14	0.16	0.36	0.47	0.41	0.05	0.18
EPHA2	0.26	0.38	0.33	0.36	0.24	0.42	0.19	0.15	0.36	0.22	0.3	0.34	0.41	0.29	0.49	0.3	0.21	0.26	0.35	0.36	0.26	0.17	0.3	0.13	0.46	0.32	0.22	0.2	0.11	0.08	0.08	0.31	0.14	0.19	0.35	0.06	-0.13	0.21	0.18	0.11	0.44	0.18	0.21	0.31	0.4	0.18	0.18	-0.05	0.05
RNF144B	0.25	0.04	0.21	0.15	0.03	0.1	0.14	0.28	0.03	0.18	0.18	0.02	0.34	0.23	0.02	0.14	0.24	0.1	0.06	0	0	0.21	0.05	0.38	0.09	0.06	0.06	0.31	0.02	0.31	0.18	0.27	0.55	0.3	0.15	0.14	0.38	-0.11	0.22	0.26	-0.02	0.29	0.18	-0.07	-0.07	0.23	0.24	0.56	0.28
NPPB	0.23	0.21	0.16	0.23	0.12	0.14	0.07	0.02	0.14	0.02	0.1	0.13	0.25	0.15	0.27	0.12	0.04	0.02	0.06	0.3	0.22	-0.02	0.08	0.14	0.21	0.14	0.11	0.01	-0.02	0.13	-0.12	0.28	0.07	0.18	0.24	0.13	-0.04	0.11	0.12	-0.04	0.32	-0.09	0.26	0.04	0.15	0.18	0.07	0.08	0.01
ABL2	0.23	0.22	0.24	0.16	0.13	0.19	0.14	0.13	0.07	-0.05	0.06	0.28	0.41	0.2	0.23	0.1	-0.03	0.13	0.25	0.21	0.1	-0.03	0.14	0.52	0.47	0.49	0	0.09	-0.09	0.09	-0.12	0.51	0.4	0.59	0.48	0.26	0.14	0.08	0.23	0	0.3	0.15	0.27	0.07	0.27	0.5	0.57	0.24	0.07
FSTL3	0.22	0.1	0.14	0.16	0.21	0.19	0.15	0.06	0.05	0.01	0.1	0.31	0.25	0.16	0.22	0.07	0.07	0.18	0.2	0.15	0.08	0.09	0.13	0.25	0.2	0.36	0.13	0.12	-0.05	-0.06	0.06	0.23	0.18	0.24	0.11	0.12	0.22	0.07	0.26	-0.04	0.1	0.14	0.14	0.03	0.35	0.19	0.4	0.19	0.04
CLDN1	0.22	0.28	0.25	0.39	0.11	0.25	0.22	0.36	0.35	0.29	0.28	0.21	0.17	0.28	0.31	0.21	0.23	0.17	0.28	0.19	0.14	0.16	0.27	0.16	0.2	0.09	0.1	0.2	0.14	0.07	0.15	0.13	0.21	0.22	0.24	0.18	0	0.17	0.08	0.09	0.2	0.3	0.16	0.28	0.11	0.13	0.12	-0.07	0.14
TEAD4	0.21	0.1	0.06	0.13	0.09	0.02	0.17	0.09	-0.01	-0.05	-0.01	0.13	0.31	-0.08	0.26	-0.04	-0.17	-0.01	0.19	0	-0.04	-0.11	-0.01	0.28	0.1	0.37	-0.13	0.01	-0.01	0.12	-0.16	0.16	0.25	0.28	0.15	0.24	0.17	0.04	0.25	-0.15	-0.06	0.02	0.02	-0.06	0.2	0.45	0.34	0.21	-0.01
WWC1	0.2	0.2	0.17	0.29	0.14	0.29	0.15	0.23	0.15	0.21	0.21	0.2	0.31	0.14	0.42	0.04	0.13	0.04	0.18	0.24	0.11	0.09	0.14	0.16	0.1	0.16	0.25	0.15	0.12	0.23	0.11	0.14	0.3	0.11	0.07	0.27	0.02	-0.05	0.18	0.18	0.18	0.19	0.16	0.22	0.2	0.17	0.16	0.21	0.38
NAV3	0.19	0.3	0.28	0.27	0.11	0.28	0.24	0.25	0.19	0.09	0.17	0.19	0.25	0.36	0.24	0.17	0.11	0	0.33	0.3	0.05	0.1	0.15	0.5	0.38	0.28	0.17	0.14	0.13	0.04	0.07	0.49	0.26	0.39	0.33	0.13	-0.06	0.07	0.2	0.24	0.23	0.25	0.13	0.19	0.21	0.32	0.35	0.16	0.09
ACAT2	0.18	0.27	0.16	0.15	0.07	0.15	0.09	0.19	0.21	0.07	0.2	0.16	0.26	0.24	0.11	0.23	0.14	0.08	0.2	0.24	0.07	0.14	0.16	0.35	0.24	0.27	0.19	0.19	-0.03	0.07	0.06	0.26	0.26	0.34	0.33	0.12	0.3	0	0.01	0.24	0.2	0.2	0.24	0.2	0.21	0.5	0.11	0.11	0.14
YAP1	0.18	0.31	0.3	0.24	0.04	0.38	0.23	0.05	0.28	0.13	0.1	0.24	0.31	0.35	0.44	0.22	0.09	0.01	0.43	0.41	0.16	-0.07	0.22	0.42	0.6	0.42	0.3	-0.06	0.16	0.14	-0.16	0.73	0.38	0.61	0.55	0.07	-0.16	0.06	0.23	0.17	0.51	0.17	0.4	0.11	0.24	0.27	0.23	0.11	0.11
CPA4	0.16	0.22	0.26	0.11	0.22	0.26	0.2	0.15	0.29	0.2	0.2	0.3	0.04	0.25	0.12	0.29	0.23	0.17	0.35	0.18	0.15	0.19	0.21	0.21	0.35	0.22	0.22	0.16	0.19	0.03	0.17	0.26	0	0.23	0.22	0.21	0.15	0.02	0.25	0.33	0.17	0.32	0.08	0.21	0.3	0.32	0.41	0.2	-0.01
FOSL1	0.16	0.19	0.14	0.1	0.26	0.17	0.02	0.06	0.17	-0.05	0.07	0.39	0.22	0.15	0.14	0.28	0.03	0.08	0.29	0.13	0.16	0.03	0.09	0.29	0.3	0.54	0.06	0.07	-0.08	-0.14	-0.01	0.19	0.06	0.2	0.28	0.3	0.28	0.06	0.16	-0.01	0.06	0.18	0.2	0.18	0.52	0.48	0.55	0.03	-0.13
LETM2	0.15	0.17	0.24	0.13	0.1	0.31	0.21	0.13	0.29	0.14	0.17	0.29	0.28	0.23	0.27	0.29	0.14	0.22	0.4	0.28	0.18	0.12	0.26	0.39	0.47	0.48	0.13	0.05	0.13	0.01	0.04	0.39	0.25	0.41	0.35	0.16	0.09	0.05	0.26	0.05	0.43	0.2	0.19	0.2	0.34	0.41	0.4	0.13	0.11
EPB41L4B	0.14	0.24	0.22	0.27	0.07	0.31	0.16	0.18	0.25	0.22	0.25	0.16	0.32	0.27	0.4	0.09	0.11	0.09	0.15	0.25	-0.01	0.05	0.27	0.2	0.14	0.17	0.27	0.16	0.19	0.25	0.07	0.26	0.23	0.28	0.21	0.08	-0.13	0.08	0.33	0.36	0.22	0.28	0.11	0.21	0.14	0.2	0.13	0.17	0.43
EPG5	0.13	0.08	0.13	0.02	-0.1	0.05	0.2	0.07	0.06	0	-0.01	0.01	0.14	0.11	-0.03	0.16	0.01	0.05	0.11	0.09	0.07	-0.02	-0.08	0.41	0.34	0.19	-0.01	0.07	-0.02	0.08	-0.09	0.45	0.45	0.45	0.29	0.16	0.26	-0.15	-0.06	0.23	0.12	0.29	0.24	-0.14	0.01	0.42	0.34	0.42	0.07
TK1	0.12	0.08	0.1	0.1	0.09	0.02	0.09	0.14	0.11	0	0.08	0.05	0.11	-0.08	0.16	0.02	-0.09	-0.02	0.2	-0.03	0.06	-0.01	0.06	0.16	0.1	0.24	-0.14	0.05	0.1	-0.08	-0.02	0.01	0.16	0.14	0.14	0.15	0.13	0.05	-0.07	0.05	0	0.1	0.03	0.1	0.11	0.59	0.24	0.14	0.04
PCLO	0.05	0.04	-0.06	-0.08	0.09	-0.01	0.06	-0.04	-0.04	0.13	0.04	0.13	0.04	0.08	-0.08	-0.01	0.04	0.1	-0.05	-0.16	-0.01	0.03	0	0.15	-0.01	-0.03	-0.06	-0.05	-0.09	-0.05	0.06	-0.06	-0.09	0.05	-0.07	-0.02	0.03	-0.03	-0.02	0.09	-0.04	-0.03	0.16	0.12	0.01	0.09	0.14	0.17	0.12
CYTH3	-0.01	-0.01	0.01	-0.13	-0.22	-0.08	0.02	-0.14	-0.01	-0.2	-0.2	-0.05	0	-0.16	-0.01	-0.07	-0.32	-0.12	0.28	0.01	-0.18	-0.3	-0.18	0.31	0.18	0.28	-0.11	-0.32	0	-0.27	-0.4	0.34	0.16	0.38	0.27	0.07	-0.04	-0.08	-0.02	-0.15	0.2	0.02	0.11	-0.16	0.05	0.23	0.27	0.06	-0.16
SH2D5	-0.03	-0.13	-0.16	-0.13	-0.11	-0.24	-0.1	-0.2	-0.11	-0.21	-0.23	-0.12	0.09	-0.03	-0.03	-0.21	-0.31	-0.1	-0.18	-0.17	-0.01	-0.3	-0.15	0.12	-0.07	0.11	-0.36	-0.23	-0.21	-0.14	-0.32	0	-0.07	-0.03	-0.12	0.02	-0.06	-0.05	-0.14	-0.11	-0.13	-0.11	0.1	-0.12	0.06	0.1	0.24	0.11	-0.05
PKD1L2	-0.08	-0.11	-0.14	-0.11	-0.13	-0.15	0.02	-0.24	-0.1	-0.12	-0.17	-0.18	-0.12	0	-0.16	-0.19	-0.14	-0.21	-0.27	-0.1	0.05	-0.14	-0.18	0.08	0	-0.19	-0.18	-0.24	-0.17	-0.09	-0.17	0.16	-0.04	0.01	0	0.01	-0.2	-0.12	-0.24	-0.1	0.05	-0.19	0.16	-0.15	-0.18	-0.06	-0.03	-0.05	-0.12
[truncated: 33 more columns]
